# Supplementary material for: Magnetically Induced Current Densities in π-Conjugated Porphyrin Nanoballs
Source: PubMed Central journal article supplement (PMC9639160; doi:10.1021/acs.jpca.2c04856), 2022-10-21
Supplement: jp2c04856_si_001.pdf [file jp2c04856_si_001.pdf]

# Magnetically Induced Current Densities in $\pi$ -Conjugated Porphyrin Nanoballs

Atif Mahmood,\* Maria Dimitrova,\* Lukas N. Wirz,\* and Dage Sundholm\*

*Department of Chemistry, University of Helsinki, P.O. Box 55, A. I. Virtasen aukio 1,  
FIN-00014 University of Helsinki, Finland*

E-mail: [atif.mahmood@helsinki.fi](mailto:atif.mahmood@helsinki.fi); [maria.dimitrova@helsinki.fi](mailto:maria.dimitrova@helsinki.fi); [lnwirz@chem.helsinki.fi](mailto:lnwirz@chem.helsinki.fi);  
[dage.sundholm@helsinki.fi](mailto:dage.sundholm@helsinki.fi)

## Complementary current-density pictures

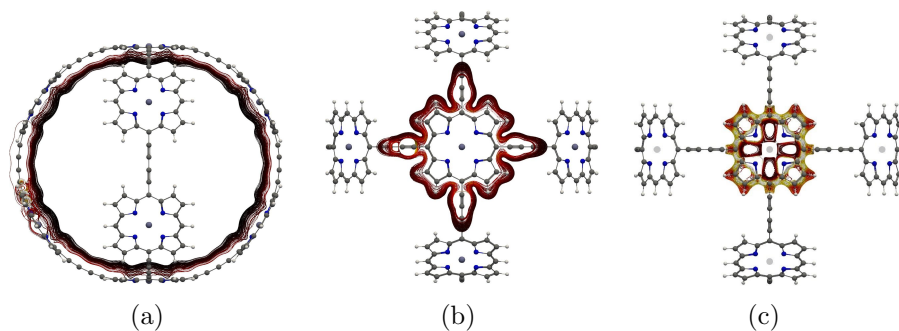

Figure S1: The MICD flux in molecule 1.

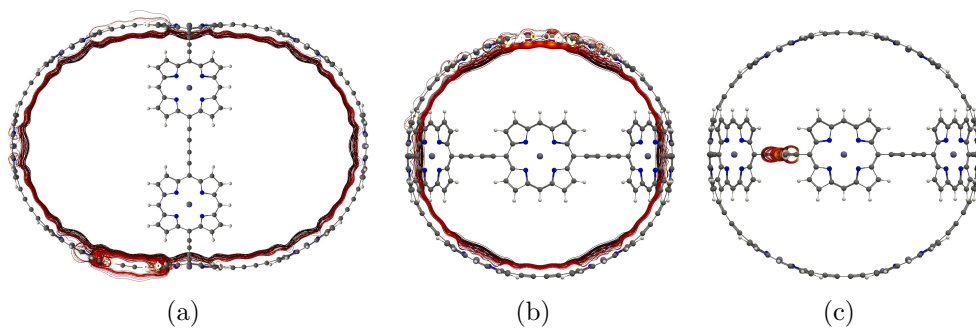

Figure S2: The MICD flux in different parts of molecule **2**.

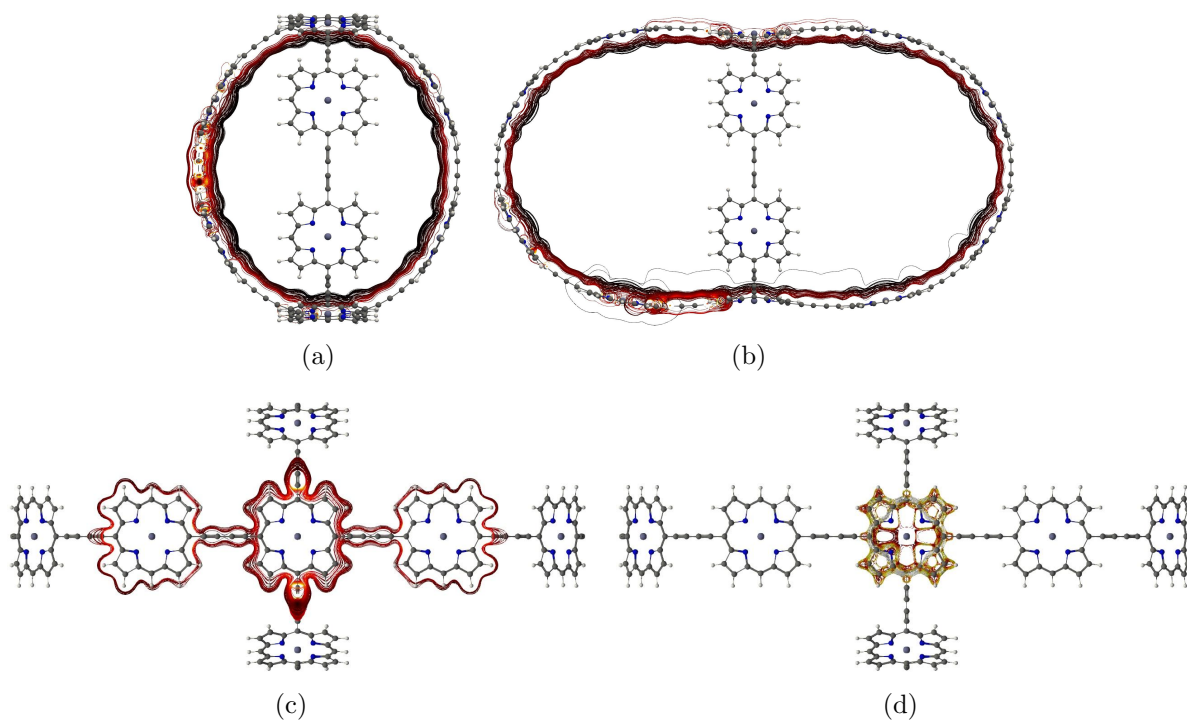

Figure S3: The MICD fluxes in molecule **3**.

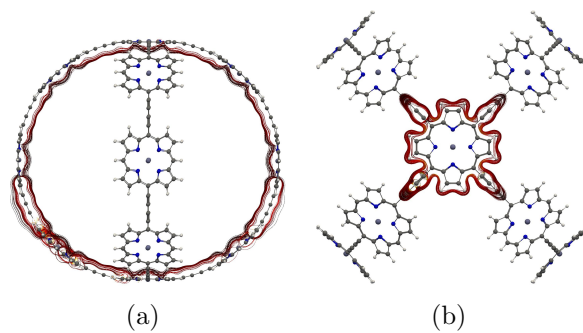

Figure S4: The MICD flux in molecule **4** and its dication.

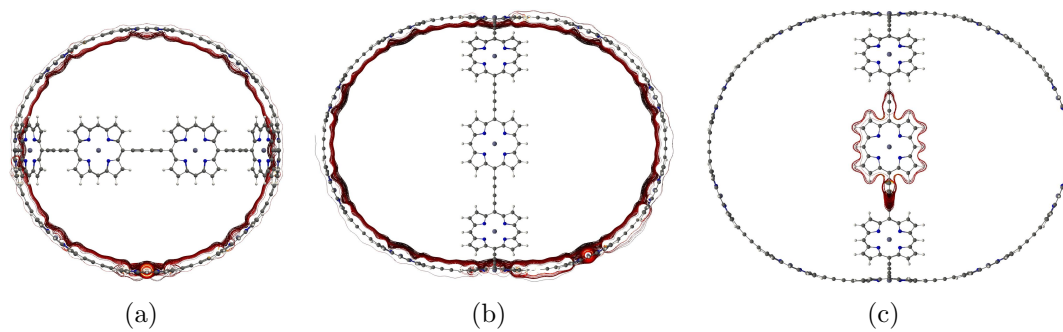

Figure S5: The current-density flux in molecule **5**.

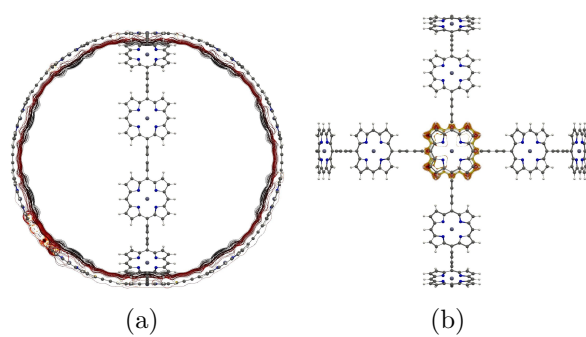

Figure S6: The current-density flux in molecule **6** and its dication.

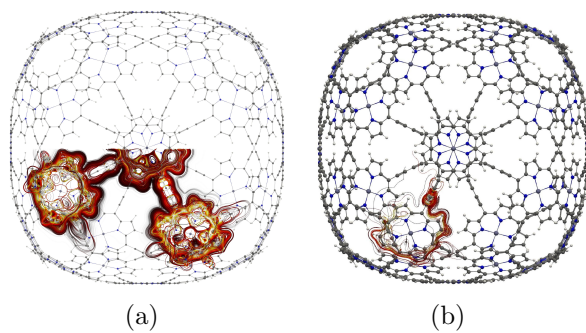

Figure S7: The current-density flux in molecule **7**.

## Molecular structures

Molecule 1

394

Energy =

|    |            |            |            |
|----|------------|------------|------------|
| Zn | -0.0000000 | -0.0000000 | 12.1781534 |
| C  | 3.5117847  | 2.5381433  | 12.0522946 |
| C  | 2.5381433  | 3.5117847  | 12.0522946 |
| C  | 1.2670370  | 2.8255102  | 12.1109466 |
| C  | 2.8255102  | 1.2670370  | 12.1109466 |
| N  | 1.4616903  | 1.4616903  | 12.1666240 |
| C  | 3.4790428  | 0.0000000  | 12.0464488 |
| C  | 2.8255102  | -1.2670370 | 12.1109466 |
| C  | 3.5117847  | -2.5381433 | 12.0522946 |
| C  | 2.5381433  | -3.5117847 | 12.0522946 |
| C  | 1.2670370  | -2.8255102 | 12.1109466 |
| N  | 1.4616903  | -1.4616903 | 12.1666240 |
| C  | 0.0000000  | -3.4790428 | 12.0464488 |
| C  | -1.2670370 | -2.8255102 | 12.1109466 |
| C  | -2.5381433 | -3.5117847 | 12.0522946 |
| C  | -3.5117847 | -2.5381433 | 12.0522946 |
| C  | -2.8255102 | -1.2670370 | 12.1109466 |
| N  | -1.4616903 | -1.4616903 | 12.1666240 |
| C  | -3.4790428 | -0.0000000 | 12.0464488 |
| C  | -2.8255102 | 1.2670370  | 12.1109466 |
| C  | -3.5117847 | 2.5381433  | 12.0522946 |
| C  | -2.5381433 | 3.5117847  | 12.0522946 |
| C  | -1.2670370 | 2.8255102  | 12.1109466 |
| N  | -1.4616903 | 1.4616903  | 12.1666240 |
| C  | -0.0000000 | 3.4790428  | 12.0464488 |
| H  | 4.5989437  | 2.6626450  | 12.0104600 |
| H  | 2.6626450  | 4.5989437  | 12.0104600 |
| H  | 4.5989437  | -2.6626450 | 12.0104600 |
| H  | 2.6626450  | -4.5989437 | 12.0104600 |
| H  | -2.6626450 | -4.5989437 | 12.0104600 |
| H  | -4.5989437 | -2.6626450 | 12.0104600 |
| H  | -4.5989437 | 2.6626450  | 12.0104600 |
| H  | -2.6626450 | 4.5989437  | 12.0104600 |
| Zn | 11.4751516 | 0.0000000  | 6.3909049  |
| C  | 12.8281081 | -3.5051320 | 4.2594678  |
| C  | 13.1827174 | -2.5460067 | 3.3366568  |
| C  | 12.8203258 | -1.2650847 | 3.9102388  |
| C  | 12.2232338 | -2.8072251 | 5.3764502  |
| N  | 12.2478847 | -1.4433692 | 5.1444375  |
| C  | 11.6260589 | -3.4262523 | 6.4849702  |
| C  | 10.8934788 | -2.8074854 | 7.5087028  |
| C  | 10.1563581 | -3.5053044 | 8.5434510  |
| C  | 9.4838624  | -2.5462300 | 9.2678774  |
| C  | 9.8398373  | -1.2651459 | 8.6900739  |
| N  | 10.6960754 | -1.4434164 | 7.6330514  |
| C  | 9.3632529  | 0.0000000  | 9.1565820  |
| C  | 9.8398373  | 1.2651459  | 8.6900739  |
| C  | 9.4838624  | 2.5462300  | 9.2678774  |
| C  | 10.1563581 | 3.5053044  | 8.5434510  |

|    |             |            |            |
|----|-------------|------------|------------|
| C  | 10.8934788  | 2.8074854  | 7.5087028  |
| N  | 10.6960754  | 1.4434164  | 7.6330514  |
| C  | 11.6260589  | 3.4262523  | 6.4849702  |
| C  | 12.2232338  | 2.8072251  | 5.3764502  |
| C  | 12.8281081  | 3.5051320  | 4.2594678  |
| C  | 13.1827174  | 2.5460067  | 3.3366568  |
| C  | 12.8203258  | 1.2650847  | 3.9102388  |
| N  | 12.2478847  | 1.4433692  | 5.1444375  |
| C  | 13.0291085  | -0.0000000 | 3.2765618  |
| H  | 12.9491416  | -4.5924257 | 4.1852579  |
| H  | 13.6559113  | -2.6824849 | 2.3582000  |
| H  | 10.1427640  | -4.5925954 | 8.6847476  |
| H  | 8.8134109   | -2.6827312 | 10.1233146 |
| H  | 8.8134109   | 2.6827312  | 10.1233146 |
| H  | 10.1427640  | 4.5925954  | 8.6847476  |
| H  | 12.9491416  | 4.5924257  | 4.1852579  |
| H  | 13.6559113  | 2.6824849  | 2.3582000  |
| Zn | -11.4751516 | 0.0000000  | 6.3909049  |
| C  | -12.8281081 | 3.5051320  | 4.2594678  |
| C  | -13.1827174 | 2.5460067  | 3.3366568  |
| C  | -12.8203258 | 1.2650847  | 3.9102388  |
| C  | -12.2232338 | 2.8072251  | 5.3764502  |
| N  | -12.2478847 | 1.4433692  | 5.1444375  |
| C  | -11.6260589 | 3.4262523  | 6.4849702  |
| C  | -10.8934788 | 2.8074854  | 7.5087028  |
| C  | -10.1563581 | 3.5053044  | 8.5434510  |
| C  | -9.4838624  | 2.5462300  | 9.2678774  |
| C  | -9.8398373  | 1.2651459  | 8.6900739  |
| N  | -10.6960754 | 1.4434164  | 7.6330514  |
| C  | -9.3632529  | -0.0000000 | 9.1565820  |
| C  | -9.8398373  | -1.2651459 | 8.6900739  |
| C  | -9.4838624  | -2.5462300 | 9.2678774  |
| C  | -10.1563581 | -3.5053044 | 8.5434510  |
| C  | -10.8934788 | -2.8074854 | 7.5087028  |
| N  | -10.6960754 | -1.4434164 | 7.6330514  |
| C  | -11.6260589 | -3.4262523 | 6.4849702  |
| C  | -12.2232338 | -2.8072251 | 5.3764502  |
| C  | -12.8281081 | -3.5051320 | 4.2594678  |
| C  | -13.1827174 | -2.5460067 | 3.3366568  |
| C  | -12.8203258 | -1.2650847 | 3.9102388  |
| N  | -12.2478847 | -1.4433692 | 5.1444375  |
| C  | -13.0291085 | 0.0000000  | 3.2765618  |
| H  | -12.9491416 | 4.5924257  | 4.1852579  |
| H  | -13.6559113 | 2.6824849  | 2.3582000  |
| H  | -10.1427640 | 4.5925954  | 8.6847476  |
| H  | -8.8134109  | 2.6827312  | 10.1233146 |
| H  | -8.8134109  | -2.6827312 | 10.1233146 |
| H  | -10.1427640 | -4.5925954 | 8.6847476  |
| H  | -12.9491416 | -4.5924257 | 4.1852579  |

|    |             |            |             |
|----|-------------|------------|-------------|
| H  | -13.6559113 | -2.6824849 | 2.3582000   |
| Zn | 11.4751516  | 0.0000000  | -6.3909049  |
| C  | 13.1827174  | -2.5460067 | -3.3366568  |
| C  | 12.8281081  | -3.5051320 | -4.2594678  |
| C  | 12.2232338  | -2.8072251 | -5.3764502  |
| C  | 12.8203258  | -1.2650847 | -3.9102388  |
| N  | 12.2478847  | -1.4433692 | -5.1444375  |
| C  | 13.0291085  | -0.0000000 | -3.2765618  |
| C  | 12.8203258  | 1.2650847  | -3.9102388  |
| C  | 13.1827174  | 2.5460067  | -3.3366568  |
| C  | 12.8281081  | 3.5051320  | -4.2594678  |
| C  | 12.2232338  | 2.8072251  | -5.3764502  |
| N  | 12.2478847  | 1.4433692  | -5.1444375  |
| C  | 11.6260589  | 3.4262523  | -6.4849702  |
| C  | 10.8934788  | 2.8074854  | -7.5087028  |
| C  | 10.1563581  | 3.5053044  | -8.5434510  |
| C  | 9.4838624   | 2.5462300  | -9.2678774  |
| C  | 9.8398373   | 1.2651459  | -8.6900739  |
| N  | 10.6960754  | 1.4434164  | -7.6330514  |
| C  | 9.3632529   | 0.0000000  | -9.1565820  |
| C  | 9.8398373   | -1.2651459 | -8.6900739  |
| C  | 9.4838624   | -2.5462300 | -9.2678774  |
| C  | 10.1563581  | -3.5053044 | -8.5434510  |
| C  | 10.8934788  | -2.8074854 | -7.5087028  |
| N  | 10.6960754  | -1.4434164 | -7.6330514  |
| C  | 11.6260589  | -3.4262523 | -6.4849702  |
| H  | 13.6559113  | -2.6824849 | -2.3582000  |
| H  | 12.9491416  | -4.5924257 | -4.1852579  |
| H  | 13.6559113  | 2.6824849  | -2.3582000  |
| H  | 12.9491416  | 4.5924257  | -4.1852579  |
| H  | 10.1427640  | 4.5925954  | -8.6847476  |
| H  | 8.8134109   | 2.6827312  | -10.1233146 |
| H  | 8.8134109   | -2.6827312 | -10.1233146 |
| H  | 10.1427640  | -4.5925954 | -8.6847476  |
| Zn | -11.4751516 | 0.0000000  | -6.3909049  |
| C  | -13.1827174 | 2.5460067  | -3.3366568  |
| C  | -12.8281081 | 3.5051320  | -4.2594678  |
| C  | -12.2232338 | 2.8072251  | -5.3764502  |
| C  | -12.8203258 | 1.2650847  | -3.9102388  |
| N  | -12.2478847 | 1.4433692  | -5.1444375  |
| C  | -13.0291085 | 0.0000000  | -3.2765618  |
| C  | -12.8203258 | -1.2650847 | -3.9102388  |
| C  | -13.1827174 | -2.5460067 | -3.3366568  |
| C  | -12.8281081 | -3.5051320 | -4.2594678  |
| C  | -12.2232338 | -2.8072251 | -5.3764502  |
| N  | -12.2478847 | -1.4433692 | -5.1444375  |
| C  | -11.6260589 | -3.4262523 | -6.4849702  |
| C  | -10.8934788 | -2.8074854 | -7.5087028  |
| C  | -10.1563581 | -3.5053044 | -8.5434510  |

|    |             |            |             |
|----|-------------|------------|-------------|
| C  | -9.4838624  | -2.5462300 | -9.2678774  |
| C  | -9.8398373  | -1.2651459 | -8.6900739  |
| N  | -10.6960754 | -1.4434164 | -7.6330514  |
| C  | -9.3632529  | -0.0000000 | -9.1565820  |
| C  | -9.8398373  | 1.2651459  | -8.6900739  |
| C  | -9.4838624  | 2.5462300  | -9.2678774  |
| C  | -10.1563581 | 3.5053044  | -8.5434510  |
| C  | -10.8934788 | 2.8074854  | -7.5087028  |
| N  | -10.6960754 | 1.4434164  | -7.6330514  |
| C  | -11.6260589 | 3.4262523  | -6.4849702  |
| H  | -13.6559113 | 2.6824849  | -2.3582000  |
| H  | -12.9491416 | 4.5924257  | -4.1852579  |
| H  | -13.6559113 | -2.6824849 | -2.3582000  |
| H  | -12.9491416 | -4.5924257 | -4.1852579  |
| H  | -10.1427640 | -4.5925954 | -8.6847476  |
| H  | -8.8134109  | -2.6827312 | -10.1233146 |
| H  | -8.8134109  | 2.6827312  | -10.1233146 |
| H  | -10.1427640 | 4.5925954  | -8.6847476  |
| Zn | -0.0000000  | 0.0000000  | -12.1781534 |
| C  | 3.5117847   | -2.5381433 | -12.0522946 |
| C  | 2.5381433   | -3.5117847 | -12.0522946 |
| C  | 1.2670370   | -2.8255102 | -12.1109466 |
| C  | 2.8255102   | -1.2670370 | -12.1109466 |
| N  | 1.4616903   | -1.4616903 | -12.1666240 |
| C  | 3.4790428   | 0.0000000  | -12.0464488 |
| C  | 2.8255102   | 1.2670370  | -12.1109466 |
| C  | 3.5117847   | 2.5381433  | -12.0522946 |
| C  | 2.5381433   | 3.5117847  | -12.0522946 |
| C  | 1.2670370   | 2.8255102  | -12.1109466 |
| N  | 1.4616903   | 1.4616903  | -12.1666240 |
| C  | -0.0000000  | 3.4790428  | -12.0464488 |
| C  | -1.2670370  | 2.8255102  | -12.1109466 |
| C  | -2.5381433  | 3.5117847  | -12.0522946 |
| C  | -3.5117847  | 2.5381433  | -12.0522946 |
| C  | -2.8255102  | 1.2670370  | -12.1109466 |
| N  | -1.4616903  | 1.4616903  | -12.1666240 |
| C  | -3.4790428  | -0.0000000 | -12.0464488 |
| C  | -2.8255102  | -1.2670370 | -12.1109466 |
| C  | -3.5117847  | -2.5381433 | -12.0522946 |
| C  | -2.5381433  | -3.5117847 | -12.0522946 |
| C  | -1.2670370  | -2.8255102 | -12.1109466 |
| N  | -1.4616903  | -1.4616903 | -12.1666240 |
| C  | 0.0000000   | -3.4790428 | -12.0464488 |
| H  | 4.5989437   | -2.6626450 | -12.0104600 |
| H  | 2.6626450   | -4.5989437 | -12.0104600 |
| H  | 4.5989437   | 2.6626450  | -12.0104600 |
| H  | 2.6626450   | 4.5989437  | -12.0104600 |
| H  | -2.6626450  | 4.5989437  | -12.0104600 |
| H  | -4.5989437  | 2.6626450  | -12.0104600 |

|    |            |             |             |
|----|------------|-------------|-------------|
| H  | -4.5989437 | -2.6626450  | -12.0104600 |
| H  | -2.6626450 | -4.5989437  | -12.0104600 |
| Zn | 0.0000000  | 11.4751516  | 6.3909049   |
| C  | 3.5051320  | 12.8281081  | 4.2594678   |
| C  | 2.5460067  | 13.1827174  | 3.3366568   |
| C  | 1.2650847  | 12.8203258  | 3.9102388   |
| C  | 2.8072251  | 12.2232338  | 5.3764502   |
| N  | 1.4433692  | 12.2478847  | 5.1444375   |
| C  | 3.4262523  | 11.6260589  | 6.4849702   |
| C  | 2.8074854  | 10.8934788  | 7.5087028   |
| C  | 3.5053044  | 10.1563581  | 8.5434510   |
| C  | 2.5462300  | 9.4838624   | 9.2678774   |
| C  | 1.2651459  | 9.8398373   | 8.6900739   |
| N  | 1.4434164  | 10.6960754  | 7.6330514   |
| C  | -0.0000000 | 9.3632529   | 9.1565820   |
| C  | -1.2651459 | 9.8398373   | 8.6900739   |
| C  | -2.5462300 | 9.4838624   | 9.2678774   |
| C  | -3.5053044 | 10.1563581  | 8.5434510   |
| C  | -2.8074854 | 10.8934788  | 7.5087028   |
| N  | -1.4434164 | 10.6960754  | 7.6330514   |
| C  | -3.4262523 | 11.6260589  | 6.4849702   |
| C  | -2.8072251 | 12.2232338  | 5.3764502   |
| C  | -3.5051320 | 12.8281081  | 4.2594678   |
| C  | -2.5460067 | 13.1827174  | 3.3366568   |
| C  | -1.2650847 | 12.8203258  | 3.9102388   |
| N  | -1.4433692 | 12.2478847  | 5.1444375   |
| C  | 0.0000000  | 13.0291085  | 3.2765618   |
| H  | 4.5924257  | 12.9491416  | 4.1852579   |
| H  | 2.6824849  | 13.6559113  | 2.3582000   |
| H  | 4.5925954  | 10.1427640  | 8.6847476   |
| H  | 2.6827312  | 8.8134109   | 10.1233146  |
| H  | -2.6827312 | 8.8134109   | 10.1233146  |
| H  | -4.5925954 | 10.1427640  | 8.6847476   |
| H  | -4.5924257 | 12.9491416  | 4.1852579   |
| H  | -2.6824849 | 13.6559113  | 2.3582000   |
| Zn | 0.0000000  | -11.4751516 | 6.3909049   |
| C  | 2.5460067  | -13.1827174 | 3.3366568   |
| C  | 3.5051320  | -12.8281081 | 4.2594678   |
| C  | 2.8072251  | -12.2232338 | 5.3764502   |
| C  | 1.2650847  | -12.8203258 | 3.9102388   |
| N  | 1.4433692  | -12.2478847 | 5.1444375   |
| C  | -0.0000000 | -13.0291085 | 3.2765618   |
| C  | -1.2650847 | -12.8203258 | 3.9102388   |
| C  | -2.5460067 | -13.1827174 | 3.3366568   |
| C  | -3.5051320 | -12.8281081 | 4.2594678   |
| C  | -2.8072251 | -12.2232338 | 5.3764502   |
| N  | -1.4433692 | -12.2478847 | 5.1444375   |
| C  | -3.4262523 | -11.6260589 | 6.4849702   |
| C  | -2.8074854 | -10.8934788 | 7.5087028   |



|    |            |             |            |
|----|------------|-------------|------------|
| C  | -3.5053044 | -10.1563581 | 8.5434510  |
| C  | -2.5462300 | -9.4838624  | 9.2678774  |
| C  | -1.2651459 | -9.8398373  | 8.6900739  |
| N  | -1.4434164 | -10.6960754 | 7.6330514  |
| C  | 0.0000000  | -9.3632529  | 9.1565820  |
| C  | 1.2651459  | -9.8398373  | 8.6900739  |
| C  | 2.5462300  | -9.4838624  | 9.2678774  |
| C  | 3.5053044  | -10.1563581 | 8.5434510  |
| C  | 2.8074854  | -10.8934788 | 7.5087028  |
| N  | 1.4434164  | -10.6960754 | 7.6330514  |
| C  | 3.4262523  | -11.6260589 | 6.4849702  |
| H  | 2.6824849  | -13.6559113 | 2.3582000  |
| H  | 4.5924257  | -12.9491416 | 4.1852579  |
| H  | -2.6824849 | -13.6559113 | 2.3582000  |
| H  | -4.5924257 | -12.9491416 | 4.1852579  |
| H  | -4.5925954 | -10.1427640 | 8.6847476  |
| H  | -2.6827312 | -8.8134109  | 10.1233146 |
| H  | 2.6827312  | -8.8134109  | 10.1233146 |
| H  | 4.5925954  | -10.1427640 | 8.6847476  |
| Zn | 0.0000000  | 11.4751516  | -6.3909049 |
| C  | 2.5460067  | 13.1827174  | -3.3366568 |
| C  | 3.5051320  | 12.8281081  | -4.2594678 |
| C  | 2.8072251  | 12.2232338  | -5.3764502 |
| C  | 1.2650847  | 12.8203258  | -3.9102388 |
| N  | 1.4433692  | 12.2478847  | -5.1444375 |
| C  | 0.0000000  | 13.0291085  | -3.2765618 |
| C  | -1.2650847 | 12.8203258  | -3.9102388 |
| C  | -2.5460067 | 13.1827174  | -3.3366568 |
| C  | -3.5051320 | 12.8281081  | -4.2594678 |
| C  | -2.8072251 | 12.2232338  | -5.3764502 |
| N  | -1.4433692 | 12.2478847  | -5.1444375 |
| C  | -3.4262523 | 11.6260589  | -6.4849702 |
| C  | -2.8074854 | 10.8934788  | -7.5087028 |
| C  | -3.5053044 | 10.1563581  | -8.5434510 |
| C  | -2.5462300 | 9.4838624   | -9.2678774 |
| C  | -1.2651459 | 9.8398373   | -8.6900739 |
| N  | -1.4434164 | 10.6960754  | -7.6330514 |
| C  | -0.0000000 | 9.3632529   | -9.1565820 |
| C  | 1.2651459  | 9.8398373   | -8.6900739 |
| C  | 2.5462300  | 9.4838624   | -9.2678774 |
| C  | 3.5053044  | 10.1563581  | -8.5434510 |
| C  | 2.8074854  | 10.8934788  | -7.5087028 |
| N  | 1.4434164  | 10.6960754  | -7.6330514 |
| C  | 3.4262523  | 11.6260589  | -6.4849702 |
| H  | 2.6824849  | 13.6559113  | -2.3582000 |
| H  | 4.5924257  | 12.9491416  | -4.1852579 |
| H  | -2.6824849 | 13.6559113  | -2.3582000 |
| H  | -4.5924257 | 12.9491416  | -4.1852579 |
| H  | -4.5925954 | 10.1427640  | -8.6847476 |

|    |            |             |             |
|----|------------|-------------|-------------|
| H  | -2.6827312 | 8.8134109   | -10.1233146 |
| H  | 2.6827312  | 8.8134109   | -10.1233146 |
| H  | 4.5925954  | 10.1427640  | -8.6847476  |
| Zn | 0.0000000  | -11.4751516 | -6.3909049  |
| C  | 3.5051320  | -12.8281081 | -4.2594678  |
| C  | 2.5460067  | -13.1827174 | -3.3366568  |
| C  | 1.2650847  | -12.8203258 | -3.9102388  |
| C  | 2.8072251  | -12.2232338 | -5.3764502  |
| N  | 1.4433692  | -12.2478847 | -5.1444375  |
| C  | 3.4262523  | -11.6260589 | -6.4849702  |
| C  | 2.8074854  | -10.8934788 | -7.5087028  |
| C  | 3.5053044  | -10.1563581 | -8.5434510  |
| C  | 2.5462300  | -9.4838624  | -9.2678774  |
| C  | 1.2651459  | -9.8398373  | -8.6900739  |
| N  | 1.4434164  | -10.6960754 | -7.6330514  |
| C  | 0.0000000  | -9.3632529  | -9.1565820  |
| C  | -1.2651459 | -9.8398373  | -8.6900739  |
| C  | -2.5462300 | -9.4838624  | -9.2678774  |
| C  | -3.5053044 | -10.1563581 | -8.5434510  |
| C  | -2.8074854 | -10.8934788 | -7.5087028  |
| N  | -1.4434164 | -10.6960754 | -7.6330514  |
| C  | -3.4262523 | -11.6260589 | -6.4849702  |
| C  | -2.8072251 | -12.2232338 | -5.3764502  |
| C  | -3.5051320 | -12.8281081 | -4.2594678  |
| C  | -2.5460067 | -13.1827174 | -3.3366568  |
| C  | -1.2650847 | -12.8203258 | -3.9102388  |
| N  | -1.4433692 | -12.2478847 | -5.1444375  |
| C  | -0.0000000 | -13.0291085 | -3.2765618  |
| H  | 4.5924257  | -12.9491416 | -4.1852579  |
| H  | 2.6824849  | -13.6559113 | -2.3582000  |
| H  | 4.5925954  | -10.1427640 | -8.6847476  |
| H  | 2.6827312  | -8.8134109  | -10.1233146 |
| H  | -2.6827312 | -8.8134109  | -10.1233146 |
| H  | -4.5925954 | -10.1427640 | -8.6847476  |
| H  | -4.5924257 | -12.9491416 | -4.1852579  |
| H  | -2.6824849 | -13.6559113 | -2.3582000  |
| C  | 4.8635709  | -0.0000000  | 11.7653690  |
| C  | 6.0354994  | 0.0000000   | 11.3468132  |
| C  | 7.2500697  | -0.0000000  | 10.7538784  |
| C  | 8.2966402  | 0.0000000   | 10.0797155  |
| C  | -0.0000000 | -4.8635709  | 11.7653690  |
| C  | 0.0000000  | -6.0354994  | 11.3468132  |
| C  | 0.0000000  | -7.2500697  | 10.7538784  |
| C  | 0.0000000  | -8.2966402  | 10.0797155  |
| C  | -4.8635709 | 0.0000000   | 11.7653690  |
| C  | -6.0354994 | -0.0000000  | 11.3468132  |
| C  | -7.2500697 | -0.0000000  | 10.7538784  |
| C  | -8.2966402 | 0.0000000   | 10.0797155  |
| C  | 0.0000000  | 4.8635709   | 11.7653690  |

|   |             |             |             |
|---|-------------|-------------|-------------|
| C | 0.0000000   | 6.0354994   | 11.3468132  |
| C | 0.0000000   | 7.2500697   | 10.7538784  |
| C | 0.0000000   | 8.2966402   | 10.0797155  |
| C | 13.3888791  | 0.0000000   | 1.9126601   |
| C | 13.5307179  | 0.0000000   | 0.6756645   |
| C | 13.5307179  | 0.0000000   | -0.6756645  |
| C | 13.3888791  | 0.0000000   | -1.9126601  |
| C | -13.3888791 | -0.0000000  | 1.9126601   |
| C | -13.5307179 | 0.0000000   | 0.6756645   |
| C | -13.5307179 | 0.0000000   | -0.6756645  |
| C | -13.3888791 | -0.0000000  | -1.9126601  |
| C | 8.2966402   | 0.0000000   | -10.0797155 |
| C | 7.2500697   | -0.0000000  | -10.7538784 |
| C | 6.0354994   | 0.0000000   | -11.3468132 |
| C | 4.8635709   | -0.0000000  | -11.7653690 |
| C | -8.2966402  | 0.0000000   | -10.0797155 |
| C | -7.2500697  | -0.0000000  | -10.7538784 |
| C | -6.0354994  | -0.0000000  | -11.3468132 |
| C | -4.8635709  | 0.0000000   | -11.7653690 |
| C | 0.0000000   | 4.8635709   | -11.7653690 |
| C | 0.0000000   | 6.0354994   | -11.3468132 |
| C | 0.0000000   | 7.2500697   | -10.7538784 |
| C | 0.0000000   | 8.2966402   | -10.0797155 |
| C | -0.0000000  | -4.8635709  | -11.7653690 |
| C | 0.0000000   | -6.0354994  | -11.3468132 |
| C | 0.0000000   | -7.2500697  | -10.7538784 |
| C | 0.0000000   | -8.2966402  | -10.0797155 |
| C | -0.0000000  | 13.3888791  | 1.9126601   |
| C | 0.0000000   | 13.5307179  | 0.6756645   |
| C | 0.0000000   | 13.5307179  | -0.6756645  |
| C | -0.0000000  | 13.3888791  | -1.9126601  |
| C | 0.0000000   | -13.3888791 | 1.9126601   |
| C | 0.0000000   | -13.5307179 | 0.6756645   |
| C | 0.0000000   | -13.5307179 | -0.6756645  |
| C | 0.0000000   | -13.3888791 | -1.9126601  |
| H | 11.6832716  | -4.5242554  | 6.5204992   |
| H | 11.6832716  | 4.5242554   | 6.5204992   |
| H | -11.6832716 | 4.5242554   | 6.5204992   |
| H | -11.6832716 | -4.5242554  | 6.5204992   |
| H | 11.6832716  | 4.5242554   | -6.5204992  |
| H | 11.6832716  | -4.5242554  | -6.5204992  |
| H | -11.6832716 | -4.5242554  | -6.5204992  |
| H | -11.6832716 | 4.5242554   | -6.5204992  |
| H | 4.5242554   | 11.6832716  | 6.5204992   |
| H | -4.5242554  | 11.6832716  | 6.5204992   |
| H | -4.5242554  | -11.6832716 | 6.5204992   |
| H | 4.5242554   | -11.6832716 | 6.5204992   |
| H | -4.5242554  | 11.6832716  | -6.5204992  |
| H | 4.5242554   | 11.6832716  | -6.5204992  |

|   |            |             |            |
|---|------------|-------------|------------|
| H | 4.5242554  | -11.6832716 | -6.5204992 |
| H | -4.5242554 | -11.6832716 | -6.5204992 |

## Molecule 2

472

Energy =

|    |             |            |            |
|----|-------------|------------|------------|
| Zn | 13.5147414  | 0.0000000  | 0.0000000  |
| C  | 13.3141713  | -3.4980759 | -2.5371976 |
| C  | 13.4904412  | -2.5367154 | -3.5081999 |
| C  | 13.5823315  | -1.2668885 | -2.8221516 |
| C  | 13.3281937  | -2.8091789 | -1.2665809 |
| N  | 13.5031546  | -1.4562105 | -1.4592027 |
| C  | 13.1638322  | -3.4477351 | 0.0000000  |
| C  | 13.3281937  | -2.8091789 | 1.2665809  |
| C  | 13.3141713  | -3.4980759 | 2.5371976  |
| C  | 13.4904412  | -2.5367154 | 3.5081999  |
| C  | 13.5823315  | -1.2668885 | 2.8221516  |
| N  | 13.5031546  | -1.4562105 | 1.4592027  |
| C  | 13.6450870  | 0.0000000  | 3.4785500  |
| C  | 13.5823315  | 1.2668885  | 2.8221516  |
| C  | 13.4904412  | 2.5367154  | 3.5081999  |
| C  | 13.3141713  | 3.4980759  | 2.5371976  |
| C  | 13.3281937  | 2.8091789  | 1.2665809  |
| N  | 13.5031546  | 1.4562105  | 1.4592027  |
| C  | 13.1638322  | 3.4477351  | 0.0000000  |
| C  | 13.3281937  | 2.8091789  | -1.2665809 |
| C  | 13.3141713  | 3.4980759  | -2.5371976 |
| C  | 13.4904412  | 2.5367154  | -3.5081999 |
| C  | 13.5823315  | 1.2668885  | -2.8221516 |
| N  | 13.5031546  | 1.4562105  | -1.4592027 |
| C  | 13.6450870  | 0.0000000  | -3.4785500 |
| H  | 13.1925222  | -4.5791305 | -2.6637403 |
| H  | 13.5363023  | -2.6679473 | -4.5943735 |
| H  | 13.1925222  | -4.5791305 | 2.6637403  |
| H  | 13.5363023  | -2.6679473 | 4.5943735  |
| H  | 13.5363023  | 2.6679473  | 4.5943735  |
| H  | 13.1925222  | 4.5791305  | 2.6637403  |
| H  | 13.1925222  | 4.5791305  | -2.6637403 |
| H  | 13.5363023  | 2.6679473  | -4.5943735 |
| Zn | -13.5147414 | 0.0000000  | 0.0000000  |
| C  | -13.3141713 | -3.4980759 | 2.5371976  |
| C  | -13.4904412 | -2.5367154 | 3.5081999  |
| C  | -13.5823315 | -1.2668885 | 2.8221516  |
| C  | -13.3281937 | -2.8091789 | 1.2665809  |
| N  | -13.5031546 | -1.4562105 | 1.4592027  |
| C  | -13.1638322 | -3.4477351 | 0.0000000  |
| C  | -13.3281937 | -2.8091789 | -1.2665809 |
| C  | -13.3141713 | -3.4980759 | -2.5371976 |

|    |             |            |            |
|----|-------------|------------|------------|
| C  | -13.4904412 | -2.5367154 | -3.5081999 |
| C  | -13.5823315 | -1.2668885 | -2.8221516 |
| N  | -13.5031546 | -1.4562105 | -1.4592027 |
| C  | -13.6450870 | 0.0000000  | -3.4785500 |
| C  | -13.5823315 | 1.2668885  | -2.8221516 |
| C  | -13.4904412 | 2.5367154  | -3.5081999 |
| C  | -13.3141713 | 3.4980759  | -2.5371976 |
| C  | -13.3281937 | 2.8091789  | -1.2665809 |
| N  | -13.5031546 | 1.4562105  | -1.4592027 |
| C  | -13.1638322 | 3.4477351  | 0.0000000  |
| C  | -13.3281937 | 2.8091789  | 1.2665809  |
| C  | -13.3141713 | 3.4980759  | 2.5371976  |
| C  | -13.4904412 | 2.5367154  | 3.5081999  |
| C  | -13.5823315 | 1.2668885  | 2.8221516  |
| N  | -13.5031546 | 1.4562105  | 1.4592027  |
| C  | -13.6450870 | 0.0000000  | 3.4785500  |
| H  | -13.1925222 | -4.5791305 | 2.6637403  |
| H  | -13.5363023 | -2.6679473 | 4.5943735  |
| H  | -13.1925222 | -4.5791305 | -2.6637403 |
| H  | -13.5363023 | -2.6679473 | -4.5943735 |
| H  | -13.5363023 | 2.6679473  | -4.5943735 |
| H  | -13.1925222 | 4.5791305  | -2.6637403 |
| H  | -13.1925222 | 4.5791305  | 2.6637403  |
| H  | -13.5363023 | 2.6679473  | 4.5943735  |
| Zn | 6.5388730   | 10.6915004 | 0.0000000  |
| C  | 9.6122637   | 9.0142615  | -2.5466631 |
| C  | 8.8123441   | 9.5930012  | -3.5066558 |
| C  | 7.7050356   | 10.2153230 | -2.8085539 |
| C  | 9.0027629   | 9.3113180  | -1.2651943 |
| N  | 7.8551213   | 10.0418310 | -1.4436756 |
| C  | 9.5252659   | 8.8971790  | 0.0000000  |
| C  | 9.0027629   | 9.3113180  | 1.2651943  |
| C  | 9.6122637   | 9.0142615  | 2.5466631  |
| C  | 8.8123441   | 9.5930012  | 3.5066558  |
| C  | 7.7050356   | 10.2153230 | 2.8085539  |
| N  | 7.8551213   | 10.0418310 | 1.4436756  |
| C  | 6.6086372   | 10.8329117 | 3.4276679  |
| C  | 5.4497944   | 11.3243003 | 2.8081519  |
| C  | 4.2825795   | 11.8246168 | 3.5064238  |
| C  | 3.3366364   | 12.1079728 | 2.5464225  |
| C  | 3.9424442   | 11.8040879 | 1.2650454  |
| N  | 5.2202821   | 11.3365375 | 1.4436478  |
| C  | 3.2965326   | 11.9702535 | 0.0000000  |
| C  | 3.9424442   | 11.8040879 | -1.2650454 |
| C  | 3.3366364   | 12.1079728 | -2.5464225 |
| C  | 4.2825795   | 11.8246168 | -3.5064238 |
| C  | 5.4497944   | 11.3243003 | -2.8081519 |
| N  | 5.2202821   | 11.3365375 | -1.4436478 |
| C  | 6.6086372   | 10.8329117 | -3.4276679 |

|    |            |             |            |
|----|------------|-------------|------------|
| H  | 10.5370765 | 8.4432534   | -2.6827832 |
| H  | 8.9493246  | 9.5871471   | -4.5945600 |
| H  | 10.5370765 | 8.4432534   | 2.6827832  |
| H  | 8.9493246  | 9.5871471   | 4.5945600  |
| H  | 4.1950450  | 11.9302924  | 4.5943157  |
| H  | 2.3212960  | 12.4957121  | 2.6825129  |
| H  | 2.3212960  | 12.4957121  | -2.6825129 |
| H  | 4.1950450  | 11.9302924  | -4.5943157 |
| Zn | 6.5388730  | -10.6915004 | 0.0000000  |
| C  | 8.8123441  | -9.5930012  | -3.5066558 |
| C  | 9.6122637  | -9.0142615  | -2.5466631 |
| C  | 9.0027629  | -9.3113180  | -1.2651943 |
| C  | 7.7050356  | -10.2153230 | -2.8085539 |
| N  | 7.8551213  | -10.0418310 | -1.4436756 |
| C  | 6.6086372  | -10.8329117 | -3.4276679 |
| C  | 5.4497944  | -11.3243003 | -2.8081519 |
| C  | 4.2825795  | -11.8246168 | -3.5064238 |
| C  | 3.3366364  | -12.1079728 | -2.5464225 |
| C  | 3.9424442  | -11.8040879 | -1.2650454 |
| N  | 5.2202821  | -11.3365375 | -1.4436478 |
| C  | 3.2965326  | -11.9702535 | 0.0000000  |
| C  | 3.9424442  | -11.8040879 | 1.2650454  |
| C  | 3.3366364  | -12.1079728 | 2.5464225  |
| C  | 4.2825795  | -11.8246168 | 3.5064238  |
| C  | 5.4497944  | -11.3243003 | 2.8081519  |
| N  | 5.2202821  | -11.3365375 | 1.4436478  |
| C  | 6.6086372  | -10.8329117 | 3.4276679  |
| C  | 7.7050356  | -10.2153230 | 2.8085539  |
| C  | 8.8123441  | -9.5930012  | 3.5066558  |
| C  | 9.6122637  | -9.0142615  | 2.5466631  |
| C  | 9.0027629  | -9.3113180  | 1.2651943  |
| N  | 7.8551213  | -10.0418310 | 1.4436756  |
| C  | 9.5252659  | -8.8971790  | 0.0000000  |
| H  | 8.9493246  | -9.5871471  | -4.5945600 |
| H  | 10.5370765 | -8.4432534  | -2.6827832 |
| H  | 4.1950450  | -11.9302924 | -4.5943157 |
| H  | 2.3212960  | -12.4957121 | -2.6825129 |
| H  | 2.3212960  | -12.4957121 | 2.6825129  |
| H  | 4.1950450  | -11.9302924 | 4.5943157  |
| H  | 8.9493246  | -9.5871471  | 4.5945600  |
| H  | 10.5370765 | -8.4432534  | 2.6827832  |
| Zn | -6.5388730 | 10.6915004  | 0.0000000  |
| C  | -4.2825795 | 11.8246168  | 3.5064238  |
| C  | -3.3366364 | 12.1079728  | 2.5464225  |
| C  | -3.9424442 | 11.8040879  | 1.2650454  |
| C  | -5.4497944 | 11.3243003  | 2.8081519  |
| N  | -5.2202821 | 11.3365375  | 1.4436478  |
| C  | -6.6086372 | 10.8329117  | 3.4276679  |
| C  | -7.7050356 | 10.2153230  | 2.8085539  |

|    |             |             |            |
|----|-------------|-------------|------------|
| C  | -8.8123441  | 9.5930012   | 3.5066558  |
| C  | -9.6122637  | 9.0142615   | 2.5466631  |
| C  | -9.0027629  | 9.3113180   | 1.2651943  |
| N  | -7.8551213  | 10.0418310  | 1.4436756  |
| C  | -9.5252659  | 8.8971790   | 0.0000000  |
| C  | -9.0027629  | 9.3113180   | -1.2651943 |
| C  | -9.6122637  | 9.0142615   | -2.5466631 |
| C  | -8.8123441  | 9.5930012   | -3.5066558 |
| C  | -7.7050356  | 10.2153230  | -2.8085539 |
| N  | -7.8551213  | 10.0418310  | -1.4436756 |
| C  | -6.6086372  | 10.8329117  | -3.4276679 |
| C  | -5.4497944  | 11.3243003  | -2.8081519 |
| C  | -4.2825795  | 11.8246168  | -3.5064238 |
| C  | -3.3366364  | 12.1079728  | -2.5464225 |
| C  | -3.9424442  | 11.8040879  | -1.2650454 |
| N  | -5.2202821  | 11.3365375  | -1.4436478 |
| C  | -3.2965326  | 11.9702535  | 0.0000000  |
| H  | -4.1950450  | 11.9302924  | 4.5943157  |
| H  | -2.3212960  | 12.4957121  | 2.6825129  |
| H  | -8.9493246  | 9.5871471   | 4.5945600  |
| H  | -10.5370765 | 8.4432534   | 2.6827832  |
| H  | -10.5370765 | 8.4432534   | -2.6827832 |
| H  | -8.9493246  | 9.5871471   | -4.5945600 |
| H  | -4.1950450  | 11.9302924  | -4.5943157 |
| H  | -2.3212960  | 12.4957121  | -2.6825129 |
| Zn | -6.5388730  | -10.6915004 | 0.0000000  |
| C  | -3.3366364  | -12.1079728 | 2.5464225  |
| C  | -4.2825795  | -11.8246168 | 3.5064238  |
| C  | -5.4497944  | -11.3243003 | 2.8081519  |
| C  | -3.9424442  | -11.8040879 | 1.2650454  |
| N  | -5.2202821  | -11.3365375 | 1.4436478  |
| C  | -3.2965326  | -11.9702535 | 0.0000000  |
| C  | -3.9424442  | -11.8040879 | -1.2650454 |
| C  | -3.3366364  | -12.1079728 | -2.5464225 |
| C  | -4.2825795  | -11.8246168 | -3.5064238 |
| C  | -5.4497944  | -11.3243003 | -2.8081519 |
| N  | -5.2202821  | -11.3365375 | -1.4436478 |
| C  | -6.6086372  | -10.8329117 | -3.4276679 |
| C  | -7.7050356  | -10.2153230 | -2.8085539 |
| C  | -8.8123441  | -9.5930012  | -3.5066558 |
| C  | -9.6122637  | -9.0142615  | -2.5466631 |
| C  | -9.0027629  | -9.3113180  | -1.2651943 |
| N  | -7.8551213  | -10.0418310 | -1.4436756 |
| C  | -9.5252659  | -8.8971790  | 0.0000000  |
| C  | -9.0027629  | -9.3113180  | 1.2651943  |
| C  | -9.6122637  | -9.0142615  | 2.5466631  |
| C  | -8.8123441  | -9.5930012  | 3.5066558  |
| C  | -7.7050356  | -10.2153230 | 2.8085539  |
| N  | -7.8551213  | -10.0418310 | 1.4436756  |

|    |             |             |             |
|----|-------------|-------------|-------------|
| C  | -6.6086372  | -10.8329117 | 3.4276679   |
| H  | -2.3212960  | -12.4957121 | 2.6825129   |
| H  | -4.1950450  | -11.9302924 | 4.5943157   |
| H  | -2.3212960  | -12.4957121 | -2.6825129  |
| H  | -4.1950450  | -11.9302924 | -4.5943157  |
| H  | -8.9493246  | -9.5871471  | -4.5945600  |
| H  | -10.5370765 | -8.4432534  | -2.6827832  |
| H  | -10.5370765 | -8.4432534  | 2.6827832   |
| H  | -8.9493246  | -9.5871471  | 4.5945600   |
| Zn | 11.1266855  | 0.0000000   | 13.1495025  |
| C  | 12.4429144  | -3.5070374  | 10.9946767  |
| C  | 12.8096322  | -2.5466010  | 10.0785824  |
| C  | 12.4544995  | -1.2652686  | 10.6566557  |
| C  | 11.8434835  | -2.8092985  | 12.1146555  |
| N  | 11.8760406  | -1.4443366  | 11.8879093  |
| C  | 11.2577327  | -3.4288294  | 13.2280172  |
| C  | 10.5555348  | -2.8090521  | 14.2723096  |
| C  | 9.8499820   | -3.5068249  | 15.3284387  |
| C  | 9.2139778   | -2.5462350  | 16.0830970  |
| C  | 9.5575880   | -1.2651823  | 15.4983193  |
| N  | 10.3725159  | -1.4442463  | 14.4088254  |
| C  | 9.1069011   | 0.0000000   | 15.9893334  |
| C  | 9.5575880   | 1.2651823   | 15.4983193  |
| C  | 9.2139778   | 2.5462350   | 16.0830970  |
| C  | 9.8499820   | 3.5068249   | 15.3284387  |
| C  | 10.5555348  | 2.8090521   | 14.2723096  |
| N  | 10.3725159  | 1.4442463   | 14.4088254  |
| C  | 11.2577327  | 3.4288294   | 13.2280172  |
| C  | 11.8434835  | 2.8092985   | 12.1146555  |
| C  | 12.4429144  | 3.5070374   | 10.9946767  |
| C  | 12.8096322  | 2.5466010   | 10.0785824  |
| C  | 12.4544995  | 1.2652686   | 10.6566557  |
| N  | 11.8760406  | 1.4443366   | 11.8879093  |
| C  | 12.6807065  | 0.0000000   | 10.0300630  |
| H  | 12.5555181  | -4.5949153  | 10.9159859  |
| H  | 13.2860222  | -2.6821960  | 9.1016339   |
| H  | 9.8330551   | -4.5947565  | 15.4643410  |
| H  | 8.5752298   | -2.6816613  | 16.9625726  |
| H  | 8.5752298   | 2.6816613   | 16.9625726  |
| H  | 9.8330551   | 4.5947565   | 15.4643410  |
| H  | 12.5555181  | 4.5949153   | 10.9159859  |
| H  | 13.2860222  | 2.6821960   | 9.1016339   |
| Zn | 11.1266855  | 0.0000000   | -13.1495025 |
| C  | 9.8499820   | -3.5068249  | -15.3284387 |
| C  | 9.2139778   | -2.5462350  | -16.0830970 |
| C  | 9.5575880   | -1.2651823  | -15.4983193 |
| C  | 10.5555348  | -2.8090521  | -14.2723096 |
| N  | 10.3725159  | -1.4442463  | -14.4088254 |
| C  | 11.2577327  | -3.4288294  | -13.2280172 |



|    |             |            |             |
|----|-------------|------------|-------------|
| C  | 11.8434835  | -2.8092985 | -12.1146555 |
| C  | 12.4429144  | -3.5070374 | -10.9946767 |
| C  | 12.8096322  | -2.5466010 | -10.0785824 |
| C  | 12.4544995  | -1.2652686 | -10.6566557 |
| N  | 11.8760406  | -1.4443366 | -11.8879093 |
| C  | 12.6807065  | 0.0000000  | -10.0300630 |
| C  | 12.4544995  | 1.2652686  | -10.6566557 |
| C  | 12.8096322  | 2.5466010  | -10.0785824 |
| C  | 12.4429144  | 3.5070374  | -10.9946767 |
| C  | 11.8434835  | 2.8092985  | -12.1146555 |
| N  | 11.8760406  | 1.4443366  | -11.8879093 |
| C  | 11.2577327  | 3.4288294  | -13.2280172 |
| C  | 10.5555348  | 2.8090521  | -14.2723096 |
| C  | 9.8499820   | 3.5068249  | -15.3284387 |
| C  | 9.2139778   | 2.5462350  | -16.0830970 |
| C  | 9.5575880   | 1.2651823  | -15.4983193 |
| N  | 10.3725159  | 1.4442463  | -14.4088254 |
| C  | 9.1069011   | 0.0000000  | -15.9893334 |
| H  | 9.8330551   | -4.5947565 | -15.4643410 |
| H  | 8.5752298   | -2.6816613 | -16.9625726 |
| H  | 12.5555181  | -4.5949153 | -10.9159859 |
| H  | 13.2860222  | -2.6821960 | -9.1016339  |
| H  | 13.2860222  | 2.6821960  | -9.1016339  |
| H  | 12.5555181  | 4.5949153  | -10.9159859 |
| H  | 9.8330551   | 4.5947565  | -15.4643410 |
| H  | 8.5752298   | 2.6816613  | -16.9625726 |
| Zn | -11.1266855 | 0.0000000  | -13.1495025 |
| C  | -12.4429144 | -3.5070374 | -10.9946767 |
| C  | -12.8096322 | -2.5466010 | -10.0785824 |
| C  | -12.4544995 | -1.2652686 | -10.6566557 |
| C  | -11.8434835 | -2.8092985 | -12.1146555 |
| N  | -11.8760406 | -1.4443366 | -11.8879093 |
| C  | -11.2577327 | -3.4288294 | -13.2280172 |
| C  | -10.5555348 | -2.8090521 | -14.2723096 |
| C  | -9.8499820  | -3.5068249 | -15.3284387 |
| C  | -9.2139778  | -2.5462350 | -16.0830970 |
| C  | -9.5575880  | -1.2651823 | -15.4983193 |
| N  | -10.3725159 | -1.4442463 | -14.4088254 |
| C  | -9.1069011  | 0.0000000  | -15.9893334 |
| C  | -9.5575880  | 1.2651823  | -15.4983193 |
| C  | -9.2139778  | 2.5462350  | -16.0830970 |
| C  | -9.8499820  | 3.5068249  | -15.3284387 |
| C  | -10.5555348 | 2.8090521  | -14.2723096 |
| N  | -10.3725159 | 1.4442463  | -14.4088254 |
| C  | -11.2577327 | 3.4288294  | -13.2280172 |
| C  | -11.8434835 | 2.8092985  | -12.1146555 |
| C  | -12.4429144 | 3.5070374  | -10.9946767 |
| C  | -12.8096322 | 2.5466010  | -10.0785824 |
| C  | -12.4544995 | 1.2652686  | -10.6566557 |

|    |             |            |             |
|----|-------------|------------|-------------|
| N  | -11.8760406 | 1.4443366  | -11.8879093 |
| C  | -12.6807065 | 0.0000000  | -10.0300630 |
| H  | -12.5555181 | -4.5949153 | -10.9159859 |
| H  | -13.2860222 | -2.6821960 | -9.1016339  |
| H  | -9.8330551  | -4.5947565 | -15.4643410 |
| H  | -8.5752298  | -2.6816613 | -16.9625726 |
| H  | -8.5752298  | 2.6816613  | -16.9625726 |
| H  | -9.8330551  | 4.5947565  | -15.4643410 |
| H  | -12.5555181 | 4.5949153  | -10.9159859 |
| H  | -13.2860222 | 2.6821960  | -9.1016339  |
| Zn | -11.1266855 | 0.0000000  | 13.1495025  |
| C  | -9.8499820  | -3.5068249 | 15.3284387  |
| C  | -9.2139778  | -2.5462350 | 16.0830970  |
| C  | -9.5575880  | -1.2651823 | 15.4983193  |
| C  | -10.5555348 | -2.8090521 | 14.2723096  |
| N  | -10.3725159 | -1.4442463 | 14.4088254  |
| C  | -11.2577327 | -3.4288294 | 13.2280172  |
| C  | -11.8434835 | -2.8092985 | 12.1146555  |
| C  | -12.4429144 | -3.5070374 | 10.9946767  |
| C  | -12.8096322 | -2.5466010 | 10.0785824  |
| C  | -12.4544995 | -1.2652686 | 10.6566557  |
| N  | -11.8760406 | -1.4443366 | 11.8879093  |
| C  | -12.6807065 | 0.0000000  | 10.0300630  |
| C  | -12.4544995 | 1.2652686  | 10.6566557  |
| C  | -12.8096322 | 2.5466010  | 10.0785824  |
| C  | -12.4429144 | 3.5070374  | 10.9946767  |
| C  | -11.8434835 | 2.8092985  | 12.1146555  |
| N  | -11.8760406 | 1.4443366  | 11.8879093  |
| C  | -11.2577327 | 3.4288294  | 13.2280172  |
| C  | -10.5555348 | 2.8090521  | 14.2723096  |
| C  | -9.8499820  | 3.5068249  | 15.3284387  |
| C  | -9.2139778  | 2.5462350  | 16.0830970  |
| C  | -9.5575880  | 1.2651823  | 15.4983193  |
| N  | -10.3725159 | 1.4442463  | 14.4088254  |
| C  | -9.1069011  | 0.0000000  | 15.9893334  |
| H  | -9.8330551  | -4.5947565 | 15.4643410  |
| H  | -8.5752298  | -2.6816613 | 16.9625726  |
| H  | -12.5555181 | -4.5949153 | 10.9159859  |
| H  | -13.2860222 | -2.6821960 | 9.1016339   |
| H  | -13.2860222 | 2.6821960  | 9.1016339   |
| H  | -12.5555181 | 4.5949153  | 10.9159859  |
| H  | -9.8330551  | 4.5947565  | 15.4643410  |
| H  | -8.5752298  | 2.6816613  | 16.9625726  |
| Zn | 0.0000000   | 0.0000000  | 19.6749312  |
| C  | 2.5244958   | -3.5053536 | 19.6965401  |
| C  | 3.4952022   | -2.5459900 | 19.5106014  |
| C  | 2.8163802   | -1.2652277 | 19.5054518  |
| C  | 1.2563837   | -2.8077729 | 19.7726430  |
| N  | 1.4661311   | -1.4437321 | 19.6706506  |

|    |            |            |             |
|----|------------|------------|-------------|
| C  | 0.0000000  | -3.4267963 | 19.8522129  |
| C  | -1.2563837 | -2.8077729 | 19.7726430  |
| C  | -2.5244958 | -3.5053536 | 19.6965401  |
| C  | -3.4952022 | -2.5459900 | 19.5106014  |
| C  | -2.8163802 | -1.2652277 | 19.5054518  |
| N  | -1.4661311 | -1.4437321 | 19.6706506  |
| C  | -3.4647686 | 0.0000000  | 19.3490600  |
| C  | -2.8163802 | 1.2652277  | 19.5054518  |
| C  | -3.4952022 | 2.5459900  | 19.5106014  |
| C  | -2.5244958 | 3.5053536  | 19.6965401  |
| C  | -1.2563837 | 2.8077729  | 19.7726430  |
| N  | -1.4661311 | 1.4437321  | 19.6706506  |
| C  | 0.0000000  | 3.4267963  | 19.8522129  |
| C  | 1.2563837  | 2.8077729  | 19.7726430  |
| C  | 2.5244958  | 3.5053536  | 19.6965401  |
| C  | 3.4952022  | 2.5459900  | 19.5106014  |
| C  | 2.8163802  | 1.2652277  | 19.5054518  |
| N  | 1.4661311  | 1.4437321  | 19.6706506  |
| C  | 3.4647686  | 0.0000000  | 19.3490600  |
| H  | 2.6516774  | -4.5925984 | 19.7604805  |
| H  | 4.5760943  | -2.6821450 | 19.3963114  |
| H  | -2.6516774 | -4.5925984 | 19.7604805  |
| H  | -4.5760943 | -2.6821450 | 19.3963114  |
| H  | -4.5760943 | 2.6821450  | 19.3963114  |
| H  | -2.6516774 | 4.5925984  | 19.7604805  |
| H  | 2.6516774  | 4.5925984  | 19.7604805  |
| H  | 4.5760943  | 2.6821450  | 19.3963114  |
| Zn | 0.0000000  | 0.0000000  | -19.6749312 |
| C  | 2.5244958  | -3.5053536 | -19.6965401 |
| C  | 3.4952022  | -2.5459900 | -19.5106014 |
| C  | 2.8163802  | -1.2652277 | -19.5054518 |
| C  | 1.2563837  | -2.8077729 | -19.7726430 |
| N  | 1.4661311  | -1.4437321 | -19.6706506 |
| C  | 0.0000000  | -3.4267963 | -19.8522129 |
| C  | -1.2563837 | -2.8077729 | -19.7726430 |
| C  | -2.5244958 | -3.5053536 | -19.6965401 |
| C  | -3.4952022 | -2.5459900 | -19.5106014 |
| C  | -2.8163802 | -1.2652277 | -19.5054518 |
| N  | -1.4661311 | -1.4437321 | -19.6706506 |
| C  | -3.4647686 | 0.0000000  | -19.3490600 |
| C  | -2.8163802 | 1.2652277  | -19.5054518 |
| C  | -3.4952022 | 2.5459900  | -19.5106014 |
| C  | -2.5244958 | 3.5053536  | -19.6965401 |
| C  | -1.2563837 | 2.8077729  | -19.7726430 |
| N  | -1.4661311 | 1.4437321  | -19.6706506 |
| C  | 0.0000000  | 3.4267963  | -19.8522129 |
| C  | 1.2563837  | 2.8077729  | -19.7726430 |
| C  | 2.5244958  | 3.5053536  | -19.6965401 |
| C  | 3.4952022  | 2.5459900  | -19.5106014 |

|   |             |             |             |
|---|-------------|-------------|-------------|
| C | 2.8163802   | 1.2652277   | -19.5054518 |
| N | 1.4661311   | 1.4437321   | -19.6706506 |
| C | 3.4647686   | 0.0000000   | -19.3490600 |
| H | 2.6516774   | -4.5925984  | -19.7604805 |
| H | 4.5760943   | -2.6821450  | -19.3963114 |
| H | -2.6516774  | -4.5925984  | -19.7604805 |
| H | -4.5760943  | -2.6821450  | -19.3963114 |
| H | -4.5760943  | 2.6821450   | -19.3963114 |
| H | -2.6516774  | 4.5925984   | -19.7604805 |
| H | 2.6516774   | 4.5925984   | -19.7604805 |
| H | 4.5760943   | 2.6821450   | -19.3963114 |
| C | 12.7171825  | -4.7870452  | 0.0000000   |
| C | 12.1419039  | -5.8910404  | 0.0000000   |
| C | 11.3880098  | -7.0125675  | 0.0000000   |
| C | 10.5773416  | -7.9575700  | 0.0000000   |
| C | 13.6439955  | 0.0000000   | 4.8903479   |
| C | 13.5563918  | 0.0000000   | 6.1311917   |
| C | 13.3704191  | 0.0000000   | 7.4696467   |
| C | 13.1089162  | 0.0000000   | 8.6863028   |
| C | 12.7171825  | 4.7870452   | 0.0000000   |
| C | 12.1419039  | 5.8910404   | 0.0000000   |
| C | 11.3880098  | 7.0125675   | 0.0000000   |
| C | 10.5773416  | 7.9575700   | 0.0000000   |
| C | 13.6439955  | 0.0000000   | -4.8903479  |
| C | 13.5563918  | 0.0000000   | -6.1311917  |
| C | 13.3704191  | 0.0000000   | -7.4696467  |
| C | 13.1089162  | 0.0000000   | -8.6863028  |
| C | -12.7171825 | -4.7870452  | 0.0000000   |
| C | -12.1419039 | -5.8910404  | 0.0000000   |
| C | -11.3880098 | -7.0125675  | 0.0000000   |
| C | -10.5773416 | -7.9575700  | 0.0000000   |
| C | -13.6439955 | 0.0000000   | -4.8903479  |
| C | -13.5563918 | 0.0000000   | -6.1311917  |
| C | -13.3704191 | 0.0000000   | -7.4696467  |
| C | -13.1089162 | 0.0000000   | -8.6863028  |
| C | -12.7171825 | 4.7870452   | 0.0000000   |
| C | -12.1419039 | 5.8910404   | 0.0000000   |
| C | -11.3880098 | 7.0125675   | 0.0000000   |
| C | -10.5773416 | 7.9575700   | 0.0000000   |
| C | -13.6439955 | 0.0000000   | 4.8903479   |
| C | -13.5563918 | 0.0000000   | 6.1311917   |
| C | -13.3704191 | 0.0000000   | 7.4696467   |
| C | -13.1089162 | 0.0000000   | 8.6863028   |
| C | 1.9155467   | 12.2578089  | 0.0000000   |
| C | 0.6757151   | 12.3697128  | 0.0000000   |
| C | -0.6757151  | 12.3697128  | 0.0000000   |
| C | -1.9155467  | 12.2578089  | 0.0000000   |
| C | 1.9155467   | -12.2578089 | 0.0000000   |
| C | 0.6757151   | -12.3697128 | 0.0000000   |

|   |             |             |             |
|---|-------------|-------------|-------------|
| C | -0.6757151  | -12.3697128 | 0.0000000   |
| C | -1.9155467  | -12.2578089 | 0.0000000   |
| C | 8.0983608   | 0.0000000   | 16.9751585  |
| C | 7.1039856   | 0.0000000   | 17.7241248  |
| C | 5.9449750   | 0.0000000   | 18.4185571  |
| C | 4.8143946   | 0.0000000   | 18.9401110  |
| C | 8.0983608   | 0.0000000   | -16.9751585 |
| C | 7.1039856   | 0.0000000   | -17.7241248 |
| C | 5.9449750   | 0.0000000   | -18.4185571 |
| C | 4.8143946   | 0.0000000   | -18.9401110 |
| C | -8.0983608  | 0.0000000   | -16.9751585 |
| C | -7.1039856  | 0.0000000   | -17.7241248 |
| C | -5.9449750  | 0.0000000   | -18.4185571 |
| C | -4.8143946  | 0.0000000   | -18.9401110 |
| C | -8.0983608  | 0.0000000   | 16.9751585  |
| C | -7.1039856  | 0.0000000   | 17.7241248  |
| C | -5.9449750  | 0.0000000   | 18.4185571  |
| C | -4.8143946  | 0.0000000   | 18.9401110  |
| H | 6.6347209   | 10.8863764  | 4.5261218   |
| H | 6.6347209   | 10.8863764  | -4.5261218  |
| H | 6.6347209   | -10.8863764 | -4.5261218  |
| H | 6.6347209   | -10.8863764 | 4.5261218   |
| H | -6.6347209  | 10.8863764  | 4.5261218   |
| H | -6.6347209  | 10.8863764  | -4.5261218  |
| H | -6.6347209  | -10.8863764 | -4.5261218  |
| H | -6.6347209  | -10.8863764 | 4.5261218   |
| H | 11.3083995  | -4.5273062  | 13.2583139  |
| H | 11.3083995  | 4.5273062   | 13.2583139  |
| H | 11.3083995  | -4.5273062  | -13.2583139 |
| H | 11.3083995  | 4.5273062   | -13.2583139 |
| H | -11.3083995 | -4.5273062  | -13.2583139 |
| H | -11.3083995 | 4.5273062   | -13.2583139 |
| H | -11.3083995 | -4.5273062  | 13.2583139  |
| H | -11.3083995 | 4.5273062   | 13.2583139  |
| H | 0.0000000   | -4.5247636  | 19.9200585  |
| H | 0.0000000   | 4.5247636   | 19.9200585  |
| H | 0.0000000   | -4.5247636  | -19.9200585 |
| H | 0.0000000   | 4.5247636   | -19.9200585 |

### Molecule 3

550

Energy =

|    |           |            |            |
|----|-----------|------------|------------|
| Zn | 0.0000000 | 0.0000000  | 13.7409557 |
| C  | 2.5354998 | -3.5018209 | 13.7658056 |
| C  | 3.4901049 | -2.5366947 | 13.5260780 |
| C  | 2.8000768 | -1.2664886 | 13.5177641 |
| C  | 1.2665761 | -2.8145395 | 13.8636714 |
| N  | 1.4526435 | -1.4560619 | 13.7298631 |
| C  | 0.0000000 | -3.4658292 | 13.9809325 |

|    |            |            |            |
|----|------------|------------|------------|
| C  | -1.2665761 | -2.8145395 | 13.8636714 |
| C  | -2.5354998 | -3.5018209 | 13.7658056 |
| C  | -3.4901049 | -2.5366947 | 13.5260780 |
| C  | -2.8000768 | -1.2664886 | 13.5177641 |
| N  | -1.4526435 | -1.4560619 | 13.7298631 |
| C  | -3.4319573 | 0.0000000  | 13.3234382 |
| C  | -2.8000768 | 1.2664886  | 13.5177641 |
| C  | -3.4901049 | 2.5366947  | 13.5260780 |
| C  | -2.5354998 | 3.5018209  | 13.7658056 |
| C  | -1.2665761 | 2.8145395  | 13.8636714 |
| N  | -1.4526435 | 1.4560619  | 13.7298631 |
| C  | 0.0000000  | 3.4658292  | 13.9809325 |
| C  | 1.2665761  | 2.8145395  | 13.8636714 |
| C  | 2.5354998  | 3.5018209  | 13.7658056 |
| C  | 3.4901049  | 2.5366947  | 13.5260780 |
| C  | 2.8000768  | 1.2664886  | 13.5177641 |
| N  | 1.4526435  | 1.4560619  | 13.7298631 |
| C  | 3.4319573  | 0.0000000  | 13.3234382 |
| H  | 2.6704478  | -4.5854943 | 13.8475975 |
| H  | 4.5677390  | -2.6670018 | 13.3800023 |
| H  | -2.6704478 | -4.5854943 | 13.8475975 |
| H  | -4.5677390 | -2.6670018 | 13.3800023 |
| H  | -4.5677390 | 2.6670018  | 13.3800023 |
| H  | -2.6704478 | 4.5854943  | 13.8475975 |
| H  | 2.6704478  | 4.5854943  | 13.8475975 |
| H  | 4.5677390  | 2.6670018  | 13.3800023 |
| Zn | 10.5615091 | 0.0000000  | 6.5547937  |
| H  | 10.7548391 | 4.5263309  | 6.6468561  |
| H  | 10.7548391 | -4.5263309 | 6.6468561  |
| C  | 11.9406957 | 2.5464542  | 3.3359610  |
| C  | 11.6660632 | 3.5065863  | 4.2842928  |
| C  | 11.1791740 | 2.8082744  | 5.4571346  |
| C  | 11.6444212 | 1.2650071  | 3.9455011  |
| N  | 11.1901446 | 1.4436838  | 5.2281306  |
| C  | 11.8055684 | 0.0000000  | 3.2984114  |
| C  | 11.6444212 | -1.2650071 | 3.9455011  |
| C  | 11.9406957 | -2.5464542 | 3.3359610  |
| C  | 11.6660632 | -3.5065863 | 4.2842928  |
| C  | 11.1791740 | -2.8082744 | 5.4571346  |
| N  | 11.1901446 | -1.4436838 | 5.2281306  |
| C  | 10.7016923 | -3.4278336 | 6.6217935  |
| C  | 10.0991340 | -2.8086827 | 7.7264949  |
| C  | 9.4912590  | -3.5066996 | 8.8418564  |
| C  | 8.9236919  | -2.5465100 | 9.6494859  |
| C  | 9.2128575  | -1.2650854 | 9.0361738  |
| N  | 9.9279386  | -1.4437002 | 7.8788672  |
| C  | 8.8057508  | 0.0000000  | 9.5643097  |
| C  | 9.2128575  | 1.2650854  | 9.0361738  |
| C  | 8.9236919  | 2.5465100  | 9.6494859  |

|    |             |            |             |
|----|-------------|------------|-------------|
| C  | 9.4912590   | 3.5066996  | 8.8418564   |
| C  | 10.0991340  | 2.8086827  | 7.7264949   |
| N  | 9.9279386   | 1.4437002  | 7.8788672   |
| C  | 10.7016923  | 3.4278336  | 6.6217935   |
| H  | 12.3176866  | 2.6824488  | 2.3165819   |
| H  | 11.7696958  | 4.5945481  | 4.1952079   |
| H  | 12.3176866  | -2.6824488 | 2.3165819   |
| H  | 11.7696958  | -4.5945481 | 4.1952079   |
| H  | 9.4867931   | -4.5945925 | 8.9789411   |
| H  | 8.3651453   | -2.6825608 | 10.5818378  |
| H  | 8.3651453   | 2.6825608  | 10.5818378  |
| H  | 9.4867931   | 4.5945925  | 8.9789411   |
| Zn | -10.5615091 | 0.0000000  | 6.5547937   |
| H  | -10.7548391 | 4.5263309  | 6.6468561   |
| H  | -10.7548391 | -4.5263309 | 6.6468561   |
| C  | -9.4912590  | -3.5066996 | 8.8418564   |
| C  | -8.9236919  | -2.5465100 | 9.6494859   |
| C  | -9.2128575  | -1.2650854 | 9.0361738   |
| C  | -10.0991340 | -2.8086827 | 7.7264949   |
| N  | -9.9279386  | -1.4437002 | 7.8788672   |
| C  | -10.7016923 | -3.4278336 | 6.6217935   |
| C  | -11.1791740 | -2.8082744 | 5.4571346   |
| C  | -11.6660632 | -3.5065863 | 4.2842928   |
| C  | -11.9406957 | -2.5464542 | 3.3359610   |
| C  | -11.6444212 | -1.2650071 | 3.9455011   |
| N  | -11.1901446 | -1.4436838 | 5.2281306   |
| C  | -11.8055684 | 0.0000000  | 3.2984114   |
| C  | -11.6444212 | 1.2650071  | 3.9455011   |
| C  | -11.9406957 | 2.5464542  | 3.3359610   |
| C  | -11.6660632 | 3.5065863  | 4.2842928   |
| C  | -11.1791740 | 2.8082744  | 5.4571346   |
| N  | -11.1901446 | 1.4436838  | 5.2281306   |
| C  | -10.7016923 | 3.4278336  | 6.6217935   |
| C  | -10.0991340 | 2.8086827  | 7.7264949   |
| C  | -9.4912590  | 3.5066996  | 8.8418564   |
| C  | -8.9236919  | 2.5465100  | 9.6494859   |
| C  | -9.2128575  | 1.2650854  | 9.0361738   |
| N  | -9.9279386  | 1.4437002  | 7.8788672   |
| C  | -8.8057508  | 0.0000000  | 9.5643097   |
| H  | -9.4867931  | -4.5945925 | 8.9789411   |
| H  | -8.3651453  | -2.6825608 | 10.5818378  |
| H  | -11.7696958 | -4.5945481 | 4.1952079   |
| H  | -12.3176866 | -2.6824488 | 2.3165819   |
| H  | -12.3176866 | 2.6824488  | 2.3165819   |
| H  | -11.7696958 | 4.5945481  | 4.1952079   |
| H  | -9.4867931  | 4.5945925  | 8.9789411   |
| H  | -8.3651453  | 2.6825608  | 10.5818378  |
| Zn | 0.0000000   | 0.0000000  | -13.7409557 |
| C  | 2.5354998   | 3.5018209  | -13.7658056 |

|    |             |            |             |
|----|-------------|------------|-------------|
| C  | 3.4901049   | 2.5366947  | -13.5260780 |
| C  | 2.8000768   | 1.2664886  | -13.5177641 |
| C  | 1.2665761   | 2.8145395  | -13.8636714 |
| N  | 1.4526435   | 1.4560619  | -13.7298631 |
| C  | 0.0000000   | 3.4658292  | -13.9809325 |
| C  | -1.2665761  | 2.8145395  | -13.8636714 |
| C  | -2.5354998  | 3.5018209  | -13.7658056 |
| C  | -3.4901049  | 2.5366947  | -13.5260780 |
| C  | -2.8000768  | 1.2664886  | -13.5177641 |
| N  | -1.4526435  | 1.4560619  | -13.7298631 |
| C  | -3.4319573  | 0.0000000  | -13.3234382 |
| C  | -2.8000768  | -1.2664886 | -13.5177641 |
| C  | -3.4901049  | -2.5366947 | -13.5260780 |
| C  | -2.5354998  | -3.5018209 | -13.7658056 |
| C  | -1.2665761  | -2.8145395 | -13.8636714 |
| N  | -1.4526435  | -1.4560619 | -13.7298631 |
| C  | 0.0000000   | -3.4658292 | -13.9809325 |
| C  | 1.2665761   | -2.8145395 | -13.8636714 |
| C  | 2.5354998   | -3.5018209 | -13.7658056 |
| C  | 3.4901049   | -2.5366947 | -13.5260780 |
| C  | 2.8000768   | -1.2664886 | -13.5177641 |
| N  | 1.4526435   | -1.4560619 | -13.7298631 |
| C  | 3.4319573   | 0.0000000  | -13.3234382 |
| H  | 2.6704478   | 4.5854943  | -13.8475975 |
| H  | 4.5677390   | 2.6670018  | -13.3800023 |
| H  | -2.6704478  | 4.5854943  | -13.8475975 |
| H  | -4.5677390  | 2.6670018  | -13.3800023 |
| H  | -4.5677390  | -2.6670018 | -13.3800023 |
| H  | -2.6704478  | -4.5854943 | -13.8475975 |
| H  | 2.6704478   | -4.5854943 | -13.8475975 |
| H  | 4.5677390   | -2.6670018 | -13.3800023 |
| Zn | -10.5615091 | 0.0000000  | -6.5547937  |
| H  | -10.7548391 | 4.5263309  | -6.6468561  |
| H  | -10.7548391 | -4.5263309 | -6.6468561  |
| C  | -8.9236919  | -2.5465100 | -9.6494859  |
| C  | -9.4912590  | -3.5066996 | -8.8418564  |
| C  | -10.0991340 | -2.8086827 | -7.7264949  |
| C  | -9.2128575  | -1.2650854 | -9.0361738  |
| N  | -9.9279386  | -1.4437002 | -7.8788672  |
| C  | -8.8057508  | 0.0000000  | -9.5643097  |
| C  | -9.2128575  | 1.2650854  | -9.0361738  |
| C  | -8.9236919  | 2.5465100  | -9.6494859  |
| C  | -9.4912590  | 3.5066996  | -8.8418564  |
| C  | -10.0991340 | 2.8086827  | -7.7264949  |
| N  | -9.9279386  | 1.4437002  | -7.8788672  |
| C  | -10.7016923 | 3.4278336  | -6.6217935  |
| C  | -11.1791740 | 2.8082744  | -5.4571346  |
| C  | -11.6660632 | 3.5065863  | -4.2842928  |
| C  | -11.9406957 | 2.5464542  | -3.3359610  |



|    |             |            |             |
|----|-------------|------------|-------------|
| C  | -11.6444212 | 1.2650071  | -3.9455011  |
| N  | -11.1901446 | 1.4436838  | -5.2281306  |
| C  | -11.8055684 | 0.0000000  | -3.2984114  |
| C  | -11.6444212 | -1.2650071 | -3.9455011  |
| C  | -11.9406957 | -2.5464542 | -3.3359610  |
| C  | -11.6660632 | -3.5065863 | -4.2842928  |
| C  | -11.1791740 | -2.8082744 | -5.4571346  |
| N  | -11.1901446 | -1.4436838 | -5.2281306  |
| C  | -10.7016923 | -3.4278336 | -6.6217935  |
| H  | -8.3651453  | -2.6825608 | -10.5818378 |
| H  | -9.4867931  | -4.5945925 | -8.9789411  |
| H  | -8.3651453  | 2.6825608  | -10.5818378 |
| H  | -9.4867931  | 4.5945925  | -8.9789411  |
| H  | -11.7696958 | 4.5945481  | -4.1952079  |
| H  | -12.3176866 | 2.6824488  | -2.3165819  |
| H  | -12.3176866 | -2.6824488 | -2.3165819  |
| H  | -11.7696958 | -4.5945481 | -4.1952079  |
| Zn | 10.5615091  | 0.0000000  | -6.5547937  |
| H  | 10.7548391  | 4.5263309  | -6.6468561  |
| H  | 10.7548391  | -4.5263309 | -6.6468561  |
| C  | 11.6660632  | 3.5065863  | -4.2842928  |
| C  | 11.9406957  | 2.5464542  | -3.3359610  |
| C  | 11.6444212  | 1.2650071  | -3.9455011  |
| C  | 11.1791740  | 2.8082744  | -5.4571346  |
| N  | 11.1901446  | 1.4436838  | -5.2281306  |
| C  | 10.7016923  | 3.4278336  | -6.6217935  |
| C  | 10.0991340  | 2.8086827  | -7.7264949  |
| C  | 9.4912590   | 3.5066996  | -8.8418564  |
| C  | 8.9236919   | 2.5465100  | -9.6494859  |
| C  | 9.2128575   | 1.2650854  | -9.0361738  |
| N  | 9.9279386   | 1.4437002  | -7.8788672  |
| C  | 8.8057508   | 0.0000000  | -9.5643097  |
| C  | 9.2128575   | -1.2650854 | -9.0361738  |
| C  | 8.9236919   | -2.5465100 | -9.6494859  |
| C  | 9.4912590   | -3.5066996 | -8.8418564  |
| C  | 10.0991340  | -2.8086827 | -7.7264949  |
| N  | 9.9279386   | -1.4437002 | -7.8788672  |
| C  | 10.7016923  | -3.4278336 | -6.6217935  |
| C  | 11.1791740  | -2.8082744 | -5.4571346  |
| C  | 11.6660632  | -3.5065863 | -4.2842928  |
| C  | 11.9406957  | -2.5464542 | -3.3359610  |
| C  | 11.6444212  | -1.2650071 | -3.9455011  |
| N  | 11.1901446  | -1.4436838 | -5.2281306  |
| C  | 11.8055684  | 0.0000000  | -3.2984114  |
| H  | 11.7696958  | 4.5945481  | -4.1952079  |
| H  | 12.3176866  | 2.6824488  | -2.3165819  |
| H  | 9.4867931   | 4.5945925  | -8.9789411  |
| H  | 8.3651453   | 2.6825608  | -10.5818378 |
| H  | 8.3651453   | -2.6825608 | -10.5818378 |

|    |            |             |            |
|----|------------|-------------|------------|
| H  | 9.4867931  | -4.5945925  | -8.9789411 |
| H  | 11.7696958 | -4.5945481  | -4.1952079 |
| H  | 12.3176866 | -2.6824488  | -2.3165819 |
| Zn | 0.0000000  | -13.5662028 | 13.7194043 |
| H  | 4.5311934  | -13.5961453 | 13.8669725 |
| H  | -4.5311934 | -13.5961453 | 13.8669725 |
| C  | 2.5467903  | -16.9830952 | 12.9355437 |
| C  | 3.5090535  | -16.0458768 | 13.2381306 |
| C  | 2.8110254  | -14.8105280 | 13.5321122 |
| C  | 1.2651441  | -16.3182682 | 13.0655706 |
| N  | 1.4449969  | -15.0072686 | 13.4304285 |
| C  | 0.0000000  | -16.9450153 | 12.8409228 |
| C  | -1.2651441 | -16.3182682 | 13.0655706 |
| C  | -2.5467903 | -16.9830952 | 12.9355437 |
| C  | -3.5090535 | -16.0458768 | 13.2381306 |
| C  | -2.8110254 | -14.8105280 | 13.5321122 |
| N  | -1.4449969 | -15.0072686 | 13.4304285 |
| C  | -3.4319665 | -13.5877531 | 13.8255964 |
| C  | -2.8113864 | -12.3468097 | 14.0265358 |
| C  | -3.5092810 | -11.0947219 | 14.2395881 |
| C  | -2.5472106 | -10.1138519 | 14.3267016 |
| C  | -1.2653857 | -10.7763199 | 14.1834793 |
| N  | -1.4452694 | -12.1251728 | 14.0055303 |
| C  | 0.0000000  | -10.1124618 | 14.2278118 |
| C  | 1.2653857  | -10.7763199 | 14.1834793 |
| C  | 2.5472106  | -10.1138519 | 14.3267016 |
| C  | 3.5092810  | -11.0947219 | 14.2395881 |
| C  | 2.8113864  | -12.3468097 | 14.0265358 |
| N  | 1.4452694  | -12.1251728 | 14.0055303 |
| C  | 3.4319665  | -13.5877531 | 13.8255964 |
| H  | 2.6813642  | -18.0332088 | 12.6546535 |
| H  | 4.5979585  | -16.1740417 | 13.2522932 |
| H  | -2.6813642 | -18.0332088 | 12.6546535 |
| H  | -4.5979585 | -16.1740417 | 13.2522932 |
| H  | -4.5980554 | -10.9824732 | 14.3049463 |
| H  | -2.6819319 | -9.0378844  | 14.4806198 |
| H  | 2.6819319  | -9.0378844  | 14.4806198 |
| H  | 4.5980554  | -10.9824732 | 14.3049463 |
| Zn | 0.0000000  | 13.5662028  | 13.7194043 |
| H  | 4.5311934  | 13.5961453  | 13.8669725 |
| H  | -4.5311934 | 13.5961453  | 13.8669725 |
| C  | 2.5472106  | 10.1138519  | 14.3267016 |
| C  | 3.5092810  | 11.0947219  | 14.2395881 |
| C  | 2.8113864  | 12.3468097  | 14.0265358 |
| C  | 1.2653857  | 10.7763199  | 14.1834793 |
| N  | 1.4452694  | 12.1251728  | 14.0055303 |
| C  | 0.0000000  | 10.1124618  | 14.2278118 |
| C  | -1.2653857 | 10.7763199  | 14.1834793 |
| C  | -2.5472106 | 10.1138519  | 14.3267016 |

|    |            |             |             |
|----|------------|-------------|-------------|
| C  | -3.5092810 | 11.0947219  | 14.2395881  |
| C  | -2.8113864 | 12.3468097  | 14.0265358  |
| N  | -1.4452694 | 12.1251728  | 14.0055303  |
| C  | -3.4319665 | 13.5877531  | 13.8255964  |
| C  | -2.8110254 | 14.8105280  | 13.5321122  |
| C  | -3.5090535 | 16.0458768  | 13.2381306  |
| C  | -2.5467903 | 16.9830952  | 12.9355437  |
| C  | -1.2651441 | 16.3182682  | 13.0655706  |
| N  | -1.4449969 | 15.0072686  | 13.4304285  |
| C  | 0.0000000  | 16.9450153  | 12.8409228  |
| C  | 1.2651441  | 16.3182682  | 13.0655706  |
| C  | 2.5467903  | 16.9830952  | 12.9355437  |
| C  | 3.5090535  | 16.0458768  | 13.2381306  |
| C  | 2.8110254  | 14.8105280  | 13.5321122  |
| N  | 1.4449969  | 15.0072686  | 13.4304285  |
| C  | 3.4319665  | 13.5877531  | 13.8255964  |
| H  | 2.6819319  | 9.0378844   | 14.4806198  |
| H  | 4.5980554  | 10.9824732  | 14.3049463  |
| H  | -2.6819319 | 9.0378844   | 14.4806198  |
| H  | -4.5980554 | 10.9824732  | 14.3049463  |
| H  | -4.5979585 | 16.1740417  | 13.2522932  |
| H  | -2.6813642 | 18.0332088  | 12.6546535  |
| H  | 2.6813642  | 18.0332088  | 12.6546535  |
| H  | 4.5979585  | 16.1740417  | 13.2522932  |
| Zn | 0.0000000  | -13.5662028 | -13.7194043 |
| H  | 4.5311934  | -13.5961453 | -13.8669725 |
| H  | -4.5311934 | -13.5961453 | -13.8669725 |
| C  | 2.5472106  | -10.1138519 | -14.3267016 |
| C  | 3.5092810  | -11.0947219 | -14.2395881 |
| C  | 2.8113864  | -12.3468097 | -14.0265358 |
| C  | 1.2653857  | -10.7763199 | -14.1834793 |
| N  | 1.4452694  | -12.1251728 | -14.0055303 |
| C  | 0.0000000  | -10.1124618 | -14.2278118 |
| C  | -1.2653857 | -10.7763199 | -14.1834793 |
| C  | -2.5472106 | -10.1138519 | -14.3267016 |
| C  | -3.5092810 | -11.0947219 | -14.2395881 |
| C  | -2.8113864 | -12.3468097 | -14.0265358 |
| N  | -1.4452694 | -12.1251728 | -14.0055303 |
| C  | -3.4319665 | -13.5877531 | -13.8255964 |
| C  | -2.8110254 | -14.8105280 | -13.5321122 |
| C  | -3.5090535 | -16.0458768 | -13.2381306 |
| C  | -2.5467903 | -16.9830952 | -12.9355437 |
| C  | -1.2651441 | -16.3182682 | -13.0655706 |
| N  | -1.4449969 | -15.0072686 | -13.4304285 |
| C  | 0.0000000  | -16.9450153 | -12.8409228 |
| C  | 1.2651441  | -16.3182682 | -13.0655706 |
| C  | 2.5467903  | -16.9830952 | -12.9355437 |
| C  | 3.5090535  | -16.0458768 | -13.2381306 |
| C  | 2.8110254  | -14.8105280 | -13.5321122 |

|    |            |             |             |
|----|------------|-------------|-------------|
| N  | 1.4449969  | -15.0072686 | -13.4304285 |
| C  | 3.4319665  | -13.5877531 | -13.8255964 |
| H  | 2.6819319  | -9.0378844  | -14.4806198 |
| H  | 4.5980554  | -10.9824732 | -14.3049463 |
| H  | -2.6819319 | -9.0378844  | -14.4806198 |
| H  | -4.5980554 | -10.9824732 | -14.3049463 |
| H  | -4.5979585 | -16.1740417 | -13.2522932 |
| H  | -2.6813642 | -18.0332088 | -12.6546535 |
| H  | 2.6813642  | -18.0332088 | -12.6546535 |
| H  | 4.5979585  | -16.1740417 | -13.2522932 |
| Zn | 0.0000000  | 13.5662028  | -13.7194043 |
| H  | 4.5311934  | 13.5961453  | -13.8669725 |
| H  | -4.5311934 | 13.5961453  | -13.8669725 |
| C  | 2.5467903  | 16.9830952  | -12.9355437 |
| C  | 3.5090535  | 16.0458768  | -13.2381306 |
| C  | 2.8110254  | 14.8105280  | -13.5321122 |
| C  | 1.2651441  | 16.3182682  | -13.0655706 |
| N  | 1.4449969  | 15.0072686  | -13.4304285 |
| C  | 0.0000000  | 16.9450153  | -12.8409228 |
| C  | -1.2651441 | 16.3182682  | -13.0655706 |
| C  | -2.5467903 | 16.9830952  | -12.9355437 |
| C  | -3.5090535 | 16.0458768  | -13.2381306 |
| C  | -2.8110254 | 14.8105280  | -13.5321122 |
| N  | -1.4449969 | 15.0072686  | -13.4304285 |
| C  | -3.4319665 | 13.5877531  | -13.8255964 |
| C  | -2.8113864 | 12.3468097  | -14.0265358 |
| C  | -3.5092810 | 11.0947219  | -14.2395881 |
| C  | -2.5472106 | 10.1138519  | -14.3267016 |
| C  | -1.2653857 | 10.7763199  | -14.1834793 |
| N  | -1.4452694 | 12.1251728  | -14.0055303 |
| C  | 0.0000000  | 10.1124618  | -14.2278118 |
| C  | 1.2653857  | 10.7763199  | -14.1834793 |
| C  | 2.5472106  | 10.1138519  | -14.3267016 |
| C  | 3.5092810  | 11.0947219  | -14.2395881 |
| C  | 2.8113864  | 12.3468097  | -14.0265358 |
| N  | 1.4452694  | 12.1251728  | -14.0055303 |
| C  | 3.4319665  | 13.5877531  | -13.8255964 |
| H  | 2.6813642  | 18.0332088  | -12.6546535 |
| H  | 4.5979585  | 16.1740417  | -13.2522932 |
| H  | -2.6813642 | 18.0332088  | -12.6546535 |
| H  | -4.5979585 | 16.1740417  | -13.2522932 |
| H  | -4.5980554 | 10.9824732  | -14.3049463 |
| H  | -2.6819319 | 9.0378844   | -14.4806198 |
| H  | 2.6819319  | 9.0378844   | -14.4806198 |
| H  | 4.5980554  | 10.9824732  | -14.3049463 |
| Zn | 0.0000000  | -24.5095657 | 6.4229608   |
| H  | 4.5260246  | -24.7088240 | 6.5404045   |
| H  | -4.5260246 | -24.7088240 | 6.5404045   |
| C  | 2.5460698  | -26.1542247 | 3.3331860   |

|    |            |             |            |
|----|------------|-------------|------------|
| C  | 3.5059569  | -25.8116031 | 4.2595717  |
| C  | 2.8084029  | -25.2287661 | 5.3883148  |
| C  | 1.2651989  | -25.8051651 | 3.9152128  |
| N  | 1.4439838  | -25.2530191 | 5.1585408  |
| C  | 0.0000000  | -26.0071420 | 3.2798746  |
| C  | -1.2651989 | -25.8051651 | 3.9152128  |
| C  | -2.5460698 | -26.1542247 | 3.3331860  |
| C  | -3.5059569 | -25.8116031 | 4.2595717  |
| C  | -2.8084029 | -25.2287661 | 5.3883148  |
| N  | -1.4439838 | -25.2530191 | 5.1585408  |
| C  | -3.4278346 | -24.6535855 | 6.5077756  |
| C  | -2.8084579 | -23.9497355 | 7.5510983  |
| C  | -3.5060804 | -23.2452813 | 8.6081915  |
| C  | -2.5462262 | -22.6020597 | 9.3576808  |
| C  | -1.2652358 | -22.9412848 | 8.7699483  |
| N  | -1.4440392 | -23.7595899 | 7.6831916  |
| C  | 0.0000000  | -22.4868630 | 9.2576598  |
| C  | 1.2652358  | -22.9412848 | 8.7699483  |
| C  | 2.5462262  | -22.6020597 | 9.3576808  |
| C  | 3.5060804  | -23.2452813 | 8.6081915  |
| C  | 2.8084579  | -23.9497355 | 7.5510983  |
| N  | 1.4440392  | -23.7595899 | 7.6831916  |
| C  | 3.4278346  | -24.6535855 | 6.5077756  |
| H  | 2.6817741  | -26.6108439 | 2.3468006  |
| H  | 4.5934882  | -25.9278987 | 4.1813289  |
| H  | -2.6817741 | -26.6108439 | 2.3468006  |
| H  | -4.5934882 | -25.9278987 | 4.1813289  |
| H  | -4.5936110 | -23.2334068 | 8.7478214  |
| H  | -2.6820684 | -21.9618299 | 10.2360089 |
| H  | 2.6820684  | -21.9618299 | 10.2360089 |
| H  | 4.5936110  | -23.2334068 | 8.7478214  |
| Zn | 0.0000000  | 24.5095657  | 6.4229608  |
| H  | 4.5260246  | 24.7088240  | 6.5404045  |
| H  | -4.5260246 | 24.7088240  | 6.5404045  |
| C  | 2.5462262  | 22.6020597  | 9.3576808  |
| C  | 3.5060804  | 23.2452813  | 8.6081915  |
| C  | 2.8084579  | 23.9497355  | 7.5510983  |
| C  | 1.2652358  | 22.9412848  | 8.7699483  |
| N  | 1.4440392  | 23.7595899  | 7.6831916  |
| C  | 0.0000000  | 22.4868630  | 9.2576598  |
| C  | -1.2652358 | 22.9412848  | 8.7699483  |
| C  | -2.5462262 | 22.6020597  | 9.3576808  |
| C  | -3.5060804 | 23.2452813  | 8.6081915  |
| C  | -2.8084579 | 23.9497355  | 7.5510983  |
| N  | -1.4440392 | 23.7595899  | 7.6831916  |
| C  | -3.4278346 | 24.6535855  | 6.5077756  |
| C  | -2.8084029 | 25.2287661  | 5.3883148  |
| C  | -3.5059569 | 25.8116031  | 4.2595717  |
| C  | -2.5460698 | 26.1542247  | 3.3331860  |

|    |            |             |             |
|----|------------|-------------|-------------|
| C  | -1.2651989 | 25.8051651  | 3.9152128   |
| N  | -1.4439838 | 25.2530191  | 5.1585408   |
| C  | 0.0000000  | 26.0071420  | 3.2798746   |
| C  | 1.2651989  | 25.8051651  | 3.9152128   |
| C  | 2.5460698  | 26.1542247  | 3.3331860   |
| C  | 3.5059569  | 25.8116031  | 4.2595717   |
| C  | 2.8084029  | 25.2287661  | 5.3883148   |
| N  | 1.4439838  | 25.2530191  | 5.1585408   |
| C  | 3.4278346  | 24.6535855  | 6.5077756   |
| H  | 2.6820684  | 21.9618299  | 10.2360089  |
| H  | 4.5936110  | 23.2334068  | 8.7478214   |
| H  | -2.6820684 | 21.9618299  | 10.2360089  |
| H  | -4.5936110 | 23.2334068  | 8.7478214   |
| H  | -4.5934882 | 25.9278987  | 4.1813289   |
| H  | -2.6817741 | 26.6108439  | 2.3468006   |
| H  | 2.6817741  | 26.6108439  | 2.3468006   |
| H  | 4.5934882  | 25.9278987  | 4.1813289   |
| Zn | 0.0000000  | -24.5095657 | -6.4229608  |
| H  | 4.5260246  | -24.7088240 | -6.5404045  |
| H  | -4.5260246 | -24.7088240 | -6.5404045  |
| C  | 2.5462262  | -22.6020597 | -9.3576808  |
| C  | 3.5060804  | -23.2452813 | -8.6081915  |
| C  | 2.8084579  | -23.9497355 | -7.5510983  |
| C  | 1.2652358  | -22.9412848 | -8.7699483  |
| N  | 1.4440392  | -23.7595899 | -7.6831916  |
| C  | 0.0000000  | -22.4868630 | -9.2576598  |
| C  | -1.2652358 | -22.9412848 | -8.7699483  |
| C  | -2.5462262 | -22.6020597 | -9.3576808  |
| C  | -3.5060804 | -23.2452813 | -8.6081915  |
| C  | -2.8084579 | -23.9497355 | -7.5510983  |
| N  | -1.4440392 | -23.7595899 | -7.6831916  |
| C  | -3.4278346 | -24.6535855 | -6.5077756  |
| C  | -2.8084029 | -25.2287661 | -5.3883148  |
| C  | -3.5059569 | -25.8116031 | -4.2595717  |
| C  | -2.5460698 | -26.1542247 | -3.3331860  |
| C  | -1.2651989 | -25.8051651 | -3.9152128  |
| N  | -1.4439838 | -25.2530191 | -5.1585408  |
| C  | 0.0000000  | -26.0071420 | -3.2798746  |
| C  | 1.2651989  | -25.8051651 | -3.9152128  |
| C  | 2.5460698  | -26.1542247 | -3.3331860  |
| C  | 3.5059569  | -25.8116031 | -4.2595717  |
| C  | 2.8084029  | -25.2287661 | -5.3883148  |
| N  | 1.4439838  | -25.2530191 | -5.1585408  |
| C  | 3.4278346  | -24.6535855 | -6.5077756  |
| H  | 2.6820684  | -21.9618299 | -10.2360089 |
| H  | 4.5936110  | -23.2334068 | -8.7478214  |
| H  | -2.6820684 | -21.9618299 | -10.2360089 |
| H  | -4.5936110 | -23.2334068 | -8.7478214  |
| H  | -4.5934882 | -25.9278987 | -4.1813289  |

|    |            |             |             |
|----|------------|-------------|-------------|
| H  | -2.6817741 | -26.6108439 | -2.3468006  |
| H  | 2.6817741  | -26.6108439 | -2.3468006  |
| H  | 4.5934882  | -25.9278987 | -4.1813289  |
| Zn | 0.0000000  | 24.5095657  | -6.4229608  |
| H  | 4.5260246  | 24.7088240  | -6.5404045  |
| H  | -4.5260246 | 24.7088240  | -6.5404045  |
| C  | 2.5460698  | 26.1542247  | -3.3331860  |
| C  | 3.5059569  | 25.8116031  | -4.2595717  |
| C  | 2.8084029  | 25.2287661  | -5.3883148  |
| C  | 1.2651989  | 25.8051651  | -3.9152128  |
| N  | 1.4439838  | 25.2530191  | -5.1585408  |
| C  | 0.0000000  | 26.0071420  | -3.2798746  |
| C  | -1.2651989 | 25.8051651  | -3.9152128  |
| C  | -2.5460698 | 26.1542247  | -3.3331860  |
| C  | -3.5059569 | 25.8116031  | -4.2595717  |
| C  | -2.8084029 | 25.2287661  | -5.3883148  |
| N  | -1.4439838 | 25.2530191  | -5.1585408  |
| C  | -3.4278346 | 24.6535855  | -6.5077756  |
| C  | -2.8084579 | 23.9497355  | -7.5510983  |
| C  | -3.5060804 | 23.2452813  | -8.6081915  |
| C  | -2.5462262 | 22.6020597  | -9.3576808  |
| C  | -1.2652358 | 22.9412848  | -8.7699483  |
| N  | -1.4440392 | 23.7595899  | -7.6831916  |
| C  | 0.0000000  | 22.4868630  | -9.2576598  |
| C  | 1.2652358  | 22.9412848  | -8.7699483  |
| C  | 2.5462262  | 22.6020597  | -9.3576808  |
| C  | 3.5060804  | 23.2452813  | -8.6081915  |
| C  | 2.8084579  | 23.9497355  | -7.5510983  |
| N  | 1.4440392  | 23.7595899  | -7.6831916  |
| C  | 3.4278346  | 24.6535855  | -6.5077756  |
| H  | 2.6817741  | 26.6108439  | -2.3468006  |
| H  | 4.5934882  | 25.9278987  | -4.1813289  |
| H  | -2.6817741 | 26.6108439  | -2.3468006  |
| H  | -4.5934882 | 25.9278987  | -4.1813289  |
| H  | -4.5936110 | 23.2334068  | -8.7478214  |
| H  | -2.6820684 | 21.9618299  | -10.2360089 |
| H  | 2.6820684  | 21.9618299  | -10.2360089 |
| H  | 4.5936110  | 23.2334068  | -8.7478214  |
| C  | 0.0000000  | -4.8698930  | 14.1220381  |
| C  | 0.0000000  | -6.1098311  | 14.2207048  |
| C  | 0.0000000  | -7.4595663  | 14.2838279  |
| C  | 0.0000000  | -8.7036569  | 14.2949012  |
| C  | -4.7577692 | 0.0000000   | 12.8393072  |
| C  | -5.8466161 | 0.0000000   | 12.2356106  |
| C  | -6.9514215 | 0.0000000   | 11.4576284  |
| C  | -7.8817021 | 0.0000000   | 10.6301155  |
| C  | 0.0000000  | 4.8698930   | 14.1220381  |
| C  | 0.0000000  | 6.1098311   | 14.2207048  |
| C  | 0.0000000  | 7.4595663   | 14.2838279  |

|   |             |             |             |
|---|-------------|-------------|-------------|
| C | 0.0000000   | 8.7036569   | 14.2949012  |
| C | 4.7577692   | 0.0000000   | 12.8393072  |
| C | 5.8466161   | 0.0000000   | 12.2356106  |
| C | 6.9514215   | 0.0000000   | 11.4576284  |
| C | 7.8817021   | 0.0000000   | 10.6301155  |
| C | 12.0848546  | 0.0000000   | 1.9156999   |
| C | 12.1937921  | 0.0000000   | 0.6756921   |
| C | 12.1937921  | 0.0000000   | -0.6756921  |
| C | 12.0848546  | 0.0000000   | -1.9156999  |
| C | -12.0848546 | 0.0000000   | 1.9156999   |
| C | -12.1937921 | 0.0000000   | 0.6756921   |
| C | -12.1937921 | 0.0000000   | -0.6756921  |
| C | -12.0848546 | 0.0000000   | -1.9156999  |
| C | 0.0000000   | 4.8698930   | -14.1220381 |
| C | 0.0000000   | 6.1098311   | -14.2207048 |
| C | 0.0000000   | 7.4595663   | -14.2838279 |
| C | 0.0000000   | 8.7036569   | -14.2949012 |
| C | -4.7577692  | 0.0000000   | -12.8393072 |
| C | -5.8466161  | 0.0000000   | -12.2356106 |
| C | -6.9514215  | 0.0000000   | -11.4576284 |
| C | -7.8817021  | 0.0000000   | -10.6301155 |
| C | 0.0000000   | -4.8698930  | -14.1220381 |
| C | 0.0000000   | -6.1098311  | -14.2207048 |
| C | 0.0000000   | -7.4595663  | -14.2838279 |
| C | 0.0000000   | -8.7036569  | -14.2949012 |
| C | 4.7577692   | 0.0000000   | -12.8393072 |
| C | 5.8466161   | 0.0000000   | -12.2356106 |
| C | 6.9514215   | 0.0000000   | -11.4576284 |
| C | 7.8817021   | 0.0000000   | -10.6301155 |
| C | 0.0000000   | -18.2516650 | 12.3094722  |
| C | 0.0000000   | -19.3531525 | 11.7300736  |
| C | 0.0000000   | -20.4917023 | 11.0024080  |
| C | 0.0000000   | -21.4778853 | 10.2429686  |
| C | 0.0000000   | 18.2516650  | 12.3094722  |
| C | 0.0000000   | 19.3531525  | 11.7300736  |
| C | 0.0000000   | 20.4917023  | 11.0024080  |
| C | 0.0000000   | 21.4778853  | 10.2429686  |
| C | 0.0000000   | -18.2516650 | -12.3094722 |
| C | 0.0000000   | -19.3531525 | -11.7300736 |
| C | 0.0000000   | -20.4917023 | -11.0024080 |
| C | 0.0000000   | -21.4778853 | -10.2429686 |
| C | 0.0000000   | 18.2516650  | -12.3094722 |
| C | 0.0000000   | 19.3531525  | -11.7300736 |
| C | 0.0000000   | 20.4917023  | -11.0024080 |
| C | 0.0000000   | 21.4778853  | -10.2429686 |
| C | 0.0000000   | -26.3543467 | 1.9130136   |
| C | 0.0000000   | -26.4911860 | 0.6755646   |
| C | 0.0000000   | -26.4911860 | -0.6755646  |
| C | 0.0000000   | -26.3543467 | -1.9130136  |



|   |           |            |            |
|---|-----------|------------|------------|
| C | 0.0000000 | 26.3543467 | 1.9130136  |
| C | 0.0000000 | 26.4911860 | 0.6755646  |
| C | 0.0000000 | 26.4911860 | -0.6755646 |
| C | 0.0000000 | 26.3543467 | -1.9130136 |

Molecule 4)

550

Energy =

|    |            |             |            |
|----|------------|-------------|------------|
| Zn | 0.0000000  | -0.0000000  | 16.4217156 |
| C  | -0.6884634 | -4.2784288  | 16.3308118 |
| C  | 0.6884634  | -4.2784288  | 16.3308118 |
| C  | 1.1020721  | -2.8937283  | 16.3731942 |
| C  | -1.1020721 | -2.8937283  | 16.3731942 |
| N  | 0.0000000  | -2.0664911  | 16.4135191 |
| C  | -2.4612961 | -2.4612961  | 16.3264672 |
| C  | -2.8937283 | -1.1020721  | 16.3731942 |
| C  | -4.2784288 | -0.6884634  | 16.3308118 |
| C  | -4.2784288 | 0.6884634   | 16.3308118 |
| C  | -2.8937283 | 1.1020721   | 16.3731942 |
| N  | -2.0664911 | 0.0000000   | 16.4135191 |
| C  | -2.4612961 | 2.4612961   | 16.3264672 |
| C  | -1.1020721 | 2.8937283   | 16.3731942 |
| C  | -0.6884634 | 4.2784288   | 16.3308118 |
| C  | 0.6884634  | 4.2784288   | 16.3308118 |
| C  | 1.1020721  | 2.8937283   | 16.3731942 |
| N  | 0.0000000  | 2.0664911   | 16.4135191 |
| C  | 2.4612961  | 2.4612961   | 16.3264672 |
| C  | 2.8937283  | 1.1020721   | 16.3731942 |
| C  | 4.2784288  | 0.6884634   | 16.3308118 |
| C  | 4.2784288  | -0.6884634  | 16.3308118 |
| C  | 2.8937283  | -1.1020721  | 16.3731942 |
| N  | 2.0664911  | 0.0000000   | 16.4135191 |
| C  | 2.4612961  | -2.4612961  | 16.3264672 |
| H  | -1.3690977 | -5.1356912  | 16.3005527 |
| H  | 1.3690977  | -5.1356912  | 16.3005527 |
| H  | -5.1356912 | -1.3690977  | 16.3005527 |
| H  | -5.1356912 | 1.3690977   | 16.3005527 |
| H  | -1.3690977 | 5.1356912   | 16.3005527 |
| H  | 1.3690977  | 5.1356912   | 16.3005527 |
| H  | 5.1356912  | 1.3690977   | 16.3005527 |
| H  | 5.1356912  | -1.3690977  | 16.3005527 |
| Zn | 12.5940908 | -12.5940908 | 0.0000000  |
| C  | 10.7053193 | -14.3067144 | 3.5007313  |
| C  | 10.1292642 | -15.0894580 | 2.5251668  |
| C  | 10.6637600 | -14.6367599 | 1.2564844  |
| C  | 11.6071948 | -13.3963002 | 2.8229648  |
| N  | 11.5714295 | -13.6138105 | 1.4683947  |
| C  | 12.4153559 | -12.4153559 | 3.4781166  |
| C  | 13.3963002 | -11.6071948 | 2.8229648  |

|    |             |             |            |
|----|-------------|-------------|------------|
| C  | 14.3067144  | -10.7053193 | 3.5007313  |
| C  | 15.0894580  | -10.1292642 | 2.5251668  |
| C  | 14.6367599  | -10.6637600 | 1.2564844  |
| N  | 13.6138105  | -11.5714295 | 1.4683947  |
| C  | 15.1196020  | -10.2700158 | 0.0000000  |
| C  | 14.6367599  | -10.6637600 | -1.2564844 |
| C  | 15.0894580  | -10.1292642 | -2.5251668 |
| C  | 14.3067144  | -10.7053193 | -3.5007313 |
| C  | 13.3963002  | -11.6071948 | -2.8229648 |
| N  | 13.6138105  | -11.5714295 | -1.4683947 |
| C  | 12.4153559  | -12.4153559 | -3.4781166 |
| C  | 11.6071948  | -13.3963002 | -2.8229648 |
| C  | 10.7053193  | -14.3067144 | -3.5007313 |
| C  | 10.1292642  | -15.0894580 | -2.5251668 |
| C  | 10.6637600  | -14.6367599 | -1.2564844 |
| N  | 11.5714295  | -13.6138105 | -1.4683947 |
| C  | 10.2700158  | -15.1196020 | 0.0000000  |
| H  | 10.5469382  | -14.3398593 | 4.5840464  |
| H  | 9.3962181   | -15.8953760 | 2.6495927  |
| H  | 14.3398593  | -10.5469382 | 4.5840464  |
| H  | 15.8953760  | -9.3962181  | 2.6495927  |
| H  | 15.8953760  | -9.3962181  | -2.6495927 |
| H  | 14.3398593  | -10.5469382 | -4.5840464 |
| H  | 10.5469382  | -14.3398593 | -4.5840464 |
| H  | 9.3962181   | -15.8953760 | -2.6495927 |
| Zn | -12.5940908 | 12.5940908  | 0.0000000  |
| C  | -10.7053193 | 14.3067144  | 3.5007313  |
| C  | -10.1292642 | 15.0894580  | 2.5251668  |
| C  | -10.6637600 | 14.6367599  | 1.2564844  |
| C  | -11.6071948 | 13.3963002  | 2.8229648  |
| N  | -11.5714295 | 13.6138105  | 1.4683947  |
| C  | -12.4153559 | 12.4153559  | 3.4781166  |
| C  | -13.3963002 | 11.6071948  | 2.8229648  |
| C  | -14.3067144 | 10.7053193  | 3.5007313  |
| C  | -15.0894580 | 10.1292642  | 2.5251668  |
| C  | -14.6367599 | 10.6637600  | 1.2564844  |
| N  | -13.6138105 | 11.5714295  | 1.4683947  |
| C  | -15.1196020 | 10.2700158  | 0.0000000  |
| C  | -14.6367599 | 10.6637600  | -1.2564844 |
| C  | -15.0894580 | 10.1292642  | -2.5251668 |
| C  | -14.3067144 | 10.7053193  | -3.5007313 |
| C  | -13.3963002 | 11.6071948  | -2.8229648 |
| N  | -13.6138105 | 11.5714295  | -1.4683947 |
| C  | -12.4153559 | 12.4153559  | -3.4781166 |
| C  | -11.6071948 | 13.3963002  | -2.8229648 |
| C  | -10.7053193 | 14.3067144  | -3.5007313 |
| C  | -10.1292642 | 15.0894580  | -2.5251668 |
| C  | -10.6637600 | 14.6367599  | -1.2564844 |
| N  | -11.5714295 | 13.6138105  | -1.4683947 |

|    |             |             |             |
|----|-------------|-------------|-------------|
| C  | -10.2700158 | 15.1196020  | 0.0000000   |
| H  | -10.5469382 | 14.3398593  | 4.5840464   |
| H  | -9.3962181  | 15.8953760  | 2.6495927   |
| H  | -14.3398593 | 10.5469382  | 4.5840464   |
| H  | -15.8953760 | 9.3962181   | 2.6495927   |
| H  | -15.8953760 | 9.3962181   | -2.6495927  |
| H  | -14.3398593 | 10.5469382  | -4.5840464  |
| H  | -10.5469382 | 14.3398593  | -4.5840464  |
| H  | -9.3962181  | 15.8953760  | -2.6495927  |
| Zn | 0.0000000   | 0.0000000   | -16.4217156 |
| C  | 4.2784288   | 0.6884634   | -16.3308118 |
| C  | 4.2784288   | -0.6884634  | -16.3308118 |
| C  | 2.8937283   | -1.1020721  | -16.3731942 |
| C  | 2.8937283   | 1.1020721   | -16.3731942 |
| N  | 2.0664911   | 0.0000000   | -16.4135191 |
| C  | 2.4612961   | 2.4612961   | -16.3264672 |
| C  | 1.1020721   | 2.8937283   | -16.3731942 |
| C  | 0.6884634   | 4.2784288   | -16.3308118 |
| C  | -0.6884634  | 4.2784288   | -16.3308118 |
| C  | -1.1020721  | 2.8937283   | -16.3731942 |
| N  | 0.0000000   | 2.0664911   | -16.4135191 |
| C  | -2.4612961  | 2.4612961   | -16.3264672 |
| C  | -2.8937283  | 1.1020721   | -16.3731942 |
| C  | -4.2784288  | 0.6884634   | -16.3308118 |
| C  | -4.2784288  | -0.6884634  | -16.3308118 |
| C  | -2.8937283  | -1.1020721  | -16.3731942 |
| N  | -2.0664911  | 0.0000000   | -16.4135191 |
| C  | -2.4612961  | -2.4612961  | -16.3264672 |
| C  | -1.1020721  | -2.8937283  | -16.3731942 |
| C  | -0.6884634  | -4.2784288  | -16.3308118 |
| C  | 0.6884634   | -4.2784288  | -16.3308118 |
| C  | 1.1020721   | -2.8937283  | -16.3731942 |
| N  | 0.0000000   | -2.0664911  | -16.4135191 |
| C  | 2.4612961   | -2.4612961  | -16.3264672 |
| H  | 5.1356912   | 1.3690977   | -16.3005527 |
| H  | 5.1356912   | -1.3690977  | -16.3005527 |
| H  | 1.3690977   | 5.1356912   | -16.3005527 |
| H  | -1.3690977  | 5.1356912   | -16.3005527 |
| H  | -5.1356912  | 1.3690977   | -16.3005527 |
| H  | -5.1356912  | -1.3690977  | -16.3005527 |
| H  | -1.3690977  | -5.1356912  | -16.3005527 |
| H  | 1.3690977   | -5.1356912  | -16.3005527 |
| Zn | 8.8209240   | -8.8209240  | 12.0379516  |
| C  | 7.6724780   | -12.6326697 | 10.3554438  |
| C  | 8.7936881   | -12.3950035 | 9.5920555   |
| C  | 9.3423039   | -11.1313992 | 10.0433777  |
| C  | 7.5294922   | -11.5023823 | 11.2510124  |
| N  | 8.5672622   | -10.6096752 | 11.0487527  |
| C  | 6.4630918   | -11.3128240 | 12.1423057  |

|    |             |             |            |
|----|-------------|-------------|------------|
| C  | 6.2142380   | -10.1876090 | 12.9411387 |
| C  | 5.0294960   | -9.9900310  | 13.7522277 |
| C  | 5.1296990   | -8.7314560  | 14.3016380 |
| C  | 6.3879114   | -8.1771550  | 13.8413723 |
| N  | 7.0304366   | -9.0729215  | 13.0241868 |
| C  | 6.8825617   | -6.8825617  | 14.1931750 |
| C  | 8.1771550   | -6.3879114  | 13.8413723 |
| C  | 8.7314560   | -5.1296990  | 14.3016380 |
| C  | 9.9900310   | -5.0294960  | 13.7522277 |
| C  | 10.1876090  | -6.2142380  | 12.9411387 |
| N  | 9.0729215   | -7.0304366  | 13.0241868 |
| C  | 11.3128240  | -6.4630918  | 12.1423057 |
| C  | 11.5023823  | -7.5294922  | 11.2510124 |
| C  | 12.6326697  | -7.6724780  | 10.3554438 |
| C  | 12.3950035  | -8.7936881  | 9.5920555  |
| C  | 11.1313992  | -9.3423039  | 10.0433777 |
| N  | 10.6096752  | -8.5672622  | 11.0487527 |
| C  | 10.5221400  | -10.5221400 | 9.5129551  |
| H  | 6.9923323   | -13.4915230 | 10.3096379 |
| H  | 9.2231656   | -13.0159824 | 8.7985436  |
| H  | 4.2190454   | -10.7185879 | 13.8734746 |
| H  | 4.4253748   | -8.2187196  | 14.9655471 |
| H  | 8.2187196   | -4.4253748  | 14.9655471 |
| H  | 10.7185879  | -4.2190454  | 13.8734746 |
| H  | 13.4915230  | -6.9923323  | 10.3096379 |
| H  | 13.0159824  | -9.2231656  | 8.7985436  |
| Zn | -8.8209240  | 8.8209240   | 12.0379516 |
| C  | -5.1296990  | 8.7314560   | 14.3016380 |
| C  | -5.0294960  | 9.9900310   | 13.7522277 |
| C  | -6.2142380  | 10.1876090  | 12.9411387 |
| C  | -6.3879114  | 8.1771550   | 13.8413723 |
| N  | -7.0304366  | 9.0729215   | 13.0241868 |
| C  | -6.8825617  | 6.8825617   | 14.1931750 |
| C  | -8.1771550  | 6.3879114   | 13.8413723 |
| C  | -8.7314560  | 5.1296990   | 14.3016380 |
| C  | -9.9900310  | 5.0294960   | 13.7522277 |
| C  | -10.1876090 | 6.2142380   | 12.9411387 |
| N  | -9.0729215  | 7.0304366   | 13.0241868 |
| C  | -11.3128240 | 6.4630918   | 12.1423057 |
| C  | -11.5023823 | 7.5294922   | 11.2510124 |
| C  | -12.6326697 | 7.6724780   | 10.3554438 |
| C  | -12.3950035 | 8.7936881   | 9.5920555  |
| C  | -11.1313992 | 9.3423039   | 10.0433777 |
| N  | -10.6096752 | 8.5672622   | 11.0487527 |
| C  | -10.5221400 | 10.5221400  | 9.5129551  |
| C  | -9.3423039  | 11.1313992  | 10.0433777 |
| C  | -8.7936881  | 12.3950035  | 9.5920555  |
| C  | -7.6724780  | 12.6326697  | 10.3554438 |
| C  | -7.5294922  | 11.5023823  | 11.2510124 |

|    |             |             |             |
|----|-------------|-------------|-------------|
| N  | -8.5672622  | 10.6096752  | 11.0487527  |
| C  | -6.4630918  | 11.3128240  | 12.1423057  |
| H  | -4.4253748  | 8.2187196   | 14.9655471  |
| H  | -4.2190454  | 10.7185879  | 13.8734746  |
| H  | -8.2187196  | 4.4253748   | 14.9655471  |
| H  | -10.7185879 | 4.2190454   | 13.8734746  |
| H  | -13.4915230 | 6.9923323   | 10.3096379  |
| H  | -13.0159824 | 9.2231656   | 8.7985436   |
| H  | -9.2231656  | 13.0159824  | 8.7985436   |
| H  | -6.9923323  | 13.4915230  | 10.3096379  |
| Zn | -8.8209240  | 8.8209240   | -12.0379516 |
| C  | -5.0294960  | 9.9900310   | -13.7522277 |
| C  | -5.1296990  | 8.7314560   | -14.3016380 |
| C  | -6.3879114  | 8.1771550   | -13.8413723 |
| C  | -6.2142380  | 10.1876090  | -12.9411387 |
| N  | -7.0304366  | 9.0729215   | -13.0241868 |
| C  | -6.4630918  | 11.3128240  | -12.1423057 |
| C  | -7.5294922  | 11.5023823  | -11.2510124 |
| C  | -7.6724780  | 12.6326697  | -10.3554438 |
| C  | -8.7936881  | 12.3950035  | -9.5920555  |
| C  | -9.3423039  | 11.1313992  | -10.0433777 |
| N  | -8.5672622  | 10.6096752  | -11.0487527 |
| C  | -10.5221400 | 10.5221400  | -9.5129551  |
| C  | -11.1313992 | 9.3423039   | -10.0433777 |
| C  | -12.3950035 | 8.7936881   | -9.5920555  |
| C  | -12.6326697 | 7.6724780   | -10.3554438 |
| C  | -11.5023823 | 7.5294922   | -11.2510124 |
| N  | -10.6096752 | 8.5672622   | -11.0487527 |
| C  | -11.3128240 | 6.4630918   | -12.1423057 |
| C  | -10.1876090 | 6.2142380   | -12.9411387 |
| C  | -9.9900310  | 5.0294960   | -13.7522277 |
| C  | -8.7314560  | 5.1296990   | -14.3016380 |
| C  | -8.1771550  | 6.3879114   | -13.8413723 |
| N  | -9.0729215  | 7.0304366   | -13.0241868 |
| C  | -6.8825617  | 6.8825617   | -14.1931750 |
| H  | -4.2190454  | 10.7185879  | -13.8734746 |
| H  | -4.4253748  | 8.2187196   | -14.9655471 |
| H  | -6.9923323  | 13.4915230  | -10.3096379 |
| H  | -9.2231656  | 13.0159824  | -8.7985436  |
| H  | -13.0159824 | 9.2231656   | -8.7985436  |
| H  | -13.4915230 | 6.9923323   | -10.3096379 |
| H  | -10.7185879 | 4.2190454   | -13.8734746 |
| H  | -8.2187196  | 4.4253748   | -14.9655471 |
| Zn | 8.8209240   | -8.8209240  | -12.0379516 |
| C  | 8.7936881   | -12.3950035 | -9.5920555  |
| C  | 7.6724780   | -12.6326697 | -10.3554438 |
| C  | 7.5294922   | -11.5023823 | -11.2510124 |
| C  | 9.3423039   | -11.1313992 | -10.0433777 |
| N  | 8.5672622   | -10.6096752 | -11.0487527 |

|    |            |             |             |
|----|------------|-------------|-------------|
| C  | 10.5221400 | -10.5221400 | -9.5129551  |
| C  | 11.1313992 | -9.3423039  | -10.0433777 |
| C  | 12.3950035 | -8.7936881  | -9.5920555  |
| C  | 12.6326697 | -7.6724780  | -10.3554438 |
| C  | 11.5023823 | -7.5294922  | -11.2510124 |
| N  | 10.6096752 | -8.5672622  | -11.0487527 |
| C  | 11.3128240 | -6.4630918  | -12.1423057 |
| C  | 10.1876090 | -6.2142380  | -12.9411387 |
| C  | 9.9900310  | -5.0294960  | -13.7522277 |
| C  | 8.7314560  | -5.1296990  | -14.3016380 |
| C  | 8.1771550  | -6.3879114  | -13.8413723 |
| N  | 9.0729215  | -7.0304366  | -13.0241868 |
| C  | 6.8825617  | -6.8825617  | -14.1931750 |
| C  | 6.3879114  | -8.1771550  | -13.8413723 |
| C  | 5.1296990  | -8.7314560  | -14.3016380 |
| C  | 5.0294960  | -9.9900310  | -13.7522277 |
| C  | 6.2142380  | -10.1876090 | -12.9411387 |
| N  | 7.0304366  | -9.0729215  | -13.0241868 |
| C  | 6.4630918  | -11.3128240 | -12.1423057 |
| H  | 9.2231656  | -13.0159824 | -8.7985436  |
| H  | 6.9923323  | -13.4915230 | -10.3096379 |
| H  | 13.0159824 | -9.2231656  | -8.7985436  |
| H  | 13.4915230 | -6.9923323  | -10.3096379 |
| H  | 10.7185879 | -4.2190454  | -13.8734746 |
| H  | 8.2187196  | -4.4253748  | -14.9655471 |
| H  | 4.4253748  | -8.2187196  | -14.9655471 |
| H  | 4.2190454  | -10.7185879 | -13.8734746 |
| Zn | 12.5940908 | 12.5940908  | 0.0000000   |
| C  | 14.3067144 | 10.7053193  | 3.5007313   |
| C  | 15.0894580 | 10.1292642  | 2.5251668   |
| C  | 14.6367599 | 10.6637600  | 1.2564844   |
| C  | 13.3963002 | 11.6071948  | 2.8229648   |
| N  | 13.6138105 | 11.5714295  | 1.4683947   |
| C  | 12.4153559 | 12.4153559  | 3.4781166   |
| C  | 11.6071948 | 13.3963002  | 2.8229648   |
| C  | 10.7053193 | 14.3067144  | 3.5007313   |
| C  | 10.1292642 | 15.0894580  | 2.5251668   |
| C  | 10.6637600 | 14.6367599  | 1.2564844   |
| N  | 11.5714295 | 13.6138105  | 1.4683947   |
| C  | 10.2700158 | 15.1196020  | 0.0000000   |
| C  | 10.6637600 | 14.6367599  | -1.2564844  |
| C  | 10.1292642 | 15.0894580  | -2.5251668  |
| C  | 10.7053193 | 14.3067144  | -3.5007313  |
| C  | 11.6071948 | 13.3963002  | -2.8229648  |
| N  | 11.5714295 | 13.6138105  | -1.4683947  |
| C  | 12.4153559 | 12.4153559  | -3.4781166  |
| C  | 13.3963002 | 11.6071948  | -2.8229648  |
| C  | 14.3067144 | 10.7053193  | -3.5007313  |
| C  | 15.0894580 | 10.1292642  | -2.5251668  |

|    |             |             |            |
|----|-------------|-------------|------------|
| C  | 14.6367599  | 10.6637600  | -1.2564844 |
| N  | 13.6138105  | 11.5714295  | -1.4683947 |
| C  | 15.1196020  | 10.2700158  | 0.0000000  |
| H  | 14.3398593  | 10.5469382  | 4.5840464  |
| H  | 15.8953760  | 9.3962181   | 2.6495927  |
| H  | 10.5469382  | 14.3398593  | 4.5840464  |
| H  | 9.3962181   | 15.8953760  | 2.6495927  |
| H  | 9.3962181   | 15.8953760  | -2.6495927 |
| H  | 10.5469382  | 14.3398593  | -4.5840464 |
| H  | 14.3398593  | 10.5469382  | -4.5840464 |
| H  | 15.8953760  | 9.3962181   | -2.6495927 |
| Zn | -12.5940908 | -12.5940908 | 0.0000000  |
| C  | -14.3067144 | -10.7053193 | -3.5007313 |
| C  | -15.0894580 | -10.1292642 | -2.5251668 |
| C  | -14.6367599 | -10.6637600 | -1.2564844 |
| C  | -13.3963002 | -11.6071948 | -2.8229648 |
| N  | -13.6138105 | -11.5714295 | -1.4683947 |
| C  | -12.4153559 | -12.4153559 | -3.4781166 |
| C  | -11.6071948 | -13.3963002 | -2.8229648 |
| C  | -10.7053193 | -14.3067144 | -3.5007313 |
| C  | -10.1292642 | -15.0894580 | -2.5251668 |
| C  | -10.6637600 | -14.6367599 | -1.2564844 |
| N  | -11.5714295 | -13.6138105 | -1.4683947 |
| C  | -10.2700158 | -15.1196020 | 0.0000000  |
| C  | -10.6637600 | -14.6367599 | 1.2564844  |
| C  | -10.1292642 | -15.0894580 | 2.5251668  |
| C  | -10.7053193 | -14.3067144 | 3.5007313  |
| C  | -11.6071948 | -13.3963002 | 2.8229648  |
| N  | -11.5714295 | -13.6138105 | 1.4683947  |
| C  | -12.4153559 | -12.4153559 | 3.4781166  |
| C  | -13.3963002 | -11.6071948 | 2.8229648  |
| C  | -14.3067144 | -10.7053193 | 3.5007313  |
| C  | -15.0894580 | -10.1292642 | 2.5251668  |
| C  | -14.6367599 | -10.6637600 | 1.2564844  |
| N  | -13.6138105 | -11.5714295 | 1.4683947  |
| C  | -15.1196020 | -10.2700158 | 0.0000000  |
| H  | -14.3398593 | -10.5469382 | -4.5840464 |
| H  | -15.8953760 | -9.3962181  | -2.6495927 |
| H  | -10.5469382 | -14.3398593 | -4.5840464 |
| H  | -9.3962181  | -15.8953760 | -2.6495927 |
| H  | -9.3962181  | -15.8953760 | 2.6495927  |
| H  | -10.5469382 | -14.3398593 | 4.5840464  |
| H  | -14.3398593 | -10.5469382 | 4.5840464  |
| H  | -15.8953760 | -9.3962181  | 2.6495927  |
| Zn | 8.8209240   | 8.8209240   | 12.0379516 |
| C  | 12.6326697  | 7.6724780   | 10.3554438 |
| C  | 12.3950035  | 8.7936881   | 9.5920555  |
| C  | 11.1313992  | 9.3423039   | 10.0433777 |
| C  | 11.5023823  | 7.5294922   | 11.2510124 |

|    |             |             |            |
|----|-------------|-------------|------------|
| N  | 10.6096752  | 8.5672622   | 11.0487527 |
| C  | 11.3128240  | 6.4630918   | 12.1423057 |
| C  | 10.1876090  | 6.2142380   | 12.9411387 |
| C  | 9.9900310   | 5.0294960   | 13.7522277 |
| C  | 8.7314560   | 5.1296990   | 14.3016380 |
| C  | 8.1771550   | 6.3879114   | 13.8413723 |
| N  | 9.0729215   | 7.0304366   | 13.0241868 |
| C  | 6.8825617   | 6.8825617   | 14.1931750 |
| C  | 6.3879114   | 8.1771550   | 13.8413723 |
| C  | 5.1296990   | 8.7314560   | 14.3016380 |
| C  | 5.0294960   | 9.9900310   | 13.7522277 |
| C  | 6.2142380   | 10.1876090  | 12.9411387 |
| N  | 7.0304366   | 9.0729215   | 13.0241868 |
| C  | 6.4630918   | 11.3128240  | 12.1423057 |
| C  | 7.5294922   | 11.5023823  | 11.2510124 |
| C  | 7.6724780   | 12.6326697  | 10.3554438 |
| C  | 8.7936881   | 12.3950035  | 9.5920555  |
| C  | 9.3423039   | 11.1313992  | 10.0433777 |
| N  | 8.5672622   | 10.6096752  | 11.0487527 |
| C  | 10.5221400  | 10.5221400  | 9.5129551  |
| H  | 13.4915230  | 6.9923323   | 10.3096379 |
| H  | 13.0159824  | 9.2231656   | 8.7985436  |
| H  | 10.7185879  | 4.2190454   | 13.8734746 |
| H  | 8.2187196   | 4.4253748   | 14.9655471 |
| H  | 4.4253748   | 8.2187196   | 14.9655471 |
| H  | 4.2190454   | 10.7185879  | 13.8734746 |
| H  | 6.9923323   | 13.4915230  | 10.3096379 |
| H  | 9.2231656   | 13.0159824  | 8.7985436  |
| Zn | -8.8209240  | -8.8209240  | 12.0379516 |
| C  | -8.7936881  | -12.3950035 | 9.5920555  |
| C  | -7.6724780  | -12.6326697 | 10.3554438 |
| C  | -7.5294922  | -11.5023823 | 11.2510124 |
| C  | -9.3423039  | -11.1313992 | 10.0433777 |
| N  | -8.5672622  | -10.6096752 | 11.0487527 |
| C  | -10.5221400 | -10.5221400 | 9.5129551  |
| C  | -11.1313992 | -9.3423039  | 10.0433777 |
| C  | -12.3950035 | -8.7936881  | 9.5920555  |
| C  | -12.6326697 | -7.6724780  | 10.3554438 |
| C  | -11.5023823 | -7.5294922  | 11.2510124 |
| N  | -10.6096752 | -8.5672622  | 11.0487527 |
| C  | -11.3128240 | -6.4630918  | 12.1423057 |
| C  | -10.1876090 | -6.2142380  | 12.9411387 |
| C  | -9.9900310  | -5.0294960  | 13.7522277 |
| C  | -8.7314560  | -5.1296990  | 14.3016380 |
| C  | -8.1771550  | -6.3879114  | 13.8413723 |
| N  | -9.0729215  | -7.0304366  | 13.0241868 |
| C  | -6.8825617  | -6.8825617  | 14.1931750 |
| C  | -6.3879114  | -8.1771550  | 13.8413723 |
| C  | -5.1296990  | -8.7314560  | 14.3016380 |



|    |             |             |             |
|----|-------------|-------------|-------------|
| C  | -5.0294960  | -9.9900310  | 13.7522277  |
| C  | -6.2142380  | -10.1876090 | 12.9411387  |
| N  | -7.0304366  | -9.0729215  | 13.0241868  |
| C  | -6.4630918  | -11.3128240 | 12.1423057  |
| H  | -9.2231656  | -13.0159824 | 8.7985436   |
| H  | -6.9923323  | -13.4915230 | 10.3096379  |
| H  | -13.0159824 | -9.2231656  | 8.7985436   |
| H  | -13.4915230 | -6.9923323  | 10.3096379  |
| H  | -10.7185879 | -4.2190454  | 13.8734746  |
| H  | -8.2187196  | -4.4253748  | 14.9655471  |
| H  | -4.4253748  | -8.2187196  | 14.9655471  |
| H  | -4.2190454  | -10.7185879 | 13.8734746  |
| Zn | -8.8209240  | -8.8209240  | -12.0379516 |
| C  | -7.6724780  | -12.6326697 | -10.3554438 |
| C  | -8.7936881  | -12.3950035 | -9.5920555  |
| C  | -9.3423039  | -11.1313992 | -10.0433777 |
| C  | -7.5294922  | -11.5023823 | -11.2510124 |
| N  | -8.5672622  | -10.6096752 | -11.0487527 |
| C  | -6.4630918  | -11.3128240 | -12.1423057 |
| C  | -6.2142380  | -10.1876090 | -12.9411387 |
| C  | -5.0294960  | -9.9900310  | -13.7522277 |
| C  | -5.1296990  | -8.7314560  | -14.3016380 |
| C  | -6.3879114  | -8.1771550  | -13.8413723 |
| N  | -7.0304366  | -9.0729215  | -13.0241868 |
| C  | -6.8825617  | -6.8825617  | -14.1931750 |
| C  | -8.1771550  | -6.3879114  | -13.8413723 |
| C  | -8.7314560  | -5.1296990  | -14.3016380 |
| C  | -9.9900310  | -5.0294960  | -13.7522277 |
| C  | -10.1876090 | -6.2142380  | -12.9411387 |
| N  | -9.0729215  | -7.0304366  | -13.0241868 |
| C  | -11.3128240 | -6.4630918  | -12.1423057 |
| C  | -11.5023823 | -7.5294922  | -11.2510124 |
| C  | -12.6326697 | -7.6724780  | -10.3554438 |
| C  | -12.3950035 | -8.7936881  | -9.5920555  |
| C  | -11.1313992 | -9.3423039  | -10.0433777 |
| N  | -10.6096752 | -8.5672622  | -11.0487527 |
| C  | -10.5221400 | -10.5221400 | -9.5129551  |
| H  | -6.9923323  | -13.4915230 | -10.3096379 |
| H  | -9.2231656  | -13.0159824 | -8.7985436  |
| H  | -4.2190454  | -10.7185879 | -13.8734746 |
| H  | -4.4253748  | -8.2187196  | -14.9655471 |
| H  | -8.2187196  | -4.4253748  | -14.9655471 |
| H  | -10.7185879 | -4.2190454  | -13.8734746 |
| H  | -13.4915230 | -6.9923323  | -10.3096379 |
| H  | -13.0159824 | -9.2231656  | -8.7985436  |
| Zn | 8.8209240   | 8.8209240   | -12.0379516 |
| C  | 9.9900310   | 5.0294960   | -13.7522277 |
| C  | 8.7314560   | 5.1296990   | -14.3016380 |
| C  | 8.1771550   | 6.3879114   | -13.8413723 |

|   |            |             |             |
|---|------------|-------------|-------------|
| C | 10.1876090 | 6.2142380   | -12.9411387 |
| N | 9.0729215  | 7.0304366   | -13.0241868 |
| C | 11.3128240 | 6.4630918   | -12.1423057 |
| C | 11.5023823 | 7.5294922   | -11.2510124 |
| C | 12.6326697 | 7.6724780   | -10.3554438 |
| C | 12.3950035 | 8.7936881   | -9.5920555  |
| C | 11.1313992 | 9.3423039   | -10.0433777 |
| N | 10.6096752 | 8.5672622   | -11.0487527 |
| C | 10.5221400 | 10.5221400  | -9.5129551  |
| C | 9.3423039  | 11.1313992  | -10.0433777 |
| C | 8.7936881  | 12.3950035  | -9.5920555  |
| C | 7.6724780  | 12.6326697  | -10.3554438 |
| C | 7.5294922  | 11.5023823  | -11.2510124 |
| N | 8.5672622  | 10.6096752  | -11.0487527 |
| C | 6.4630918  | 11.3128240  | -12.1423057 |
| C | 6.2142380  | 10.1876090  | -12.9411387 |
| C | 5.0294960  | 9.9900310   | -13.7522277 |
| C | 5.1296990  | 8.7314560   | -14.3016380 |
| C | 6.3879114  | 8.1771550   | -13.8413723 |
| N | 7.0304366  | 9.0729215   | -13.0241868 |
| C | 6.8825617  | 6.8825617   | -14.1931750 |
| H | 10.7185879 | 4.2190454   | -13.8734746 |
| H | 8.2187196  | 4.4253748   | -14.9655471 |
| H | 13.4915230 | 6.9923323   | -10.3096379 |
| H | 13.0159824 | 9.2231656   | -8.7985436  |
| H | 9.2231656  | 13.0159824  | -8.7985436  |
| H | 6.9923323  | 13.4915230  | -10.3096379 |
| H | 4.2190454  | 10.7185879  | -13.8734746 |
| H | 4.4253748  | 8.2187196   | -14.9655471 |
| C | -3.4494145 | -3.4494145  | 16.1225869  |
| C | -4.3024150 | -4.3024150  | 15.8183904  |
| C | -5.2074537 | -5.2074537  | 15.3845026  |
| C | -6.0139239 | -6.0139239  | 14.8864861  |
| C | -3.4494145 | 3.4494145   | 16.1225869  |
| C | -4.3024150 | 4.3024150   | 15.8183904  |
| C | -5.2074537 | 5.2074537   | 15.3845026  |
| C | -6.0139239 | 6.0139239   | 14.8864861  |
| C | 3.4494145  | 3.4494145   | 16.1225869  |
| C | 4.3024150  | 4.3024150   | 15.8183904  |
| C | 5.2074537  | 5.2074537   | 15.3845026  |
| C | 6.0139239  | 6.0139239   | 14.8864861  |
| C | 3.4494145  | -3.4494145  | 16.1225869  |
| C | 4.3024150  | -4.3024150  | 15.8183904  |
| C | 5.2074537  | -5.2074537  | 15.3845026  |
| C | 6.0139239  | -6.0139239  | 14.8864861  |
| C | 12.1904626 | -12.1904626 | 4.8523336   |
| C | 11.9024419 | -11.9024419 | 6.0284617   |
| C | 11.5147429 | -11.5147429 | 7.2635469   |
| C | 11.0915552 | -11.0915552 | 8.3548603   |

|   |             |             |             |
|---|-------------|-------------|-------------|
| C | 12.1904626  | -12.1904626 | -4.8523336  |
| C | 11.9024419  | -11.9024419 | -6.0284617  |
| C | 11.5147429  | -11.5147429 | -7.2635469  |
| C | 11.0915552  | -11.0915552 | -8.3548603  |
| C | -12.1904626 | 12.1904626  | 4.8523336   |
| C | -11.9024419 | 11.9024419  | 6.0284617   |
| C | -11.5147429 | 11.5147429  | 7.2635469   |
| C | -11.0915552 | 11.0915552  | 8.3548603   |
| C | -12.1904626 | 12.1904626  | -4.8523336  |
| C | -11.9024419 | 11.9024419  | -6.0284617  |
| C | -11.5147429 | 11.5147429  | -7.2635469  |
| C | -11.0915552 | 11.0915552  | -8.3548603  |
| C | 3.4494145   | 3.4494145   | -16.1225869 |
| C | 4.3024150   | 4.3024150   | -15.8183904 |
| C | 5.2074537   | 5.2074537   | -15.3845026 |
| C | 6.0139239   | 6.0139239   | -14.8864861 |
| C | -3.4494145  | 3.4494145   | -16.1225869 |
| C | -4.3024150  | 4.3024150   | -15.8183904 |
| C | -5.2074537  | 5.2074537   | -15.3845026 |
| C | -6.0139239  | 6.0139239   | -14.8864861 |
| C | -3.4494145  | -3.4494145  | -16.1225869 |
| C | -4.3024150  | -4.3024150  | -15.8183904 |
| C | -5.2074537  | -5.2074537  | -15.3845026 |
| C | -6.0139239  | -6.0139239  | -14.8864861 |
| C | 3.4494145   | -3.4494145  | -16.1225869 |
| C | 4.3024150   | -4.3024150  | -15.8183904 |
| C | 5.2074537   | -5.2074537  | -15.3845026 |
| C | 6.0139239   | -6.0139239  | -14.8864861 |
| C | 12.1904626  | 12.1904626  | 4.8523336   |
| C | 11.9024419  | 11.9024419  | 6.0284617   |
| C | 11.5147429  | 11.5147429  | 7.2635469   |
| C | 11.0915552  | 11.0915552  | 8.3548603   |
| C | 12.1904626  | 12.1904626  | -4.8523336  |
| C | 11.9024419  | 11.9024419  | -6.0284617  |
| C | 11.5147429  | 11.5147429  | -7.2635469  |
| C | 11.0915552  | 11.0915552  | -8.3548603  |
| C | -12.1904626 | -12.1904626 | -4.8523336  |
| C | -11.9024419 | -11.9024419 | -6.0284617  |
| C | -11.5147429 | -11.5147429 | -7.2635469  |
| C | -11.0915552 | -11.0915552 | -8.3548603  |
| C | -12.1904626 | -12.1904626 | 4.8523336   |
| C | -11.9024419 | -11.9024419 | 6.0284617   |
| C | -11.5147429 | -11.5147429 | 7.2635469   |
| C | -11.0915552 | -11.0915552 | 8.3548603   |
| H | 15.9351200  | -9.5317372  | 0.0000000   |
| H | 9.5317372   | -15.9351200 | 0.0000000   |
| H | -15.9351200 | 9.5317372   | 0.0000000   |
| H | -9.5317372  | 15.9351200  | 0.0000000   |
| H | 5.7119398   | -12.1154930 | 12.1821415  |

|   |             |             |             |
|---|-------------|-------------|-------------|
| H | 12.1154930  | -5.7119398  | 12.1821415  |
| H | -12.1154930 | 5.7119398   | 12.1821415  |
| H | -5.7119398  | 12.1154930  | 12.1821415  |
| H | -5.7119398  | 12.1154930  | -12.1821415 |
| H | -12.1154930 | 5.7119398   | -12.1821415 |
| H | 12.1154930  | -5.7119398  | -12.1821415 |
| H | 5.7119398   | -12.1154930 | -12.1821415 |
| H | 9.5317372   | 15.9351200  | 0.0000000   |
| H | 15.9351200  | 9.5317372   | 0.0000000   |
| H | -9.5317372  | -15.9351200 | 0.0000000   |
| H | -15.9351200 | -9.5317372  | 0.0000000   |
| H | 12.1154930  | 5.7119398   | 12.1821415  |
| H | 5.7119398   | 12.1154930  | 12.1821415  |
| H | -12.1154930 | -5.7119398  | 12.1821415  |
| H | -5.7119398  | -12.1154930 | 12.1821415  |
| H | -5.7119398  | -12.1154930 | -12.1821415 |
| H | -12.1154930 | -5.7119398  | -12.1821415 |
| H | 12.1154930  | 5.7119398   | -12.1821415 |
| H | 5.7119398   | 12.1154930  | -12.1821415 |

## Molecule 5

628

Energy =

|    |            |            |            |
|----|------------|------------|------------|
| Zn | 17.9607212 | 0.0000000  | 0.0000000  |
| C  | 17.8170663 | -3.5053242 | -2.5379167 |
| C  | 17.9401633 | -2.5378871 | -3.5104916 |
| C  | 18.0059773 | -1.2667961 | -2.8241528 |
| C  | 17.8285078 | -2.8171902 | -1.2666355 |
| N  | 17.9530981 | -1.4584165 | -1.4601336 |
| C  | 17.7096559 | -3.4647662 | 0.0000000  |
| C  | 17.8285078 | -2.8171902 | 1.2666355  |
| C  | 17.8170663 | -3.5053242 | 2.5379167  |
| C  | 17.9401633 | -2.5378871 | 3.5104916  |
| C  | 18.0059773 | -1.2667961 | 2.8241528  |
| N  | 17.9530981 | -1.4584165 | 1.4601336  |
| C  | 18.0455670 | 0.0000000  | 3.4812319  |
| C  | 18.0059773 | 1.2667961  | 2.8241528  |
| C  | 17.9401633 | 2.5378871  | 3.5104916  |
| C  | 17.8170663 | 3.5053242  | 2.5379167  |
| C  | 17.8285078 | 2.8171902  | 1.2666355  |
| N  | 17.9530981 | 1.4584165  | 1.4601336  |
| C  | 17.7096559 | 3.4647662  | 0.0000000  |
| C  | 17.8285078 | 2.8171902  | -1.2666355 |
| C  | 17.8170663 | 3.5053242  | -2.5379167 |
| C  | 17.9401633 | 2.5378871  | -3.5104916 |
| C  | 18.0059773 | 1.2667961  | -2.8241528 |
| N  | 17.9530981 | 1.4584165  | -1.4601336 |
| C  | 18.0455670 | 0.0000000  | -3.4812319 |
| H  | 17.7309584 | -4.5897964 | -2.6635919 |

|    |             |            |            |
|----|-------------|------------|------------|
| H  | 17.9710465  | -2.6662632 | -4.5975044 |
| H  | 17.7309584  | -4.5897964 | 2.6635919  |
| H  | 17.9710465  | -2.6662632 | 4.5975044  |
| H  | 17.9710465  | 2.6662632  | 4.5975044  |
| H  | 17.7309584  | 4.5897964  | 2.6635919  |
| H  | 17.7309584  | 4.5897964  | -2.6635919 |
| H  | 17.9710465  | 2.6662632  | -4.5975044 |
| Zn | -17.9607212 | 0.0000000  | 0.0000000  |
| C  | -17.8170663 | -3.5053242 | 2.5379167  |
| C  | -17.9401633 | -2.5378871 | 3.5104916  |
| C  | -18.0059773 | -1.2667961 | 2.8241528  |
| C  | -17.8285078 | -2.8171902 | 1.2666355  |
| N  | -17.9530981 | -1.4584165 | 1.4601336  |
| C  | -17.7096559 | -3.4647662 | 0.0000000  |
| C  | -17.8285078 | -2.8171902 | -1.2666355 |
| C  | -17.8170663 | -3.5053242 | -2.5379167 |
| C  | -17.9401633 | -2.5378871 | -3.5104916 |
| C  | -18.0059773 | -1.2667961 | -2.8241528 |
| N  | -17.9530981 | -1.4584165 | -1.4601336 |
| C  | -18.0455670 | 0.0000000  | -3.4812319 |
| C  | -18.0059773 | 1.2667961  | -2.8241528 |
| C  | -17.9401633 | 2.5378871  | -3.5104916 |
| C  | -17.8170663 | 3.5053242  | -2.5379167 |
| C  | -17.8285078 | 2.8171902  | -1.2666355 |
| N  | -17.9530981 | 1.4584165  | -1.4601336 |
| C  | -17.7096559 | 3.4647662  | 0.0000000  |
| C  | -17.8285078 | 2.8171902  | 1.2666355  |
| C  | -17.8170663 | 3.5053242  | 2.5379167  |
| C  | -17.9401633 | 2.5378871  | 3.5104916  |
| C  | -18.0059773 | 1.2667961  | 2.8241528  |
| N  | -17.9530981 | 1.4584165  | 1.4601336  |
| C  | -18.0455670 | 0.0000000  | 3.4812319  |
| H  | -17.7309584 | -4.5897964 | 2.6635919  |
| H  | -17.9710465 | -2.6662632 | 4.5975044  |
| H  | -17.7309584 | -4.5897964 | -2.6635919 |
| H  | -17.9710465 | -2.6662632 | -4.5975044 |
| H  | -17.9710465 | 2.6662632  | -4.5975044 |
| H  | -17.7309584 | 4.5897964  | -2.6635919 |
| H  | -17.7309584 | 4.5897964  | 2.6635919  |
| H  | -17.9710465 | 2.6662632  | 4.5975044  |
| Zn | 0.0000000   | 16.5418794 | 0.0000000  |
| C  | 2.5254933   | 16.5616449 | 3.5084333  |
| C  | 3.5032224   | 16.4379561 | 2.5468859  |
| C  | 2.8259681   | 16.4323192 | 1.2650565  |
| C  | 1.2565830   | 16.6100627 | 2.8101754  |
| N  | 1.4695140   | 16.5407267 | 1.4444589  |
| C  | 0.0000000   | 16.6635044 | 3.4303741  |
| C  | -1.2565830  | 16.6100627 | 2.8101754  |
| C  | -2.5254933  | 16.5616449 | 3.5084333  |

|    |            |             |            |
|----|------------|-------------|------------|
| C  | -3.5032224 | 16.4379561  | 2.5468859  |
| C  | -2.8259681 | 16.4323192  | 1.2650565  |
| N  | -1.4695140 | 16.5407267  | 1.4444589  |
| C  | -3.4841356 | 16.3292699  | 0.0000000  |
| C  | -2.8259681 | 16.4323192  | -1.2650565 |
| C  | -3.5032224 | 16.4379561  | -2.5468859 |
| C  | -2.5254933 | 16.5616449  | -3.5084333 |
| C  | -1.2565830 | 16.6100627  | -2.8101754 |
| N  | -1.4695140 | 16.5407267  | -1.4444589 |
| C  | 0.0000000  | 16.6635044  | -3.4303741 |
| C  | 1.2565830  | 16.6100627  | -2.8101754 |
| C  | 2.5254933  | 16.5616449  | -3.5084333 |
| C  | 3.5032224  | 16.4379561  | -2.5468859 |
| C  | 2.8259681  | 16.4323192  | -1.2650565 |
| N  | 1.4695140  | 16.5407267  | -1.4444589 |
| C  | 3.4841356  | 16.3292699  | 0.0000000  |
| H  | 2.6486538  | 16.6055688  | 4.5971229  |
| H  | 4.5875881  | 16.3632376  | 2.6819671  |
| H  | -2.6486538 | 16.6055688  | 4.5971229  |
| H  | -4.5875881 | 16.3632376  | 2.6819671  |
| H  | -4.5875881 | 16.3632376  | -2.6819671 |
| H  | -2.6486538 | 16.6055688  | -4.5971229 |
| H  | 2.6486538  | 16.6055688  | -4.5971229 |
| H  | 4.5875881  | 16.3632376  | -2.6819671 |
| Zn | 0.0000000  | -16.5418794 | 0.0000000  |
| C  | 2.5254933  | -16.5616449 | -3.5084333 |
| C  | 3.5032224  | -16.4379561 | -2.5468859 |
| C  | 2.8259681  | -16.4323192 | -1.2650565 |
| C  | 1.2565830  | -16.6100627 | -2.8101754 |
| N  | 1.4695140  | -16.5407267 | -1.4444589 |
| C  | 0.0000000  | -16.6635044 | -3.4303741 |
| C  | -1.2565830 | -16.6100627 | -2.8101754 |
| C  | -2.5254933 | -16.5616449 | -3.5084333 |
| C  | -3.5032224 | -16.4379561 | -2.5468859 |
| C  | -2.8259681 | -16.4323192 | -1.2650565 |
| N  | -1.4695140 | -16.5407267 | -1.4444589 |
| C  | -3.4841356 | -16.3292699 | 0.0000000  |
| C  | -2.8259681 | -16.4323192 | 1.2650565  |
| C  | -3.5032224 | -16.4379561 | 2.5468859  |
| C  | -2.5254933 | -16.5616449 | 3.5084333  |
| C  | -1.2565830 | -16.6100627 | 2.8101754  |
| N  | -1.4695140 | -16.5407267 | 1.4444589  |
| C  | 0.0000000  | -16.6635044 | 3.4303741  |
| C  | 1.2565830  | -16.6100627 | 2.8101754  |
| C  | 2.5254933  | -16.5616449 | 3.5084333  |
| C  | 3.5032224  | -16.4379561 | 2.5468859  |
| C  | 2.8259681  | -16.4323192 | 1.2650565  |
| N  | 1.4695140  | -16.5407267 | 1.4444589  |
| C  | 3.4841356  | -16.3292699 | 0.0000000  |

|    |            |             |            |
|----|------------|-------------|------------|
| H  | 2.6486538  | -16.6055688 | -4.5971229 |
| H  | 4.5875881  | -16.3632376 | -2.6819671 |
| H  | -2.6486538 | -16.6055688 | -4.5971229 |
| H  | -4.5875881 | -16.3632376 | -2.6819671 |
| H  | -4.5875881 | -16.3632376 | 2.6819671  |
| H  | -2.6486538 | -16.6055688 | 4.5971229  |
| H  | 2.6486538  | -16.6055688 | 4.5971229  |
| H  | 4.5875881  | -16.3632376 | 2.6819671  |
| Zn | 12.4636134 | 11.9220136  | 0.0000000  |
| C  | 15.0132942 | 9.5189177   | -2.5469242 |
| C  | 14.3714229 | 10.2672360  | -3.5080509 |
| C  | 13.4557166 | 11.1473707  | -2.8099758 |
| C  | 14.5017342 | 9.9635208   | -1.2651974 |
| N  | 13.5650456 | 10.9502156  | -1.4443573 |
| C  | 14.9178905 | 9.4434985   | 0.0000000  |
| C  | 14.5017342 | 9.9635208   | 1.2651974  |
| C  | 15.0132942 | 9.5189177   | 2.5469242  |
| C  | 14.3714229 | 10.2672360  | 3.5080509  |
| C  | 13.4557166 | 11.1473707  | 2.8099758  |
| N  | 13.5650456 | 10.9502156  | 1.4443573  |
| C  | 12.5517491 | 12.0218102  | 3.4297684  |
| C  | 11.5697030 | 12.8082335  | 2.8095897  |
| C  | 10.5823243 | 13.6066541  | 3.5078284  |
| C  | 9.7596598  | 14.1503272  | 2.5466670  |
| C  | 10.2640236 | 13.6980268  | 1.2650671  |
| N  | 11.3600446 | 12.8914562  | 1.4443377  |
| C  | 9.6967282  | 14.0475890  | 0.0000000  |
| C  | 10.2640236 | 13.6980268  | -1.2650671 |
| C  | 9.7596598  | 14.1503272  | -2.5466670 |
| C  | 10.5823243 | 13.6066541  | -3.5078284 |
| C  | 11.5697030 | 12.8082335  | -2.8095897 |
| N  | 11.3600446 | 12.8914562  | -1.4443377 |
| C  | 12.5517491 | 12.0218102  | -3.4297684 |
| H  | 15.7708169 | 8.7394466   | -2.6822559 |
| H  | 14.4957621 | 10.2208695  | -4.5964917 |
| H  | 15.7708169 | 8.7394466   | 2.6822559  |
| H  | 14.4957621 | 10.2208695  | 4.5964917  |
| H  | 10.5212037 | 13.7244801  | 4.5962683  |
| H  | 8.8920951  | 14.8050926  | 2.6819928  |
| H  | 8.8920951  | 14.8050926  | -2.6819928 |
| H  | 10.5212037 | 13.7244801  | -4.5962683 |
| Zn | 12.4636134 | -11.9220136 | 0.0000000  |
| C  | 14.3714229 | -10.2672360 | -3.5080509 |
| C  | 15.0132942 | -9.5189177  | -2.5469242 |
| C  | 14.5017342 | -9.9635208  | -1.2651974 |
| C  | 13.4557166 | -11.1473707 | -2.8099758 |
| N  | 13.5650456 | -10.9502156 | -1.4443573 |
| C  | 12.5517491 | -12.0218102 | -3.4297684 |
| C  | 11.5697030 | -12.8082335 | -2.8095897 |

|    |             |             |            |
|----|-------------|-------------|------------|
| C  | 10.5823243  | -13.6066541 | -3.5078284 |
| C  | 9.7596598   | -14.1503272 | -2.5466670 |
| C  | 10.2640236  | -13.6980268 | -1.2650671 |
| N  | 11.3600446  | -12.8914562 | -1.4443377 |
| C  | 9.6967282   | -14.0475890 | 0.0000000  |
| C  | 10.2640236  | -13.6980268 | 1.2650671  |
| C  | 9.7596598   | -14.1503272 | 2.5466670  |
| C  | 10.5823243  | -13.6066541 | 3.5078284  |
| C  | 11.5697030  | -12.8082335 | 2.8095897  |
| N  | 11.3600446  | -12.8914562 | 1.4443377  |
| C  | 12.5517491  | -12.0218102 | 3.4297684  |
| C  | 13.4557166  | -11.1473707 | 2.8099758  |
| C  | 14.3714229  | -10.2672360 | 3.5080509  |
| C  | 15.0132942  | -9.5189177  | 2.5469242  |
| C  | 14.5017342  | -9.9635208  | 1.2651974  |
| N  | 13.5650456  | -10.9502156 | 1.4443573  |
| C  | 14.9178905  | -9.4434985  | 0.0000000  |
| H  | 14.4957621  | -10.2208695 | -4.5964917 |
| H  | 15.7708169  | -8.7394466  | -2.6822559 |
| H  | 10.5212037  | -13.7244801 | -4.5962683 |
| H  | 8.8920951   | -14.8050926 | -2.6819928 |
| H  | 8.8920951   | -14.8050926 | 2.6819928  |
| H  | 10.5212037  | -13.7244801 | 4.5962683  |
| H  | 14.4957621  | -10.2208695 | 4.5964917  |
| H  | 15.7708169  | -8.7394466  | 2.6822559  |
| Zn | -12.4636134 | -11.9220136 | 0.0000000  |
| C  | -9.7596598  | -14.1503272 | 2.5466670  |
| C  | -10.5823243 | -13.6066541 | 3.5078284  |
| C  | -11.5697030 | -12.8082335 | 2.8095897  |
| C  | -10.2640236 | -13.6980268 | 1.2650671  |
| N  | -11.3600446 | -12.8914562 | 1.4443377  |
| C  | -9.6967282  | -14.0475890 | 0.0000000  |
| C  | -10.2640236 | -13.6980268 | -1.2650671 |
| C  | -9.7596598  | -14.1503272 | -2.5466670 |
| C  | -10.5823243 | -13.6066541 | -3.5078284 |
| C  | -11.5697030 | -12.8082335 | -2.8095897 |
| N  | -11.3600446 | -12.8914562 | -1.4443377 |
| C  | -12.5517491 | -12.0218102 | -3.4297684 |
| C  | -13.4557166 | -11.1473707 | -2.8099758 |
| C  | -14.3714229 | -10.2672360 | -3.5080509 |
| C  | -15.0132942 | -9.5189177  | -2.5469242 |
| C  | -14.5017342 | -9.9635208  | -1.2651974 |
| N  | -13.5650456 | -10.9502156 | -1.4443573 |
| C  | -14.9178905 | -9.4434985  | 0.0000000  |
| C  | -14.5017342 | -9.9635208  | 1.2651974  |
| C  | -15.0132942 | -9.5189177  | 2.5469242  |
| C  | -14.3714229 | -10.2672360 | 3.5080509  |
| C  | -13.4557166 | -11.1473707 | 2.8099758  |
| N  | -13.5650456 | -10.9502156 | 1.4443573  |



|    |             |             |            |
|----|-------------|-------------|------------|
| C  | -12.5517491 | -12.0218102 | 3.4297684  |
| H  | -8.8920951  | -14.8050926 | 2.6819928  |
| H  | -10.5212037 | -13.7244801 | 4.5962683  |
| H  | -8.8920951  | -14.8050926 | -2.6819928 |
| H  | -10.5212037 | -13.7244801 | -4.5962683 |
| H  | -14.4957621 | -10.2208695 | -4.5964917 |
| H  | -15.7708169 | -8.7394466  | -2.6822559 |
| H  | -15.7708169 | -8.7394466  | 2.6822559  |
| H  | -14.4957621 | -10.2208695 | 4.5964917  |
| Zn | -12.4636134 | 11.9220136  | 0.0000000  |
| C  | -10.5823243 | 13.6066541  | 3.5078284  |
| C  | -9.7596598  | 14.1503272  | 2.5466670  |
| C  | -10.2640236 | 13.6980268  | 1.2650671  |
| C  | -11.5697030 | 12.8082335  | 2.8095897  |
| N  | -11.3600446 | 12.8914562  | 1.4443377  |
| C  | -12.5517491 | 12.0218102  | 3.4297684  |
| C  | -13.4557166 | 11.1473707  | 2.8099758  |
| C  | -14.3714229 | 10.2672360  | 3.5080509  |
| C  | -15.0132942 | 9.5189177   | 2.5469242  |
| C  | -14.5017342 | 9.9635208   | 1.2651974  |
| N  | -13.5650456 | 10.9502156  | 1.4443573  |
| C  | -14.9178905 | 9.4434985   | 0.0000000  |
| C  | -14.5017342 | 9.9635208   | -1.2651974 |
| C  | -15.0132942 | 9.5189177   | -2.5469242 |
| C  | -14.3714229 | 10.2672360  | -3.5080509 |
| C  | -13.4557166 | 11.1473707  | -2.8099758 |
| N  | -13.5650456 | 10.9502156  | -1.4443573 |
| C  | -12.5517491 | 12.0218102  | -3.4297684 |
| C  | -11.5697030 | 12.8082335  | -2.8095897 |
| C  | -10.5823243 | 13.6066541  | -3.5078284 |
| C  | -9.7596598  | 14.1503272  | -2.5466670 |
| C  | -10.2640236 | 13.6980268  | -1.2650671 |
| N  | -11.3600446 | 12.8914562  | -1.4443377 |
| C  | -9.6967282  | 14.0475890  | 0.0000000  |
| H  | -10.5212037 | 13.7244801  | 4.5962683  |
| H  | -8.8920951  | 14.8050926  | 2.6819928  |
| H  | -14.4957621 | 10.2208695  | 4.5964917  |
| H  | -15.7708169 | 8.7394466   | 2.6822559  |
| H  | -15.7708169 | 8.7394466   | -2.6822559 |
| H  | -14.4957621 | 10.2208695  | -4.5964917 |
| H  | -10.5212037 | 13.7244801  | -4.5962683 |
| H  | -8.8920951  | 14.8050926  | -2.6819928 |
| Zn | 15.9578477  | 0.0000000   | 13.3259844 |
| C  | 17.0120134  | -3.5088676  | 11.0309823 |
| C  | 17.3065630  | -2.5470937  | 10.0909658 |
| C  | 17.0220826  | -1.2652122  | 10.7060156 |
| C  | 16.5317883  | -2.8108349  | 12.2067307 |
| N  | 16.5577811  | -1.4448390  | 11.9849278 |
| C  | 16.0640011  | -3.4310862  | 13.3737832 |

|    |            |            |             |
|----|------------|------------|-------------|
| C  | 15.5029072 | -2.8105186 | 14.4993883  |
| C  | 14.9407128 | -3.5086247 | 15.6379578  |
| C  | 14.4316197 | -2.5467334 | 16.4814544  |
| C  | 14.7043013 | -1.2650971 | 15.8613334  |
| N  | 15.3553096 | -1.4447637 | 14.6663563  |
| C  | 14.3432590 | 0.0000000  | 16.4208659  |
| C  | 14.7043013 | 1.2650971  | 15.8613334  |
| C  | 14.4316197 | 2.5467334  | 16.4814544  |
| C  | 14.9407128 | 3.5086247  | 15.6379578  |
| C  | 15.5029072 | 2.8105186  | 14.4993883  |
| N  | 15.3553096 | 1.4447637  | 14.6663563  |
| C  | 16.0640011 | 3.4310862  | 13.3737832  |
| C  | 16.5317883 | 2.8108349  | 12.2067307  |
| C  | 17.0120134 | 3.5088676  | 11.0309823  |
| C  | 17.3065630 | 2.5470937  | 10.0909658  |
| C  | 17.0220826 | 1.2652122  | 10.7060156  |
| N  | 16.5577811 | 1.4448390  | 11.9849278  |
| C  | 17.2051454 | 0.0000000  | 10.0660780  |
| H  | 17.1018788 | -4.5975768 | 10.9363647  |
| H  | 17.6886809 | -2.6819689 | 9.0733904   |
| H  | 14.9288877 | -4.5973781 | 15.7675599  |
| H  | 13.9219207 | -2.6814740 | 17.4415149  |
| H  | 13.9219207 | 2.6814740  | 17.4415149  |
| H  | 14.9288877 | 4.5973781  | 15.7675599  |
| H  | 17.1018788 | 4.5975768  | 10.9363647  |
| H  | 17.6886809 | 2.6819689  | 9.0733904   |
| Zn | 15.9578477 | 0.0000000  | -13.3259844 |
| C  | 14.9407128 | -3.5086247 | -15.6379578 |
| C  | 14.4316197 | -2.5467334 | -16.4814544 |
| C  | 14.7043013 | -1.2650971 | -15.8613334 |
| C  | 15.5029072 | -2.8105186 | -14.4993883 |
| N  | 15.3553096 | -1.4447637 | -14.6663563 |
| C  | 16.0640011 | -3.4310862 | -13.3737832 |
| C  | 16.5317883 | -2.8108349 | -12.2067307 |
| C  | 17.0120134 | -3.5088676 | -11.0309823 |
| C  | 17.3065630 | -2.5470937 | -10.0909658 |
| C  | 17.0220826 | -1.2652122 | -10.7060156 |
| N  | 16.5577811 | -1.4448390 | -11.9849278 |
| C  | 17.2051454 | 0.0000000  | -10.0660780 |
| C  | 17.0220826 | 1.2652122  | -10.7060156 |
| C  | 17.3065630 | 2.5470937  | -10.0909658 |
| C  | 17.0120134 | 3.5088676  | -11.0309823 |
| C  | 16.5317883 | 2.8108349  | -12.2067307 |
| N  | 16.5577811 | 1.4448390  | -11.9849278 |
| C  | 16.0640011 | 3.4310862  | -13.3737832 |
| C  | 15.5029072 | 2.8105186  | -14.4993883 |
| C  | 14.9407128 | 3.5086247  | -15.6379578 |
| C  | 14.4316197 | 2.5467334  | -16.4814544 |
| C  | 14.7043013 | 1.2650971  | -15.8613334 |

|    |             |            |             |
|----|-------------|------------|-------------|
| N  | 15.3553096  | 1.4447637  | -14.6663563 |
| C  | 14.3432590  | 0.0000000  | -16.4208659 |
| H  | 14.9288877  | -4.5973781 | -15.7675599 |
| H  | 13.9219207  | -2.6814740 | -17.4415149 |
| H  | 17.1018788  | -4.5975768 | -10.9363647 |
| H  | 17.6886809  | -2.6819689 | -9.0733904  |
| H  | 17.6886809  | 2.6819689  | -9.0733904  |
| H  | 17.1018788  | 4.5975768  | -10.9363647 |
| H  | 14.9288877  | 4.5973781  | -15.7675599 |
| H  | 13.9219207  | 2.6814740  | -17.4415149 |
| Zn | -15.9578477 | 0.0000000  | -13.3259844 |
| C  | -17.0120134 | -3.5088676 | -11.0309823 |
| C  | -17.3065630 | -2.5470937 | -10.0909658 |
| C  | -17.0220826 | -1.2652122 | -10.7060156 |
| C  | -16.5317883 | -2.8108349 | -12.2067307 |
| N  | -16.5577811 | -1.4448390 | -11.9849278 |
| C  | -16.0640011 | -3.4310862 | -13.3737832 |
| C  | -15.5029072 | -2.8105186 | -14.4993883 |
| C  | -14.9407128 | -3.5086247 | -15.6379578 |
| C  | -14.4316197 | -2.5467334 | -16.4814544 |
| C  | -14.7043013 | -1.2650971 | -15.8613334 |
| N  | -15.3553096 | -1.4447637 | -14.6663563 |
| C  | -14.3432590 | 0.0000000  | -16.4208659 |
| C  | -14.7043013 | 1.2650971  | -15.8613334 |
| C  | -14.4316197 | 2.5467334  | -16.4814544 |
| C  | -14.9407128 | 3.5086247  | -15.6379578 |
| C  | -15.5029072 | 2.8105186  | -14.4993883 |
| N  | -15.3553096 | 1.4447637  | -14.6663563 |
| C  | -16.0640011 | 3.4310862  | -13.3737832 |
| C  | -16.5317883 | 2.8108349  | -12.2067307 |
| C  | -17.0120134 | 3.5088676  | -11.0309823 |
| C  | -17.3065630 | 2.5470937  | -10.0909658 |
| C  | -17.0220826 | 1.2652122  | -10.7060156 |
| N  | -16.5577811 | 1.4448390  | -11.9849278 |
| C  | -17.2051454 | 0.0000000  | -10.0660780 |
| H  | -17.1018788 | -4.5975768 | -10.9363647 |
| H  | -17.6886809 | -2.6819689 | -9.0733904  |
| H  | -14.9288877 | -4.5973781 | -15.7675599 |
| H  | -13.9219207 | -2.6814740 | -17.4415149 |
| H  | -13.9219207 | 2.6814740  | -17.4415149 |
| H  | -14.9288877 | 4.5973781  | -15.7675599 |
| H  | -17.1018788 | 4.5975768  | -10.9363647 |
| H  | -17.6886809 | 2.6819689  | -9.0733904  |
| Zn | -15.9578477 | 0.0000000  | 13.3259844  |
| C  | -14.9407128 | -3.5086247 | 15.6379578  |
| C  | -14.4316197 | -2.5467334 | 16.4814544  |
| C  | -14.7043013 | -1.2650971 | 15.8613334  |
| C  | -15.5029072 | -2.8105186 | 14.4993883  |
| N  | -15.3553096 | -1.4447637 | 14.6663563  |

|    |             |            |            |
|----|-------------|------------|------------|
| C  | -16.0640011 | -3.4310862 | 13.3737832 |
| C  | -16.5317883 | -2.8108349 | 12.2067307 |
| C  | -17.0120134 | -3.5088676 | 11.0309823 |
| C  | -17.3065630 | -2.5470937 | 10.0909658 |
| C  | -17.0220826 | -1.2652122 | 10.7060156 |
| N  | -16.5577811 | -1.4448390 | 11.9849278 |
| C  | -17.2051454 | 0.0000000  | 10.0660780 |
| C  | -17.0220826 | 1.2652122  | 10.7060156 |
| C  | -17.3065630 | 2.5470937  | 10.0909658 |
| C  | -17.0120134 | 3.5088676  | 11.0309823 |
| C  | -16.5317883 | 2.8108349  | 12.2067307 |
| N  | -16.5577811 | 1.4448390  | 11.9849278 |
| C  | -16.0640011 | 3.4310862  | 13.3737832 |
| C  | -15.5029072 | 2.8105186  | 14.4993883 |
| C  | -14.9407128 | 3.5086247  | 15.6379578 |
| C  | -14.4316197 | 2.5467334  | 16.4814544 |
| C  | -14.7043013 | 1.2650971  | 15.8613334 |
| N  | -15.3553096 | 1.4447637  | 14.6663563 |
| C  | -14.3432590 | 0.0000000  | 16.4208659 |
| H  | -14.9288877 | -4.5973781 | 15.7675599 |
| H  | -13.9219207 | -2.6814740 | 17.4415149 |
| H  | -17.1018788 | -4.5975768 | 10.9363647 |
| H  | -17.6886809 | -2.6819689 | 9.0733904  |
| H  | -17.6886809 | 2.6819689  | 9.0733904  |
| H  | -17.1018788 | 4.5975768  | 10.9363647 |
| H  | -14.9288877 | 4.5973781  | 15.7675599 |
| H  | -13.9219207 | 2.6814740  | 17.4415149 |
| Zn | 6.5976401   | 0.0000000  | 22.7236268 |
| C  | 8.9279492   | -3.5076859 | 21.7506354 |
| C  | 9.7697266   | -2.5466345 | 21.2368571 |
| C  | 9.1438586   | -1.2651378 | 21.4972358 |
| C  | 7.7830320   | -2.8097426 | 22.3003338 |
| N  | 7.9466692   | -1.4444116 | 22.1438460 |
| C  | 6.6518989   | -3.4296864 | 22.8506900 |
| C  | 5.4726642   | -2.8096522 | 23.2886608 |
| C  | 4.2841548   | -3.5075815 | 23.7363141 |
| C  | 3.3311857   | -2.5464759 | 23.9898802 |
| C  | 3.9520335   | -1.2650817 | 23.7177725 |
| N  | 5.2466718   | -1.4443752 | 23.2992660 |
| C  | 3.3027107   | 0.0000000  | 23.8668193 |
| C  | 3.9520335   | 1.2650817  | 23.7177725 |
| C  | 3.3311857   | 2.5464759  | 23.9898802 |
| C  | 4.2841548   | 3.5075815  | 23.7363141 |
| C  | 5.4726642   | 2.8096522  | 23.2886608 |
| N  | 5.2466718   | 1.4443752  | 23.2992660 |
| C  | 6.6518989   | 3.4296864  | 22.8506900 |
| C  | 7.7830320   | 2.8097426  | 22.3003338 |
| C  | 8.9279492   | 3.5076859  | 21.7506354 |
| C  | 9.7697266   | 2.5466345  | 21.2368571 |

|    |            |            |             |
|----|------------|------------|-------------|
| C  | 9.1438586  | 1.2651378  | 21.4972358  |
| N  | 7.9466692  | 1.4444116  | 22.1438460  |
| C  | 9.7006257  | 0.0000000  | 21.1312641  |
| H  | 9.0620525  | -4.5959774 | 21.7482230  |
| H  | 10.7326784 | -2.6818540 | 20.7326261  |
| H  | 4.1896212  | -4.5958647 | 23.8313033  |
| H  | 2.3012722  | -2.6816072 | 24.3372588  |
| H  | 2.3012722  | 2.6816072  | 24.3372588  |
| H  | 4.1896212  | 4.5958647  | 23.8313033  |
| H  | 9.0620525  | 4.5959774  | 21.7482230  |
| H  | 10.7326784 | 2.6818540  | 20.7326261  |
| Zn | 6.5976401  | 0.0000000  | -22.7236268 |
| C  | 4.2841548  | -3.5075815 | -23.7363141 |
| C  | 3.3311857  | -2.5464759 | -23.9898802 |
| C  | 3.9520335  | -1.2650817 | -23.7177725 |
| C  | 5.4726642  | -2.8096522 | -23.2886608 |
| N  | 5.2466718  | -1.4443752 | -23.2992660 |
| C  | 6.6518989  | -3.4296864 | -22.8506900 |
| C  | 7.7830320  | -2.8097426 | -22.3003338 |
| C  | 8.9279492  | -3.5076859 | -21.7506354 |
| C  | 9.7697266  | -2.5466345 | -21.2368571 |
| C  | 9.1438586  | -1.2651378 | -21.4972358 |
| N  | 7.9466692  | -1.4444116 | -22.1438460 |
| C  | 9.7006257  | 0.0000000  | -21.1312641 |
| C  | 9.1438586  | 1.2651378  | -21.4972358 |
| C  | 9.7697266  | 2.5466345  | -21.2368571 |
| C  | 8.9279492  | 3.5076859  | -21.7506354 |
| C  | 7.7830320  | 2.8097426  | -22.3003338 |
| N  | 7.9466692  | 1.4444116  | -22.1438460 |
| C  | 6.6518989  | 3.4296864  | -22.8506900 |
| C  | 5.4726642  | 2.8096522  | -23.2886608 |
| C  | 4.2841548  | 3.5075815  | -23.7363141 |
| C  | 3.3311857  | 2.5464759  | -23.9898802 |
| C  | 3.9520335  | 1.2650817  | -23.7177725 |
| N  | 5.2466718  | 1.4443752  | -23.2992660 |
| C  | 3.3027107  | 0.0000000  | -23.8668193 |
| H  | 4.1896212  | -4.5958647 | -23.8313033 |
| H  | 2.3012722  | -2.6816072 | -24.3372588 |
| H  | 9.0620525  | -4.5959774 | -21.7482230 |
| H  | 10.7326784 | -2.6818540 | -20.7326261 |
| H  | 10.7326784 | 2.6818540  | -20.7326261 |
| H  | 9.0620525  | 4.5959774  | -21.7482230 |
| H  | 4.1896212  | 4.5958647  | -23.8313033 |
| H  | 2.3012722  | 2.6816072  | -24.3372588 |
| Zn | -6.5976401 | 0.0000000  | -22.7236268 |
| C  | -8.9279492 | -3.5076859 | -21.7506354 |
| C  | -9.7697266 | -2.5466345 | -21.2368571 |
| C  | -9.1438586 | -1.2651378 | -21.4972358 |
| C  | -7.7830320 | -2.8097426 | -22.3003338 |

|    |             |            |             |
|----|-------------|------------|-------------|
| N  | -7.9466692  | -1.4444116 | -22.1438460 |
| C  | -6.6518989  | -3.4296864 | -22.8506900 |
| C  | -5.4726642  | -2.8096522 | -23.2886608 |
| C  | -4.2841548  | -3.5075815 | -23.7363141 |
| C  | -3.3311857  | -2.5464759 | -23.9898802 |
| C  | -3.9520335  | -1.2650817 | -23.7177725 |
| N  | -5.2466718  | -1.4443752 | -23.2992660 |
| C  | -3.3027107  | 0.0000000  | -23.8668193 |
| C  | -3.9520335  | 1.2650817  | -23.7177725 |
| C  | -3.3311857  | 2.5464759  | -23.9898802 |
| C  | -4.2841548  | 3.5075815  | -23.7363141 |
| C  | -5.4726642  | 2.8096522  | -23.2886608 |
| N  | -5.2466718  | 1.4443752  | -23.2992660 |
| C  | -6.6518989  | 3.4296864  | -22.8506900 |
| C  | -7.7830320  | 2.8097426  | -22.3003338 |
| C  | -8.9279492  | 3.5076859  | -21.7506354 |
| C  | -9.7697266  | 2.5466345  | -21.2368571 |
| C  | -9.1438586  | 1.2651378  | -21.4972358 |
| N  | -7.9466692  | 1.4444116  | -22.1438460 |
| C  | -9.7006257  | 0.0000000  | -21.1312641 |
| H  | -9.0620525  | -4.5959774 | -21.7482230 |
| H  | -10.7326784 | -2.6818540 | -20.7326261 |
| H  | -4.1896212  | -4.5958647 | -23.8313033 |
| H  | -2.3012722  | -2.6816072 | -24.3372588 |
| H  | -2.3012722  | 2.6816072  | -24.3372588 |
| H  | -4.1896212  | 4.5958647  | -23.8313033 |
| H  | -9.0620525  | 4.5959774  | -21.7482230 |
| H  | -10.7326784 | 2.6818540  | -20.7326261 |
| Zn | -6.5976401  | 0.0000000  | 22.7236268  |
| C  | -4.2841548  | -3.5075815 | 23.7363141  |
| C  | -3.3311857  | -2.5464759 | 23.9898802  |
| C  | -3.9520335  | -1.2650817 | 23.7177725  |
| C  | -5.4726642  | -2.8096522 | 23.2886608  |
| N  | -5.2466718  | -1.4443752 | 23.2992660  |
| C  | -6.6518989  | -3.4296864 | 22.8506900  |
| C  | -7.7830320  | -2.8097426 | 22.3003338  |
| C  | -8.9279492  | -3.5076859 | 21.7506354  |
| C  | -9.7697266  | -2.5466345 | 21.2368571  |
| C  | -9.1438586  | -1.2651378 | 21.4972358  |
| N  | -7.9466692  | -1.4444116 | 22.1438460  |
| C  | -9.7006257  | 0.0000000  | 21.1312641  |
| C  | -9.1438586  | 1.2651378  | 21.4972358  |
| C  | -9.7697266  | 2.5466345  | 21.2368571  |
| C  | -8.9279492  | 3.5076859  | 21.7506354  |
| C  | -7.7830320  | 2.8097426  | 22.3003338  |
| N  | -7.9466692  | 1.4444116  | 22.1438460  |
| C  | -6.6518989  | 3.4296864  | 22.8506900  |
| C  | -5.4726642  | 2.8096522  | 23.2886608  |
| C  | -4.2841548  | 3.5075815  | 23.7363141  |

|   |             |            |            |
|---|-------------|------------|------------|
| C | -3.3311857  | 2.5464759  | 23.9898802 |
| C | -3.9520335  | 1.2650817  | 23.7177725 |
| N | -5.2466718  | 1.4443752  | 23.2992660 |
| C | -3.3027107  | 0.0000000  | 23.8668193 |
| H | -4.1896212  | -4.5958647 | 23.8313033 |
| H | -2.3012722  | -2.6816072 | 24.3372588 |
| H | -9.0620525  | -4.5959774 | 21.7482230 |
| H | -10.7326784 | -2.6818540 | 20.7326261 |
| H | -10.7326784 | 2.6818540  | 20.7326261 |
| H | -9.0620525  | 4.5959774  | 21.7482230 |
| H | -4.1896212  | 4.5958647  | 23.8313033 |
| H | -2.3012722  | 2.6816072  | 24.3372588 |
| C | 17.3802426  | -4.8376786 | 0.0000000  |
| C | 16.9495189  | -6.0051254 | 0.0000000  |
| C | 16.3761836  | -7.2288507 | 0.0000000  |
| C | 15.7497134  | -8.3043081 | 0.0000000  |
| C | 18.0272655  | 0.0000000  | 4.8929925  |
| C | 17.9405001  | 0.0000000  | 6.1337596  |
| C | 17.7759963  | 0.0000000  | 7.4751141  |
| C | 17.5552626  | 0.0000000  | 8.6996279  |
| C | 17.3802426  | 4.8376786  | 0.0000000  |
| C | 16.9495189  | 6.0051254  | 0.0000000  |
| C | 16.3761836  | 7.2288507  | 0.0000000  |
| C | 15.7497134  | 8.3043081  | 0.0000000  |
| C | 18.0272655  | 0.0000000  | -4.8929925 |
| C | 17.9405001  | 0.0000000  | -6.1337596 |
| C | 17.7759963  | 0.0000000  | -7.4751141 |
| C | 17.5552626  | 0.0000000  | -8.6996279 |
| C | -17.3802426 | -4.8376786 | 0.0000000  |
| C | -16.9495189 | -6.0051254 | 0.0000000  |
| C | -16.3761836 | -7.2288507 | 0.0000000  |
| C | -15.7497134 | -8.3043081 | 0.0000000  |
| C | -18.0272655 | 0.0000000  | -4.8929925 |
| C | -17.9405001 | 0.0000000  | -6.1337596 |
| C | -17.7759963 | 0.0000000  | -7.4751141 |
| C | -17.5552626 | 0.0000000  | -8.6996279 |
| C | -17.3802426 | 4.8376786  | 0.0000000  |
| C | -16.9495189 | 6.0051254  | 0.0000000  |
| C | -16.3761836 | 7.2288507  | 0.0000000  |
| C | -15.7497134 | 8.3043081  | 0.0000000  |
| C | -18.0272655 | 0.0000000  | 4.8929925  |
| C | -17.9405001 | 0.0000000  | 6.1337596  |
| C | -17.7759963 | 0.0000000  | 7.4751141  |
| C | -17.5552626 | 0.0000000  | 8.6996279  |
| C | -4.8691765  | 16.0615946 | 0.0000000  |
| C | -6.0654426  | 15.7183155 | 0.0000000  |
| C | -7.3344466  | 15.2536256 | 0.0000000  |
| C | -8.4695636  | 14.7432813 | 0.0000000  |
| C | 4.8691765   | 16.0615946 | 0.0000000  |

|   |             |             |             |
|---|-------------|-------------|-------------|
| C | 6.0654426   | 15.7183155  | 0.0000000   |
| C | 7.3344466   | 15.2536256  | 0.0000000   |
| C | 8.4695636   | 14.7432813  | 0.0000000   |
| C | -4.8691765  | -16.0615946 | 0.0000000   |
| C | -6.0654426  | -15.7183155 | 0.0000000   |
| C | -7.3344466  | -15.2536256 | 0.0000000   |
| C | -8.4695636  | -14.7432813 | 0.0000000   |
| C | 4.8691765   | -16.0615946 | 0.0000000   |
| C | 6.0654426   | -15.7183155 | 0.0000000   |
| C | 7.3344466   | -15.2536256 | 0.0000000   |
| C | 8.4695636   | -14.7432813 | 0.0000000   |
| C | 13.5347708  | 0.0000000   | 17.5767211  |
| C | 12.7315046  | 0.0000000   | 18.5272517  |
| C | 11.7848985  | 0.0000000   | 19.4915798  |
| C | 10.8481272  | 0.0000000   | 20.3110246  |
| C | 13.5347708  | 0.0000000   | -17.5767211 |
| C | 12.7315046  | 0.0000000   | -18.5272517 |
| C | 11.7848985  | 0.0000000   | -19.4915798 |
| C | 10.8481272  | 0.0000000   | -20.3110246 |
| C | -13.5347708 | 0.0000000   | -17.5767211 |
| C | -12.7315046 | 0.0000000   | -18.5272517 |
| C | -11.7848985 | 0.0000000   | -19.4915798 |
| C | -10.8481272 | 0.0000000   | -20.3110246 |
| C | -13.5347708 | 0.0000000   | 17.5767211  |
| C | -12.7315046 | 0.0000000   | 18.5272517  |
| C | -11.7848985 | 0.0000000   | 19.4915798  |
| C | -10.8481272 | 0.0000000   | 20.3110246  |
| C | 1.9161031   | 0.0000000   | 24.1248644  |
| C | 0.6756228   | 0.0000000   | 24.2258685  |
| C | -0.6756228  | 0.0000000   | 24.2258685  |
| C | -1.9161031  | 0.0000000   | 24.1248644  |
| C | 1.9161031   | 0.0000000   | -24.1248644 |
| C | 0.6756228   | 0.0000000   | -24.2258685 |
| C | -0.6756228  | 0.0000000   | -24.2258685 |
| C | -1.9161031  | 0.0000000   | -24.1248644 |
| H | 0.0000000   | 16.7100262  | 4.5294492   |
| H | 0.0000000   | 16.7100262  | -4.5294492  |
| H | 0.0000000   | -16.7100262 | -4.5294492  |
| H | 0.0000000   | -16.7100262 | 4.5294492   |
| H | 12.5851394  | 12.0599810  | 4.5286581   |
| H | 12.5851394  | 12.0599810  | -4.5286581  |
| H | 12.5851394  | -12.0599810 | -4.5286581  |
| H | 12.5851394  | -12.0599810 | 4.5286581   |
| H | -12.5851394 | -12.0599810 | -4.5286581  |
| H | -12.5851394 | -12.0599810 | 4.5286581   |
| H | -12.5851394 | 12.0599810  | 4.5286581   |
| H | -12.5851394 | 12.0599810  | -4.5286581  |
| H | 16.1051327  | -4.5302065  | 13.3923376  |
| H | 16.1051327  | 4.5302065   | 13.3923376  |



|   |             |            |             |
|---|-------------|------------|-------------|
| H | 16.1051327  | -4.5302065 | -13.3923376 |
| H | 16.1051327  | 4.5302065  | -13.3923376 |
| H | -16.1051327 | -4.5302065 | -13.3923376 |
| H | -16.1051327 | 4.5302065  | -13.3923376 |
| H | -16.1051327 | -4.5302065 | 13.3923376  |
| H | -16.1051327 | 4.5302065  | 13.3923376  |
| H | 6.6728399   | -4.5284502 | 22.8996957  |
| H | 6.6728399   | 4.5284502  | 22.8996957  |
| H | 6.6728399   | -4.5284502 | -22.8996957 |
| H | 6.6728399   | 4.5284502  | -22.8996957 |
| H | -6.6728399  | -4.5284502 | -22.8996957 |
| H | -6.6728399  | 4.5284502  | -22.8996957 |
| H | -6.6728399  | -4.5284502 | 22.8996957  |
| H | -6.6728399  | 4.5284502  | 22.8996957  |

## Molecule 6

706

Energy =

|    |            |            |            |
|----|------------|------------|------------|
| Zn | -0.0000000 | 0.0000000  | 20.8247938 |
| C  | 2.5386225  | -3.5122541 | 20.7511749 |
| C  | 3.5122541  | -2.5386225 | 20.7511749 |
| C  | 2.8254408  | -1.2668010 | 20.7852320 |
| C  | 1.2668010  | -2.8254408 | 20.7852320 |
| N  | 1.4610322  | -1.4610322 | 20.8176035 |
| C  | 0.0000000  | -3.4815184 | 20.7477999 |
| C  | -1.2668010 | -2.8254408 | 20.7852320 |
| C  | -2.5386225 | -3.5122541 | 20.7511749 |
| C  | -3.5122541 | -2.5386225 | 20.7511749 |
| C  | -2.8254408 | -1.2668010 | 20.7852320 |
| N  | -1.4610322 | -1.4610322 | 20.8176035 |
| C  | -3.4815184 | 0.0000000  | 20.7477999 |
| C  | -2.8254408 | 1.2668010  | 20.7852320 |
| C  | -3.5122541 | 2.5386225  | 20.7511749 |
| C  | -2.5386225 | 3.5122541  | 20.7511749 |
| C  | -1.2668010 | 2.8254408  | 20.7852320 |
| N  | -1.4610322 | 1.4610322  | 20.8176035 |
| C  | -0.0000000 | 3.4815184  | 20.7477999 |
| C  | 1.2668010  | 2.8254408  | 20.7852320 |
| C  | 2.5386225  | 3.5122541  | 20.7511749 |
| C  | 3.5122541  | 2.5386225  | 20.7511749 |
| C  | 2.8254408  | 1.2668010  | 20.7852320 |
| N  | 1.4610322  | 1.4610322  | 20.8176035 |
| C  | 3.4815184  | 0.0000000  | 20.7477999 |
| H  | 2.6636871  | -4.5998289 | 20.7268269 |
| H  | 4.5998289  | -2.6636871 | 20.7268269 |
| H  | -2.6636871 | -4.5998289 | 20.7268269 |
| H  | -4.5998289 | -2.6636871 | 20.7268269 |
| H  | -4.5998289 | 2.6636871  | 20.7268269 |
| H  | -2.6636871 | 4.5998289  | 20.7268269 |

|    |            |            |             |
|----|------------|------------|-------------|
| H  | 2.6636871  | 4.5998289  | 20.7268269  |
| H  | 4.5998289  | 2.6636871  | 20.7268269  |
| Zn | -0.0000000 | 0.0000000  | -20.8247938 |
| C  | 2.5386225  | 3.5122541  | -20.7511749 |
| C  | 3.5122541  | 2.5386225  | -20.7511749 |
| C  | 2.8254408  | 1.2668010  | -20.7852320 |
| C  | 1.2668010  | 2.8254408  | -20.7852320 |
| N  | 1.4610322  | 1.4610322  | -20.8176035 |
| C  | -0.0000000 | 3.4815184  | -20.7477999 |
| C  | -1.2668010 | 2.8254408  | -20.7852320 |
| C  | -2.5386225 | 3.5122541  | -20.7511749 |
| C  | -3.5122541 | 2.5386225  | -20.7511749 |
| C  | -2.8254408 | 1.2668010  | -20.7852320 |
| N  | -1.4610322 | 1.4610322  | -20.8176035 |
| C  | -3.4815184 | 0.0000000  | -20.7477999 |
| C  | -2.8254408 | -1.2668010 | -20.7852320 |
| C  | -3.5122541 | -2.5386225 | -20.7511749 |
| C  | -2.5386225 | -3.5122541 | -20.7511749 |
| C  | -1.2668010 | -2.8254408 | -20.7852320 |
| N  | -1.4610322 | -1.4610322 | -20.8176035 |
| C  | 0.0000000  | -3.4815184 | -20.7477999 |
| C  | 1.2668010  | -2.8254408 | -20.7852320 |
| C  | 2.5386225  | -3.5122541 | -20.7511749 |
| C  | 3.5122541  | -2.5386225 | -20.7511749 |
| C  | 2.8254408  | -1.2668010 | -20.7852320 |
| N  | 1.4610322  | -1.4610322 | -20.8176035 |
| C  | 3.4815184  | 0.0000000  | -20.7477999 |
| H  | 2.6636871  | 4.5998289  | -20.7268269 |
| H  | 4.5998289  | 2.6636871  | -20.7268269 |
| H  | -2.6636871 | 4.5998289  | -20.7268269 |
| H  | -4.5998289 | 2.6636871  | -20.7268269 |
| H  | -4.5998289 | -2.6636871 | -20.7268269 |
| H  | -2.6636871 | -4.5998289 | -20.7268269 |
| H  | 2.6636871  | -4.5998289 | -20.7268269 |
| H  | 4.5998289  | -2.6636871 | -20.7268269 |
| Zn | 12.8923069 | 0.0000000  | 17.2642734  |
| C  | 15.7531656 | 2.5468342  | 15.2389175  |
| C  | 15.0044677 | 3.5086429  | 15.8794197  |
| C  | 13.9738945 | 2.8104038  | 16.6211488  |
| C  | 15.1863650 | 1.2650749  | 15.6096336  |
| N  | 14.1142421 | 1.4446999  | 16.4478036  |
| C  | 15.6802400 | 0.0000000  | 15.1628393  |
| C  | 15.1863650 | -1.2650749 | 15.6096336  |
| C  | 15.7531656 | -2.5468342 | 15.2389175  |
| C  | 15.0044677 | -3.5086429 | 15.8794197  |
| C  | 13.9738945 | -2.8104038 | 16.6211488  |
| N  | 14.1142421 | -1.4446999 | 16.4478036  |
| C  | 12.9566337 | -3.4309662 | 17.3607824  |
| C  | 11.8832458 | -2.8107660 | 18.0155354  |

|    |             |            |            |
|----|-------------|------------|------------|
| C  | 10.8021992  | -3.5088683 | 18.6820491 |
| C  | 9.9234098   | -2.5471307 | 19.1272204 |
| C  | 10.4838007  | -1.2651896 | 18.7464272 |
| N  | 11.6692784  | -1.4447436 | 18.0786863 |
| C  | 9.8820838   | -0.0000000 | 19.0310907 |
| C  | 10.4838007  | 1.2651896  | 18.7464272 |
| C  | 9.9234098   | 2.5471307  | 19.1272204 |
| C  | 10.8021992  | 3.5088683  | 18.6820491 |
| C  | 11.8832458  | 2.8107660  | 18.0155354 |
| N  | 11.6692784  | 1.4447436  | 18.0786863 |
| C  | 12.9566337  | 3.4309662  | 17.3607824 |
| H  | 16.6165348  | 2.6817353  | 14.5785768 |
| H  | 15.1301759  | 4.5974141  | 15.8463471 |
| H  | 16.6165348  | -2.6817353 | 14.5785768 |
| H  | 15.1301759  | -4.5974141 | 15.8463471 |
| H  | 10.7231620  | -4.5976301 | 18.7853229 |
| H  | 8.9820314   | -2.6820879 | 19.6705886 |
| H  | 8.9820314   | 2.6820879  | 19.6705886 |
| H  | 10.7231620  | 4.5976301  | 18.7853229 |
| Zn | -12.8923069 | 0.0000000  | 17.2642734 |
| C  | -10.8021992 | -3.5088683 | 18.6820491 |
| C  | -9.9234098  | -2.5471307 | 19.1272204 |
| C  | -10.4838007 | -1.2651896 | 18.7464272 |
| C  | -11.8832458 | -2.8107660 | 18.0155354 |
| N  | -11.6692784 | -1.4447436 | 18.0786863 |
| C  | -12.9566337 | -3.4309662 | 17.3607824 |
| C  | -13.9738945 | -2.8104038 | 16.6211488 |
| C  | -15.0044677 | -3.5086429 | 15.8794197 |
| C  | -15.7531656 | -2.5468342 | 15.2389175 |
| C  | -15.1863650 | -1.2650749 | 15.6096336 |
| N  | -14.1142421 | -1.4446999 | 16.4478036 |
| C  | -15.6802400 | 0.0000000  | 15.1628393 |
| C  | -15.1863650 | 1.2650749  | 15.6096336 |
| C  | -15.7531656 | 2.5468342  | 15.2389175 |
| C  | -15.0044677 | 3.5086429  | 15.8794197 |
| C  | -13.9738945 | 2.8104038  | 16.6211488 |
| N  | -14.1142421 | 1.4446999  | 16.4478036 |
| C  | -12.9566337 | 3.4309662  | 17.3607824 |
| C  | -11.8832458 | 2.8107660  | 18.0155354 |
| C  | -10.8021992 | 3.5088683  | 18.6820491 |
| C  | -9.9234098  | 2.5471307  | 19.1272204 |
| C  | -10.4838007 | 1.2651896  | 18.7464272 |
| N  | -11.6692784 | 1.4447436  | 18.0786863 |
| C  | -9.8820838  | 0.0000000  | 19.0310907 |
| H  | -10.7231620 | -4.5976301 | 18.7853229 |
| H  | -8.9820314  | -2.6820879 | 19.6705886 |
| H  | -15.1301759 | -4.5974141 | 15.8463471 |
| H  | -16.6165348 | -2.6817353 | 14.5785768 |
| H  | -16.6165348 | 2.6817353  | 14.5785768 |

|    |             |            |             |
|----|-------------|------------|-------------|
| H  | -15.1301759 | 4.5974141  | 15.8463471  |
| H  | -10.7231620 | 4.5976301  | 18.7853229  |
| H  | -8.9820314  | 2.6820879  | 19.6705886  |
| Zn | -12.8923069 | 0.0000000  | -17.2642734 |
| C  | -10.8021992 | 3.5088683  | -18.6820491 |
| C  | -9.9234098  | 2.5471307  | -19.1272204 |
| C  | -10.4838007 | 1.2651896  | -18.7464272 |
| C  | -11.8832458 | 2.8107660  | -18.0155354 |
| N  | -11.6692784 | 1.4447436  | -18.0786863 |
| C  | -12.9566337 | 3.4309662  | -17.3607824 |
| C  | -13.9738945 | 2.8104038  | -16.6211488 |
| C  | -15.0044677 | 3.5086429  | -15.8794197 |
| C  | -15.7531656 | 2.5468342  | -15.2389175 |
| C  | -15.1863650 | 1.2650749  | -15.6096336 |
| N  | -14.1142421 | 1.4446999  | -16.4478036 |
| C  | -15.6802400 | 0.0000000  | -15.1628393 |
| C  | -15.1863650 | -1.2650749 | -15.6096336 |
| C  | -15.7531656 | -2.5468342 | -15.2389175 |
| C  | -15.0044677 | -3.5086429 | -15.8794197 |
| C  | -13.9738945 | -2.8104038 | -16.6211488 |
| N  | -14.1142421 | -1.4446999 | -16.4478036 |
| C  | -12.9566337 | -3.4309662 | -17.3607824 |
| C  | -11.8832458 | -2.8107660 | -18.0155354 |
| C  | -10.8021992 | -3.5088683 | -18.6820491 |
| C  | -9.9234098  | -2.5471307 | -19.1272204 |
| C  | -10.4838007 | -1.2651896 | -18.7464272 |
| N  | -11.6692784 | -1.4447436 | -18.0786863 |
| C  | -9.8820838  | 0.0000000  | -19.0310907 |
| H  | -10.7231620 | 4.5976301  | -18.7853229 |
| H  | -8.9820314  | 2.6820879  | -19.6705886 |
| H  | -15.1301759 | 4.5974141  | -15.8463471 |
| H  | -16.6165348 | 2.6817353  | -14.5785768 |
| H  | -16.6165348 | -2.6817353 | -14.5785768 |
| H  | -15.1301759 | -4.5974141 | -15.8463471 |
| H  | -10.7231620 | -4.5976301 | -18.7853229 |
| H  | -8.9820314  | -2.6820879 | -19.6705886 |
| Zn | 12.8923069  | 0.0000000  | -17.2642734 |
| C  | 15.7531656  | -2.5468342 | -15.2389175 |
| C  | 15.0044677  | -3.5086429 | -15.8794197 |
| C  | 13.9738945  | -2.8104038 | -16.6211488 |
| C  | 15.1863650  | -1.2650749 | -15.6096336 |
| N  | 14.1142421  | -1.4446999 | -16.4478036 |
| C  | 15.6802400  | 0.0000000  | -15.1628393 |
| C  | 15.1863650  | 1.2650749  | -15.6096336 |
| C  | 15.7531656  | 2.5468342  | -15.2389175 |
| C  | 15.0044677  | 3.5086429  | -15.8794197 |
| C  | 13.9738945  | 2.8104038  | -16.6211488 |
| N  | 14.1142421  | 1.4446999  | -16.4478036 |
| C  | 12.9566337  | 3.4309662  | -17.3607824 |

|    |            |            |             |
|----|------------|------------|-------------|
| C  | 11.8832458 | 2.8107660  | -18.0155354 |
| C  | 10.8021992 | 3.5088683  | -18.6820491 |
| C  | 9.9234098  | 2.5471307  | -19.1272204 |
| C  | 10.4838007 | 1.2651896  | -18.7464272 |
| N  | 11.6692784 | 1.4447436  | -18.0786863 |
| C  | 9.8820838  | -0.0000000 | -19.0310907 |
| C  | 10.4838007 | -1.2651896 | -18.7464272 |
| C  | 9.9234098  | -2.5471307 | -19.1272204 |
| C  | 10.8021992 | -3.5088683 | -18.6820491 |
| C  | 11.8832458 | -2.8107660 | -18.0155354 |
| N  | 11.6692784 | -1.4447436 | -18.0786863 |
| C  | 12.9566337 | -3.4309662 | -17.3607824 |
| H  | 16.6165348 | -2.6817353 | -14.5785768 |
| H  | 15.1301759 | -4.5974141 | -15.8463471 |
| H  | 16.6165348 | 2.6817353  | -14.5785768 |
| H  | 15.1301759 | 4.5974141  | -15.8463471 |
| H  | 10.7231620 | 4.5976301  | -18.7853229 |
| H  | 8.9820314  | 2.6820879  | -19.6705886 |
| H  | 8.9820314  | -2.6820879 | -19.6705886 |
| H  | 10.7231620 | -4.5976301 | -18.7853229 |
| Zn | 21.0335620 | -0.0000000 | 6.6757291   |
| C  | 21.8685961 | -3.5086718 | 4.2921375   |
| C  | 22.0739051 | -2.5468820 | 3.3285095   |
| C  | 21.8494017 | -1.2650417 | 3.9674574   |
| C  | 21.5012378 | -2.8104394 | 5.5076308   |
| N  | 21.5075976 | -1.4445935 | 5.2846572   |
| C  | 21.1428780 | -3.4308511 | 6.7130646   |
| C  | 20.6885014 | -2.8105056 | 7.8856194   |
| C  | 20.2355325 | -3.5087095 | 9.0719043   |
| C  | 19.8086329 | -2.5469383 | 9.9598405   |
| C  | 20.0218633 | -1.2650680 | 9.3170121   |
| N  | 20.5570217 | -1.4446155 | 8.0658981   |
| C  | 19.7170696 | 0.0000000  | 9.9091393   |
| C  | 20.0218633 | 1.2650680  | 9.3170121   |
| C  | 19.8086329 | 2.5469383  | 9.9598405   |
| C  | 20.2355325 | 3.5087095  | 9.0719043   |
| C  | 20.6885014 | 2.8105056  | 7.8856194   |
| N  | 20.5570217 | 1.4446155  | 8.0658981   |
| C  | 21.1428780 | 3.4308511  | 6.7130646   |
| C  | 21.5012378 | 2.8104394  | 5.5076308   |
| C  | 21.8685961 | 3.5086718  | 4.2921375   |
| C  | 22.0739051 | 2.5468820  | 3.3285095   |
| C  | 21.8494017 | 1.2650417  | 3.9674574   |
| N  | 21.5075976 | 1.4445935  | 5.2846572   |
| C  | 21.9699843 | 0.0000000  | 3.3124250   |
| H  | 21.9481188 | -4.5974614 | 4.1894338   |
| H  | 22.3580501 | -2.6817671 | 2.2793476   |
| H  | 20.2355975 | -4.5974981 | 9.2017873   |
| H  | 19.3917033 | -2.6818312 | 10.9636422  |

|    |             |            |            |
|----|-------------|------------|------------|
| H  | 19.3917033  | 2.6818312  | 10.9636422 |
| H  | 20.2355975  | 4.5974981  | 9.2017873  |
| H  | 21.9481188  | 4.5974614  | 4.1894338  |
| H  | 22.3580501  | 2.6817671  | 2.2793476  |
| Zn | -21.0335620 | 0.0000000  | 6.6757291  |
| C  | -21.8685961 | 3.5086718  | 4.2921375  |
| C  | -22.0739051 | 2.5468820  | 3.3285095  |
| C  | -21.8494017 | 1.2650417  | 3.9674574  |
| C  | -21.5012378 | 2.8104394  | 5.5076308  |
| N  | -21.5075976 | 1.4445935  | 5.2846572  |
| C  | -21.1428780 | 3.4308511  | 6.7130646  |
| C  | -20.6885014 | 2.8105056  | 7.8856194  |
| C  | -20.2355325 | 3.5087095  | 9.0719043  |
| C  | -19.8086329 | 2.5469383  | 9.9598405  |
| C  | -20.0218633 | 1.2650680  | 9.3170121  |
| N  | -20.5570217 | 1.4446155  | 8.0658981  |
| C  | -19.7170696 | 0.0000000  | 9.9091393  |
| C  | -20.0218633 | -1.2650680 | 9.3170121  |
| C  | -19.8086329 | -2.5469383 | 9.9598405  |
| C  | -20.2355325 | -3.5087095 | 9.0719043  |
| C  | -20.6885014 | -2.8105056 | 7.8856194  |
| N  | -20.5570217 | -1.4446155 | 8.0658981  |
| C  | -21.1428780 | -3.4308511 | 6.7130646  |
| C  | -21.5012378 | -2.8104394 | 5.5076308  |
| C  | -21.8685961 | -3.5086718 | 4.2921375  |
| C  | -22.0739051 | -2.5468820 | 3.3285095  |
| C  | -21.8494017 | -1.2650417 | 3.9674574  |
| N  | -21.5075976 | -1.4445935 | 5.2846572  |
| C  | -21.9699843 | -0.0000000 | 3.3124250  |
| H  | -21.9481188 | 4.5974614  | 4.1894338  |
| H  | -22.3580501 | 2.6817671  | 2.2793476  |
| H  | -20.2355975 | 4.5974981  | 9.2017873  |
| H  | -19.3917033 | 2.6818312  | 10.9636422 |
| H  | -19.3917033 | -2.6818312 | 10.9636422 |
| H  | -20.2355975 | -4.5974981 | 9.2017873  |
| H  | -21.9481188 | -4.5974614 | 4.1894338  |
| H  | -22.3580501 | -2.6817671 | 2.2793476  |
| Zn | -21.0335620 | 0.0000000  | -6.6757291 |
| C  | -22.0739051 | 2.5468820  | -3.3285095 |
| C  | -21.8685961 | 3.5086718  | -4.2921375 |
| C  | -21.5012378 | 2.8104394  | -5.5076308 |
| C  | -21.8494017 | 1.2650417  | -3.9674574 |
| N  | -21.5075976 | 1.4445935  | -5.2846572 |
| C  | -21.9699843 | -0.0000000 | -3.3124250 |
| C  | -21.8494017 | -1.2650417 | -3.9674574 |
| C  | -22.0739051 | -2.5468820 | -3.3285095 |
| C  | -21.8685961 | -3.5086718 | -4.2921375 |
| C  | -21.5012378 | -2.8104394 | -5.5076308 |
| N  | -21.5075976 | -1.4445935 | -5.2846572 |

|    |             |            |             |
|----|-------------|------------|-------------|
| C  | -21.1428780 | -3.4308511 | -6.7130646  |
| C  | -20.6885014 | -2.8105056 | -7.8856194  |
| C  | -20.2355325 | -3.5087095 | -9.0719043  |
| C  | -19.8086329 | -2.5469383 | -9.9598405  |
| C  | -20.0218633 | -1.2650680 | -9.3170121  |
| N  | -20.5570217 | -1.4446155 | -8.0658981  |
| C  | -19.7170696 | 0.0000000  | -9.9091393  |
| C  | -20.0218633 | 1.2650680  | -9.3170121  |
| C  | -19.8086329 | 2.5469383  | -9.9598405  |
| C  | -20.2355325 | 3.5087095  | -9.0719043  |
| C  | -20.6885014 | 2.8105056  | -7.8856194  |
| N  | -20.5570217 | 1.4446155  | -8.0658981  |
| C  | -21.1428780 | 3.4308511  | -6.7130646  |
| H  | -22.3580501 | 2.6817671  | -2.2793476  |
| H  | -21.9481188 | 4.5974614  | -4.1894338  |
| H  | -22.3580501 | -2.6817671 | -2.2793476  |
| H  | -21.9481188 | -4.5974614 | -4.1894338  |
| H  | -20.2355975 | -4.5974981 | -9.2017873  |
| H  | -19.3917033 | -2.6818312 | -10.9636422 |
| H  | -19.3917033 | 2.6818312  | -10.9636422 |
| H  | -20.2355975 | 4.5974981  | -9.2017873  |
| Zn | 21.0335620  | -0.0000000 | -6.6757291  |
| C  | 22.0739051  | -2.5468820 | -3.3285095  |
| C  | 21.8685961  | -3.5086718 | -4.2921375  |
| C  | 21.5012378  | -2.8104394 | -5.5076308  |
| C  | 21.8494017  | -1.2650417 | -3.9674574  |
| N  | 21.5075976  | -1.4445935 | -5.2846572  |
| C  | 21.9699843  | -0.0000000 | -3.3124250  |
| C  | 21.8494017  | 1.2650417  | -3.9674574  |
| C  | 22.0739051  | 2.5468820  | -3.3285095  |
| C  | 21.8685961  | 3.5086718  | -4.2921375  |
| C  | 21.5012378  | 2.8104394  | -5.5076308  |
| N  | 21.5075976  | 1.4445935  | -5.2846572  |
| C  | 21.1428780  | 3.4308511  | -6.7130646  |
| C  | 20.6885014  | 2.8105056  | -7.8856194  |
| C  | 20.2355325  | 3.5087095  | -9.0719043  |
| C  | 19.8086329  | 2.5469383  | -9.9598405  |
| C  | 20.0218633  | 1.2650680  | -9.3170121  |
| N  | 20.5570217  | 1.4446155  | -8.0658981  |
| C  | 19.7170696  | 0.0000000  | -9.9091393  |
| C  | 20.0218633  | -1.2650680 | -9.3170121  |
| C  | 19.8086329  | -2.5469383 | -9.9598405  |
| C  | 20.2355325  | -3.5087095 | -9.0719043  |
| C  | 20.6885014  | -2.8105056 | -7.8856194  |
| N  | 20.5570217  | -1.4446155 | -8.0658981  |
| C  | 21.1428780  | -3.4308511 | -6.7130646  |
| H  | 22.3580501  | -2.6817671 | -2.2793476  |
| H  | 21.9481188  | -4.5974614 | -4.1894338  |
| H  | 22.3580501  | 2.6817671  | -2.2793476  |

|    |            |             |             |
|----|------------|-------------|-------------|
| H  | 21.9481188 | 4.5974614   | -4.1894338  |
| H  | 20.2355975 | 4.5974981   | -9.2017873  |
| H  | 19.3917033 | 2.6818312   | -10.9636422 |
| H  | 19.3917033 | -2.6818312  | -10.9636422 |
| H  | 20.2355975 | -4.5974981  | -9.2017873  |
| Zn | 0.0000000  | 12.8923069  | 17.2642734  |
| C  | 2.5471307  | 9.9234098   | 19.1272204  |
| C  | 3.5088683  | 10.8021992  | 18.6820491  |
| C  | 2.8107660  | 11.8832458  | 18.0155354  |
| C  | 1.2651896  | 10.4838007  | 18.7464272  |
| N  | 1.4447436  | 11.6692784  | 18.0786863  |
| C  | 0.0000000  | 9.8820838   | 19.0310907  |
| C  | -1.2651896 | 10.4838007  | 18.7464272  |
| C  | -2.5471307 | 9.9234098   | 19.1272204  |
| C  | -3.5088683 | 10.8021992  | 18.6820491  |
| C  | -2.8107660 | 11.8832458  | 18.0155354  |
| N  | -1.4447436 | 11.6692784  | 18.0786863  |
| C  | -3.4309662 | 12.9566337  | 17.3607824  |
| C  | -2.8104038 | 13.9738945  | 16.6211488  |
| C  | -3.5086429 | 15.0044677  | 15.8794197  |
| C  | -2.5468342 | 15.7531656  | 15.2389175  |
| C  | -1.2650749 | 15.1863650  | 15.6096336  |
| N  | -1.4446999 | 14.1142421  | 16.4478036  |
| C  | 0.0000000  | 15.6802400  | 15.1628393  |
| C  | 1.2650749  | 15.1863650  | 15.6096336  |
| C  | 2.5468342  | 15.7531656  | 15.2389175  |
| C  | 3.5086429  | 15.0044677  | 15.8794197  |
| C  | 2.8104038  | 13.9738945  | 16.6211488  |
| N  | 1.4446999  | 14.1142421  | 16.4478036  |
| C  | 3.4309662  | 12.9566337  | 17.3607824  |
| H  | 2.6820879  | 8.9820314   | 19.6705886  |
| H  | 4.5976301  | 10.7231620  | 18.7853229  |
| H  | -2.6820879 | 8.9820314   | 19.6705886  |
| H  | -4.5976301 | 10.7231620  | 18.7853229  |
| H  | -4.5974141 | 15.1301759  | 15.8463471  |
| H  | -2.6817353 | 16.6165348  | 14.5785768  |
| H  | 2.6817353  | 16.6165348  | 14.5785768  |
| H  | 4.5974141  | 15.1301759  | 15.8463471  |
| Zn | -0.0000000 | -12.8923069 | 17.2642734  |
| C  | 3.5088683  | -10.8021992 | 18.6820491  |
| C  | 2.5471307  | -9.9234098  | 19.1272204  |
| C  | 1.2651896  | -10.4838007 | 18.7464272  |
| C  | 2.8107660  | -11.8832458 | 18.0155354  |
| N  | 1.4447436  | -11.6692784 | 18.0786863  |
| C  | 3.4309662  | -12.9566337 | 17.3607824  |
| C  | 2.8104038  | -13.9738945 | 16.6211488  |
| C  | 3.5086429  | -15.0044677 | 15.8794197  |
| C  | 2.5468342  | -15.7531656 | 15.2389175  |
| C  | 1.2650749  | -15.1863650 | 15.6096336  |



|    |            |             |             |
|----|------------|-------------|-------------|
| N  | 1.4446999  | -14.1142421 | 16.4478036  |
| C  | 0.0000000  | -15.6802400 | 15.1628393  |
| C  | -1.2650749 | -15.1863650 | 15.6096336  |
| C  | -2.5468342 | -15.7531656 | 15.2389175  |
| C  | -3.5086429 | -15.0044677 | 15.8794197  |
| C  | -2.8104038 | -13.9738945 | 16.6211488  |
| N  | -1.4446999 | -14.1142421 | 16.4478036  |
| C  | -3.4309662 | -12.9566337 | 17.3607824  |
| C  | -2.8107660 | -11.8832458 | 18.0155354  |
| C  | -3.5088683 | -10.8021992 | 18.6820491  |
| C  | -2.5471307 | -9.9234098  | 19.1272204  |
| C  | -1.2651896 | -10.4838007 | 18.7464272  |
| N  | -1.4447436 | -11.6692784 | 18.0786863  |
| C  | -0.0000000 | -9.8820838  | 19.0310907  |
| H  | 4.5976301  | -10.7231620 | 18.7853229  |
| H  | 2.6820879  | -8.9820314  | 19.6705886  |
| H  | 4.5974141  | -15.1301759 | 15.8463471  |
| H  | 2.6817353  | -16.6165348 | 14.5785768  |
| H  | -2.6817353 | -16.6165348 | 14.5785768  |
| H  | -4.5974141 | -15.1301759 | 15.8463471  |
| H  | -4.5976301 | -10.7231620 | 18.7853229  |
| H  | -2.6820879 | -8.9820314  | 19.6705886  |
| Zn | -0.0000000 | -12.8923069 | -17.2642734 |
| C  | 2.5471307  | -9.9234098  | -19.1272204 |
| C  | 3.5088683  | -10.8021992 | -18.6820491 |
| C  | 2.8107660  | -11.8832458 | -18.0155354 |
| C  | 1.2651896  | -10.4838007 | -18.7464272 |
| N  | 1.4447436  | -11.6692784 | -18.0786863 |
| C  | -0.0000000 | -9.8820838  | -19.0310907 |
| C  | -1.2651896 | -10.4838007 | -18.7464272 |
| C  | -2.5471307 | -9.9234098  | -19.1272204 |
| C  | -3.5088683 | -10.8021992 | -18.6820491 |
| C  | -2.8107660 | -11.8832458 | -18.0155354 |
| N  | -1.4447436 | -11.6692784 | -18.0786863 |
| C  | -3.4309662 | -12.9566337 | -17.3607824 |
| C  | -2.8104038 | -13.9738945 | -16.6211488 |
| C  | -3.5086429 | -15.0044677 | -15.8794197 |
| C  | -2.5468342 | -15.7531656 | -15.2389175 |
| C  | -1.2650749 | -15.1863650 | -15.6096336 |
| N  | -1.4446999 | -14.1142421 | -16.4478036 |
| C  | 0.0000000  | -15.6802400 | -15.1628393 |
| C  | 1.2650749  | -15.1863650 | -15.6096336 |
| C  | 2.5468342  | -15.7531656 | -15.2389175 |
| C  | 3.5086429  | -15.0044677 | -15.8794197 |
| C  | 2.8104038  | -13.9738945 | -16.6211488 |
| N  | 1.4446999  | -14.1142421 | -16.4478036 |
| C  | 3.4309662  | -12.9566337 | -17.3607824 |
| H  | 2.6820879  | -8.9820314  | -19.6705886 |
| H  | 4.5976301  | -10.7231620 | -18.7853229 |

|    |            |             |             |
|----|------------|-------------|-------------|
| H  | -2.6820879 | -8.9820314  | -19.6705886 |
| H  | -4.5976301 | -10.7231620 | -18.7853229 |
| H  | -4.5974141 | -15.1301759 | -15.8463471 |
| H  | -2.6817353 | -16.6165348 | -14.5785768 |
| H  | 2.6817353  | -16.6165348 | -14.5785768 |
| H  | 4.5974141  | -15.1301759 | -15.8463471 |
| Zn | 0.0000000  | 12.8923069  | -17.2642734 |
| C  | 3.5088683  | 10.8021992  | -18.6820491 |
| C  | 2.5471307  | 9.9234098   | -19.1272204 |
| C  | 1.2651896  | 10.4838007  | -18.7464272 |
| C  | 2.8107660  | 11.8832458  | -18.0155354 |
| N  | 1.4447436  | 11.6692784  | -18.0786863 |
| C  | 3.4309662  | 12.9566337  | -17.3607824 |
| C  | 2.8104038  | 13.9738945  | -16.6211488 |
| C  | 3.5086429  | 15.0044677  | -15.8794197 |
| C  | 2.5468342  | 15.7531656  | -15.2389175 |
| C  | 1.2650749  | 15.1863650  | -15.6096336 |
| N  | 1.4446999  | 14.1142421  | -16.4478036 |
| C  | 0.0000000  | 15.6802400  | -15.1628393 |
| C  | -1.2650749 | 15.1863650  | -15.6096336 |
| C  | -2.5468342 | 15.7531656  | -15.2389175 |
| C  | -3.5086429 | 15.0044677  | -15.8794197 |
| C  | -2.8104038 | 13.9738945  | -16.6211488 |
| N  | -1.4446999 | 14.1142421  | -16.4478036 |
| C  | -3.4309662 | 12.9566337  | -17.3607824 |
| C  | -2.8107660 | 11.8832458  | -18.0155354 |
| C  | -3.5088683 | 10.8021992  | -18.6820491 |
| C  | -2.5471307 | 9.9234098   | -19.1272204 |
| C  | -1.2651896 | 10.4838007  | -18.7464272 |
| N  | -1.4447436 | 11.6692784  | -18.0786863 |
| C  | 0.0000000  | 9.8820838   | -19.0310907 |
| H  | 4.5976301  | 10.7231620  | -18.7853229 |
| H  | 2.6820879  | 8.9820314   | -19.6705886 |
| H  | 4.5974141  | 15.1301759  | -15.8463471 |
| H  | 2.6817353  | 16.6165348  | -14.5785768 |
| H  | -2.6817353 | 16.6165348  | -14.5785768 |
| H  | -4.5974141 | 15.1301759  | -15.8463471 |
| H  | -4.5976301 | 10.7231620  | -18.7853229 |
| H  | -2.6820879 | 8.9820314   | -19.6705886 |
| Zn | 0.0000000  | 21.0335620  | 6.6757291   |
| C  | 3.5086718  | 21.8685961  | 4.2921375   |
| C  | 2.5468820  | 22.0739051  | 3.3285095   |
| C  | 1.2650417  | 21.8494017  | 3.9674574   |
| C  | 2.8104394  | 21.5012378  | 5.5076308   |
| N  | 1.4445935  | 21.5075976  | 5.2846572   |
| C  | 3.4308511  | 21.1428780  | 6.7130646   |
| C  | 2.8105056  | 20.6885014  | 7.8856194   |
| C  | 3.5087095  | 20.2355325  | 9.0719043   |
| C  | 2.5469383  | 19.8086329  | 9.9598405   |

|    |            |             |            |
|----|------------|-------------|------------|
| C  | 1.2650680  | 20.0218633  | 9.3170121  |
| N  | 1.4446155  | 20.5570217  | 8.0658981  |
| C  | 0.0000000  | 19.7170696  | 9.9091393  |
| C  | -1.2650680 | 20.0218633  | 9.3170121  |
| C  | -2.5469383 | 19.8086329  | 9.9598405  |
| C  | -3.5087095 | 20.2355325  | 9.0719043  |
| C  | -2.8105056 | 20.6885014  | 7.8856194  |
| N  | -1.4446155 | 20.5570217  | 8.0658981  |
| C  | -3.4308511 | 21.1428780  | 6.7130646  |
| C  | -2.8104394 | 21.5012378  | 5.5076308  |
| C  | -3.5086718 | 21.8685961  | 4.2921375  |
| C  | -2.5468820 | 22.0739051  | 3.3285095  |
| C  | -1.2650417 | 21.8494017  | 3.9674574  |
| N  | -1.4445935 | 21.5075976  | 5.2846572  |
| C  | -0.0000000 | 21.9699843  | 3.3124250  |
| H  | 4.5974614  | 21.9481188  | 4.1894338  |
| H  | 2.6817671  | 22.3580501  | 2.2793476  |
| H  | 4.5974981  | 20.2355975  | 9.2017873  |
| H  | 2.6818312  | 19.3917033  | 10.9636422 |
| H  | -2.6818312 | 19.3917033  | 10.9636422 |
| H  | -4.5974981 | 20.2355975  | 9.2017873  |
| H  | -4.5974614 | 21.9481188  | 4.1894338  |
| H  | -2.6817671 | 22.3580501  | 2.2793476  |
| Zn | -0.0000000 | -21.0335620 | 6.6757291  |
| C  | 2.5468820  | -22.0739051 | 3.3285095  |
| C  | 3.5086718  | -21.8685961 | 4.2921375  |
| C  | 2.8104394  | -21.5012378 | 5.5076308  |
| C  | 1.2650417  | -21.8494017 | 3.9674574  |
| N  | 1.4445935  | -21.5075976 | 5.2846572  |
| C  | 0.0000000  | -21.9699843 | 3.3124250  |
| C  | -1.2650417 | -21.8494017 | 3.9674574  |
| C  | -2.5468820 | -22.0739051 | 3.3285095  |
| C  | -3.5086718 | -21.8685961 | 4.2921375  |
| C  | -2.8104394 | -21.5012378 | 5.5076308  |
| N  | -1.4445935 | -21.5075976 | 5.2846572  |
| C  | -3.4308511 | -21.1428780 | 6.7130646  |
| C  | -2.8105056 | -20.6885014 | 7.8856194  |
| C  | -3.5087095 | -20.2355325 | 9.0719043  |
| C  | -2.5469383 | -19.8086329 | 9.9598405  |
| C  | -1.2650680 | -20.0218633 | 9.3170121  |
| N  | -1.4446155 | -20.5570217 | 8.0658981  |
| C  | 0.0000000  | -19.7170696 | 9.9091393  |
| C  | 1.2650680  | -20.0218633 | 9.3170121  |
| C  | 2.5469383  | -19.8086329 | 9.9598405  |
| C  | 3.5087095  | -20.2355325 | 9.0719043  |
| C  | 2.8105056  | -20.6885014 | 7.8856194  |
| N  | 1.4446155  | -20.5570217 | 8.0658981  |
| C  | 3.4308511  | -21.1428780 | 6.7130646  |
| H  | 2.6817671  | -22.3580501 | 2.2793476  |

|    |            |             |             |
|----|------------|-------------|-------------|
| H  | 4.5974614  | -21.9481188 | 4.1894338   |
| H  | -2.6817671 | -22.3580501 | 2.2793476   |
| H  | -4.5974614 | -21.9481188 | 4.1894338   |
| H  | -4.5974981 | -20.2355975 | 9.2017873   |
| H  | -2.6818312 | -19.3917033 | 10.9636422  |
| H  | 2.6818312  | -19.3917033 | 10.9636422  |
| H  | 4.5974981  | -20.2355975 | 9.2017873   |
| Zn | -0.0000000 | -21.0335620 | -6.6757291  |
| C  | 3.5086718  | -21.8685961 | -4.2921375  |
| C  | 2.5468820  | -22.0739051 | -3.3285095  |
| C  | 1.2650417  | -21.8494017 | -3.9674574  |
| C  | 2.8104394  | -21.5012378 | -5.5076308  |
| N  | 1.4445935  | -21.5075976 | -5.2846572  |
| C  | 3.4308511  | -21.1428780 | -6.7130646  |
| C  | 2.8105056  | -20.6885014 | -7.8856194  |
| C  | 3.5087095  | -20.2355325 | -9.0719043  |
| C  | 2.5469383  | -19.8086329 | -9.9598405  |
| C  | 1.2650680  | -20.0218633 | -9.3170121  |
| N  | 1.4446155  | -20.5570217 | -8.0658981  |
| C  | 0.0000000  | -19.7170696 | -9.9091393  |
| C  | -1.2650680 | -20.0218633 | -9.3170121  |
| C  | -2.5469383 | -19.8086329 | -9.9598405  |
| C  | -3.5087095 | -20.2355325 | -9.0719043  |
| C  | -2.8105056 | -20.6885014 | -7.8856194  |
| N  | -1.4446155 | -20.5570217 | -8.0658981  |
| C  | -3.4308511 | -21.1428780 | -6.7130646  |
| C  | -2.8104394 | -21.5012378 | -5.5076308  |
| C  | -3.5086718 | -21.8685961 | -4.2921375  |
| C  | -2.5468820 | -22.0739051 | -3.3285095  |
| C  | -1.2650417 | -21.8494017 | -3.9674574  |
| N  | -1.4445935 | -21.5075976 | -5.2846572  |
| C  | -0.0000000 | -21.9699843 | -3.3124250  |
| H  | 4.5974614  | -21.9481188 | -4.1894338  |
| H  | 2.6817671  | -22.3580501 | -2.2793476  |
| H  | 4.5974981  | -20.2355975 | -9.2017873  |
| H  | 2.6818312  | -19.3917033 | -10.9636422 |
| H  | -2.6818312 | -19.3917033 | -10.9636422 |
| H  | -4.5974981 | -20.2355975 | -9.2017873  |
| H  | -4.5974614 | -21.9481188 | -4.1894338  |
| H  | -2.6817671 | -22.3580501 | -2.2793476  |
| Zn | 0.0000000  | 21.0335620  | -6.6757291  |
| C  | 2.5468820  | 22.0739051  | -3.3285095  |
| C  | 3.5086718  | 21.8685961  | -4.2921375  |
| C  | 2.8104394  | 21.5012378  | -5.5076308  |
| C  | 1.2650417  | 21.8494017  | -3.9674574  |
| N  | 1.4445935  | 21.5075976  | -5.2846572  |
| C  | -0.0000000 | 21.9699843  | -3.3124250  |
| C  | -1.2650417 | 21.8494017  | -3.9674574  |
| C  | -2.5468820 | 22.0739051  | -3.3285095  |

|   |            |            |             |
|---|------------|------------|-------------|
| C | -3.5086718 | 21.8685961 | -4.2921375  |
| C | -2.8104394 | 21.5012378 | -5.5076308  |
| N | -1.4445935 | 21.5075976 | -5.2846572  |
| C | -3.4308511 | 21.1428780 | -6.7130646  |
| C | -2.8105056 | 20.6885014 | -7.8856194  |
| C | -3.5087095 | 20.2355325 | -9.0719043  |
| C | -2.5469383 | 19.8086329 | -9.9598405  |
| C | -1.2650680 | 20.0218633 | -9.3170121  |
| N | -1.4446155 | 20.5570217 | -8.0658981  |
| C | 0.0000000  | 19.7170696 | -9.9091393  |
| C | 1.2650680  | 20.0218633 | -9.3170121  |
| C | 2.5469383  | 19.8086329 | -9.9598405  |
| C | 3.5087095  | 20.2355325 | -9.0719043  |
| C | 2.8105056  | 20.6885014 | -7.8856194  |
| N | 1.4446155  | 20.5570217 | -8.0658981  |
| C | 3.4308511  | 21.1428780 | -6.7130646  |
| H | 2.6817671  | 22.3580501 | -2.2793476  |
| H | 4.5974614  | 21.9481188 | -4.1894338  |
| H | -2.6817671 | 22.3580501 | -2.2793476  |
| H | -4.5974614 | 21.9481188 | -4.1894338  |
| H | -4.5974981 | 20.2355975 | -9.2017873  |
| H | -2.6818312 | 19.3917033 | -10.9636422 |
| H | 2.6818312  | 19.3917033 | -10.9636422 |
| H | 4.5974981  | 20.2355975 | -9.2017873  |
| C | 0.0000000  | -4.8841025 | 20.5845070  |
| C | 0.0000000  | -6.1039328 | 20.3408399  |
| C | -0.0000000 | -7.4097370 | 19.9926398  |
| C | -0.0000000 | -8.5877307 | 19.5918937  |
| C | -4.8841025 | 0.0000000  | 20.5845070  |
| C | -6.1039328 | 0.0000000  | 20.3408399  |
| C | -7.4097370 | 0.0000000  | 19.9926398  |
| C | -8.5877307 | 0.0000000  | 19.5918937  |
| C | 0.0000000  | 4.8841025  | 20.5845070  |
| C | 0.0000000  | 6.1039328  | 20.3408399  |
| C | 0.0000000  | 7.4097370  | 19.9926398  |
| C | 0.0000000  | 8.5877307  | 19.5918937  |
| C | 4.8841025  | 0.0000000  | 20.5845070  |
| C | 6.1039328  | 0.0000000  | 20.3408399  |
| C | 7.4097370  | -0.0000000 | 19.9926398  |
| C | 8.5877307  | -0.0000000 | 19.5918937  |
| C | 0.0000000  | 4.8841025  | -20.5845070 |
| C | 0.0000000  | 6.1039328  | -20.3408399 |
| C | 0.0000000  | 7.4097370  | -19.9926398 |
| C | 0.0000000  | 8.5877307  | -19.5918937 |
| C | -4.8841025 | 0.0000000  | -20.5845070 |
| C | -6.1039328 | 0.0000000  | -20.3408399 |
| C | -7.4097370 | 0.0000000  | -19.9926398 |
| C | -8.5877307 | 0.0000000  | -19.5918937 |
| C | 0.0000000  | -4.8841025 | -20.5845070 |

|   |             |             |             |
|---|-------------|-------------|-------------|
| C | 0.0000000   | -6.1039328  | -20.3408399 |
| C | -0.0000000  | -7.4097370  | -19.9926398 |
| C | -0.0000000  | -8.5877307  | -19.5918937 |
| C | 4.8841025   | 0.0000000   | -20.5845070 |
| C | 6.1039328   | 0.0000000   | -20.3408399 |
| C | 7.4097370   | -0.0000000  | -19.9926398 |
| C | 8.5877307   | -0.0000000  | -19.5918937 |
| C | 16.6950279  | 0.0000000   | 14.1829854  |
| C | 17.5156460  | -0.0000000  | 13.2475004  |
| C | 18.3390332  | 0.0000000   | 12.1759691  |
| C | 19.0311446  | 0.0000000   | 11.1417629  |
| C | -16.6950279 | 0.0000000   | 14.1829854  |
| C | -17.5156460 | 0.0000000   | 13.2475004  |
| C | -18.3390332 | 0.0000000   | 12.1759691  |
| C | -19.0311446 | -0.0000000  | 11.1417629  |
| C | -16.6950279 | 0.0000000   | -14.1829854 |
| C | -17.5156460 | 0.0000000   | -13.2475004 |
| C | -18.3390332 | 0.0000000   | -12.1759691 |
| C | -19.0311446 | -0.0000000  | -11.1417629 |
| C | 16.6950279  | 0.0000000   | -14.1829854 |
| C | 17.5156460  | -0.0000000  | -13.2475004 |
| C | 18.3390332  | 0.0000000   | -12.1759691 |
| C | 19.0311446  | 0.0000000   | -11.1417629 |
| C | 22.1794545  | 0.0000000   | 1.9174108   |
| C | 22.2613377  | 0.0000000   | 0.6756806   |
| C | 22.2613377  | 0.0000000   | -0.6756806  |
| C | 22.1794545  | 0.0000000   | -1.9174108  |
| C | -22.1794545 | 0.0000000   | 1.9174108   |
| C | -22.2613377 | -0.0000000  | 0.6756806   |
| C | -22.2613377 | -0.0000000  | -0.6756806  |
| C | -22.1794545 | 0.0000000   | -1.9174108  |
| C | -0.0000000  | 16.6950279  | 14.1829854  |
| C | 0.0000000   | 17.5156460  | 13.2475004  |
| C | 0.0000000   | 18.3390332  | 12.1759691  |
| C | -0.0000000  | 19.0311446  | 11.1417629  |
| C | 0.0000000   | -16.6950279 | 14.1829854  |
| C | -0.0000000  | -17.5156460 | 13.2475004  |
| C | 0.0000000   | -18.3390332 | 12.1759691  |
| C | 0.0000000   | -19.0311446 | 11.1417629  |
| C | 0.0000000   | -16.6950279 | -14.1829854 |
| C | -0.0000000  | -17.5156460 | -13.2475004 |
| C | 0.0000000   | -18.3390332 | -12.1759691 |
| C | 0.0000000   | -19.0311446 | -11.1417629 |
| C | -0.0000000  | 16.6950279  | -14.1829854 |
| C | 0.0000000   | 17.5156460  | -13.2475004 |
| C | 0.0000000   | 18.3390332  | -12.1759691 |
| C | -0.0000000  | 19.0311446  | -11.1417629 |
| C | -0.0000000  | 22.1794545  | 1.9174108   |
| C | -0.0000000  | 22.2613377  | 0.6756806   |

|   |             |             |             |
|---|-------------|-------------|-------------|
| C | -0.0000000  | 22.2613377  | -0.6756806  |
| C | 0.0000000   | 22.1794545  | -1.9174108  |
| C | 0.0000000   | -22.1794545 | 1.9174108   |
| C | 0.0000000   | -22.2613377 | 0.6756806   |
| C | 0.0000000   | -22.2613377 | -0.6756806  |
| C | 0.0000000   | -22.1794545 | -1.9174108  |
| H | 12.9815815  | -4.5301061  | 17.3979071  |
| H | 12.9815815  | 4.5301061   | 17.3979071  |
| H | -12.9815815 | -4.5301061  | 17.3979071  |
| H | -12.9815815 | 4.5301061   | 17.3979071  |
| H | -12.9815815 | 4.5301061   | -17.3979071 |
| H | -12.9815815 | -4.5301061  | -17.3979071 |
| H | 12.9815815  | 4.5301061   | -17.3979071 |
| H | 12.9815815  | -4.5301061  | -17.3979071 |
| H | 21.1850558  | -4.5299994  | 6.7274202   |
| H | 21.1850558  | 4.5299994   | 6.7274202   |
| H | -21.1850558 | 4.5299994   | 6.7274202   |
| H | -21.1850558 | -4.5299994  | 6.7274202   |
| H | -21.1850558 | -4.5299994  | -6.7274202  |
| H | -21.1850558 | 4.5299994   | -6.7274202  |
| H | 21.1850558  | 4.5299994   | -6.7274202  |
| H | 21.1850558  | -4.5299994  | -6.7274202  |
| H | -4.5301061  | 12.9815815  | 17.3979071  |
| H | 4.5301061   | 12.9815815  | 17.3979071  |
| H | 4.5301061   | -12.9815815 | 17.3979071  |
| H | -4.5301061  | -12.9815815 | 17.3979071  |
| H | -4.5301061  | -12.9815815 | -17.3979071 |
| H | 4.5301061   | -12.9815815 | -17.3979071 |
| H | 4.5301061   | 12.9815815  | -17.3979071 |
| H | -4.5301061  | 12.9815815  | -17.3979071 |
| H | 4.5299994   | 21.1850558  | 6.7274202   |
| H | -4.5299994  | 21.1850558  | 6.7274202   |
| H | -4.5299994  | -21.1850558 | 6.7274202   |
| H | 4.5299994   | -21.1850558 | 6.7274202   |
| H | 4.5299994   | -21.1850558 | -6.7274202  |
| H | -4.5299994  | -21.1850558 | -6.7274202  |
| H | -4.5299994  | 21.1850558  | -6.7274202  |
| H | 4.5299994   | 21.1850558  | -6.7274202  |

## Molecule 7

1230

Energy =

|    |           |            |            |
|----|-----------|------------|------------|
| Zn | 5.9631137 | 11.8333606 | 16.1813880 |
| C  | 5.2446466 | 15.5838870 | 14.1276982 |
| C  | 3.9521045 | 15.2802935 | 14.4887669 |
| C  | 4.0083706 | 14.0268368 | 15.2104472 |
| C  | 6.0767400 | 14.5223030 | 14.6469481 |
| N  | 5.3109232 | 13.5922668 | 15.3143232 |
| C  | 7.4847441 | 14.4411416 | 14.4502826 |

|    |            |            |            |
|----|------------|------------|------------|
| C  | 8.3368703  | 13.4534725 | 15.0274399 |
| C  | 9.7743488  | 13.4357002 | 14.8837617 |
| C  | 10.2181116 | 12.2949533 | 15.5134236 |
| C  | 9.0444679  | 11.6206842 | 16.0241020 |
| N  | 7.9124049  | 12.3540567 | 15.7427688 |
| C  | 9.0629950  | 10.3318485 | 16.6405911 |
| C  | 7.9189955  | 9.6249179  | 17.1134645 |
| C  | 7.9651027  | 8.3030723  | 17.6981701 |
| C  | 6.6606795  | 7.9333394  | 17.9385531 |
| C  | 5.8302480  | 9.0350283  | 17.5023446 |
| N  | 6.6145497  | 10.0597413 | 17.0164354 |
| C  | 4.4028547  | 9.0330658  | 17.5446267 |
| C  | 3.5703169  | 10.1284097 | 17.1604800 |
| C  | 2.1269605  | 10.1282823 | 17.2568363 |
| C  | 1.6973112  | 11.3341550 | 16.7490113 |
| C  | 2.8815779  | 12.0560670 | 16.3398682 |
| N  | 4.0114675  | 11.3145088 | 16.6131795 |
| C  | 2.8620363  | 13.3192453 | 15.6787945 |
| H  | 5.6096604  | 16.4496883 | 13.5649897 |
| H  | 3.0387681  | 15.8463155 | 14.2806022 |
| H  | 10.3635345 | 14.2003975 | 14.3670063 |
| H  | 11.2461115 | 11.9335775 | 15.6154191 |
| H  | 8.8812730  | 7.7342824  | 17.8910088 |
| H  | 6.2873868  | 6.9996870  | 18.3722124 |
| H  | 1.5251714  | 9.3068371  | 17.6597353 |
| H  | 0.6710425  | 11.7031548 | 16.6467979 |
| Zn | 16.1813880 | 5.9631137  | 11.8333606 |
| C  | 15.5134236 | 10.2181116 | 12.2949533 |
| C  | 14.8837617 | 9.7743488  | 13.4357002 |
| C  | 15.0274399 | 8.3368703  | 13.4534725 |
| C  | 16.0241020 | 9.0444679  | 11.6206842 |
| N  | 15.7427688 | 7.9124049  | 12.3540567 |
| C  | 16.6405911 | 9.0629950  | 10.3318485 |
| C  | 17.1134645 | 7.9189955  | 9.6249179  |
| C  | 17.6981701 | 7.9651027  | 8.3030723  |
| C  | 17.9385531 | 6.6606795  | 7.9333394  |
| C  | 17.5023446 | 5.8302480  | 9.0350283  |
| N  | 17.0164354 | 6.6145497  | 10.0597413 |
| C  | 17.5446267 | 4.4028547  | 9.0330658  |
| C  | 17.1604800 | 3.5703169  | 10.1284097 |
| C  | 17.2568363 | 2.1269605  | 10.1282823 |
| C  | 16.7490113 | 1.6973112  | 11.3341550 |
| C  | 16.3398682 | 2.8815779  | 12.0560670 |
| N  | 16.6131795 | 4.0114675  | 11.3145088 |
| C  | 15.6787945 | 2.8620363  | 13.3192453 |
| C  | 15.2104472 | 4.0083706  | 14.0268368 |
| C  | 14.4887669 | 3.9521045  | 15.2802935 |
| C  | 14.1276982 | 5.2446466  | 15.5838870 |
| C  | 14.6469481 | 6.0767400  | 14.5223030 |



|    |            |            |            |
|----|------------|------------|------------|
| N  | 15.3143232 | 5.3109232  | 13.5922668 |
| C  | 14.4502826 | 7.4847441  | 14.4411416 |
| H  | 15.6154191 | 11.2461115 | 11.9335775 |
| H  | 14.3670063 | 10.3635345 | 14.2003975 |
| H  | 17.8910088 | 8.8812730  | 7.7342824  |
| H  | 18.3722124 | 6.2873868  | 6.9996870  |
| H  | 17.6597353 | 1.5251714  | 9.3068371  |
| H  | 16.6467979 | 0.6710425  | 11.7031548 |
| H  | 14.2806022 | 3.0387681  | 15.8463155 |
| H  | 13.5649897 | 5.6096604  | 16.4496883 |
| Zn | 11.8333606 | 16.1813880 | 5.9631137  |
| C  | 7.9333394  | 17.9385531 | 6.6606795  |
| C  | 8.3030723  | 17.6981701 | 7.9651027  |
| C  | 9.6249179  | 17.1134645 | 7.9189955  |
| C  | 9.0350283  | 17.5023446 | 5.8302480  |
| N  | 10.0597413 | 17.0164354 | 6.6145497  |
| C  | 9.0330658  | 17.5446267 | 4.4028547  |
| C  | 10.1284097 | 17.1604800 | 3.5703169  |
| C  | 10.1282823 | 17.2568363 | 2.1269605  |
| C  | 11.3341550 | 16.7490113 | 1.6973112  |
| C  | 12.0560670 | 16.3398682 | 2.8815779  |
| N  | 11.3145088 | 16.6131795 | 4.0114675  |
| C  | 13.3192453 | 15.6787945 | 2.8620363  |
| C  | 14.0268368 | 15.2104472 | 4.0083706  |
| C  | 15.2802935 | 14.4887669 | 3.9521045  |
| C  | 15.5838870 | 14.1276982 | 5.2446466  |
| C  | 14.5223030 | 14.6469481 | 6.0767400  |
| N  | 13.5922668 | 15.3143232 | 5.3109232  |
| C  | 14.4411416 | 14.4502826 | 7.4847441  |
| C  | 13.4534725 | 15.0274399 | 8.3368703  |
| C  | 13.4357002 | 14.8837617 | 9.7743488  |
| C  | 12.2949533 | 15.5134236 | 10.2181116 |
| C  | 11.6206842 | 16.0241020 | 9.0444679  |
| N  | 12.3540567 | 15.7427688 | 7.9124049  |
| C  | 10.3318485 | 16.6405911 | 9.0629950  |
| H  | 6.9996870  | 18.3722124 | 6.2873868  |
| H  | 7.7342824  | 17.8910088 | 8.8812730  |
| H  | 9.3068371  | 17.6597353 | 1.5251714  |
| H  | 11.7031548 | 16.6467979 | 0.6710425  |
| H  | 15.8463155 | 14.2806022 | 3.0387681  |
| H  | 16.4496883 | 13.5649897 | 5.6096604  |
| H  | 14.2003975 | 14.3670063 | 10.3635345 |
| H  | 11.9335775 | 15.6154191 | 11.2461115 |
| Zn | -5.9631137 | 16.1813880 | 11.8333606 |
| C  | -6.6606795 | 17.9385531 | 7.9333394  |
| C  | -7.9651027 | 17.6981701 | 8.3030723  |
| C  | -7.9189955 | 17.1134645 | 9.6249179  |
| C  | -5.8302480 | 17.5023446 | 9.0350283  |
| N  | -6.6145497 | 17.0164354 | 10.0597413 |

|    |             |            |            |
|----|-------------|------------|------------|
| C  | -4.4028547  | 17.5446267 | 9.0330658  |
| C  | -3.5703169  | 17.1604800 | 10.1284097 |
| C  | -2.1269605  | 17.2568363 | 10.1282823 |
| C  | -1.6973112  | 16.7490113 | 11.3341550 |
| C  | -2.8815779  | 16.3398682 | 12.0560670 |
| N  | -4.0114675  | 16.6131795 | 11.3145088 |
| C  | -2.8620363  | 15.6787945 | 13.3192453 |
| C  | -4.0083706  | 15.2104472 | 14.0268368 |
| C  | -3.9521045  | 14.4887669 | 15.2802935 |
| C  | -5.2446466  | 14.1276982 | 15.5838870 |
| C  | -6.0767400  | 14.6469481 | 14.5223030 |
| N  | -5.3109232  | 15.3143232 | 13.5922668 |
| C  | -7.4847441  | 14.4502826 | 14.4411416 |
| C  | -8.3368703  | 15.0274399 | 13.4534725 |
| C  | -9.7743488  | 14.8837617 | 13.4357002 |
| C  | -10.2181116 | 15.5134236 | 12.2949533 |
| C  | -9.0444679  | 16.0241020 | 11.6206842 |
| N  | -7.9124049  | 15.7427688 | 12.3540567 |
| C  | -9.0629950  | 16.6405911 | 10.3318485 |
| H  | -6.2873868  | 18.3722124 | 6.9996870  |
| H  | -8.8812730  | 17.8910088 | 7.7342824  |
| H  | -1.5251714  | 17.6597353 | 9.3068371  |
| H  | -0.6710425  | 16.6467979 | 11.7031548 |
| H  | -3.0387681  | 14.2806022 | 15.8463155 |
| H  | -5.6096604  | 13.5649897 | 16.4496883 |
| H  | -10.3635345 | 14.3670063 | 14.2003975 |
| H  | -11.2461115 | 15.6154191 | 11.9335775 |
| Zn | -0.0000000  | -0.0000000 | 18.6480069 |
| C  | -0.8025557  | 4.2602430  | 18.6072143 |
| C  | -2.0977995  | 3.7939222  | 18.6078430 |
| C  | -2.0184406  | 2.3497719  | 18.6275052 |
| C  | 0.0567658   | 3.0969989  | 18.6260440 |
| N  | -0.7004169  | 1.9445586  | 18.6446332 |
| C  | 1.4832801   | 3.1534223  | 18.6072508 |
| C  | 2.3497719   | 2.0184406  | 18.6275052 |
| C  | 3.7939222   | 2.0977995  | 18.6078430 |
| C  | 4.2602430   | 0.8025557  | 18.6072143 |
| C  | 3.0969989   | -0.0567658 | 18.6260440 |
| N  | 1.9445586   | 0.7004169  | 18.6446332 |
| C  | 3.1534223   | -1.4832801 | 18.6072508 |
| C  | 2.0184406   | -2.3497719 | 18.6275052 |
| C  | 2.0977995   | -3.7939222 | 18.6078430 |
| C  | 0.8025557   | -4.2602430 | 18.6072143 |
| C  | -0.0567658  | -3.0969989 | 18.6260440 |
| N  | 0.7004169   | -1.9445586 | 18.6446332 |
| C  | -1.4832801  | -3.1534223 | 18.6072508 |
| C  | -2.3497719  | -2.0184406 | 18.6275052 |
| C  | -3.7939222  | -2.0977995 | 18.6078430 |
| C  | -4.2602430  | -0.8025557 | 18.6072143 |

|    |            |             |            |
|----|------------|-------------|------------|
| C  | -3.0969989 | 0.0567658   | 18.6260440 |
| N  | -1.9445586 | -0.7004169  | 18.6446332 |
| C  | -3.1534223 | 1.4832801   | 18.6072508 |
| H  | -0.4535966 | 5.2980831   | 18.5932337 |
| H  | -3.0280515 | 4.3713057   | 18.5936140 |
| H  | 4.3713057  | 3.0280515   | 18.5936140 |
| H  | 5.2980831  | 0.4535966   | 18.5932337 |
| H  | 3.0280515  | -4.3713057  | 18.5936140 |
| H  | 0.4535966  | -5.2980831  | 18.5932337 |
| H  | -4.3713057 | -3.0280515  | 18.5936140 |
| H  | -5.2980831 | -0.4535966  | 18.5932337 |
| Zn | 11.8333606 | -5.9631137  | 16.1813880 |
| C  | 11.3341550 | -1.6973112  | 16.7490113 |
| C  | 10.1282823 | -2.1269605  | 17.2568363 |
| C  | 10.1284097 | -3.5703169  | 17.1604800 |
| C  | 12.0560670 | -2.8815779  | 16.3398682 |
| N  | 11.3145088 | -4.0114675  | 16.6131795 |
| C  | 13.3192453 | -2.8620363  | 15.6787945 |
| C  | 14.0268368 | -4.0083706  | 15.2104472 |
| C  | 15.2802935 | -3.9521045  | 14.4887669 |
| C  | 15.5838870 | -5.2446466  | 14.1276982 |
| C  | 14.5223030 | -6.0767400  | 14.6469481 |
| N  | 13.5922668 | -5.3109232  | 15.3143232 |
| C  | 14.4411416 | -7.4847441  | 14.4502826 |
| C  | 13.4534725 | -8.3368703  | 15.0274399 |
| C  | 13.4357002 | -9.7743488  | 14.8837617 |
| C  | 12.2949533 | -10.2181116 | 15.5134236 |
| C  | 11.6206842 | -9.0444679  | 16.0241020 |
| N  | 12.3540567 | -7.9124049  | 15.7427688 |
| C  | 10.3318485 | -9.0629950  | 16.6405911 |
| C  | 9.6249179  | -7.9189955  | 17.1134645 |
| C  | 8.3030723  | -7.9651027  | 17.6981701 |
| C  | 7.9333394  | -6.6606795  | 17.9385531 |
| C  | 9.0350283  | -5.8302480  | 17.5023446 |
| N  | 10.0597413 | -6.6145497  | 17.0164354 |
| C  | 9.0330658  | -4.4028547  | 17.5446267 |
| H  | 11.7031548 | -0.6710425  | 16.6467979 |
| H  | 9.3068371  | -1.5251714  | 17.6597353 |
| H  | 15.8463155 | -3.0387681  | 14.2806022 |
| H  | 16.4496883 | -5.6096604  | 13.5649897 |
| H  | 14.2003975 | -10.3635345 | 14.3670063 |
| H  | 11.9335775 | -11.2461115 | 15.6154191 |
| H  | 7.7342824  | -8.8812730  | 17.8910088 |
| H  | 6.9996870  | -6.2873868  | 18.3722124 |
| Zn | 18.6480069 | 0.0000000   | 0.0000000  |
| C  | 18.6072143 | 4.2602430   | 0.8025557  |
| C  | 18.6078430 | 3.7939222   | 2.0977995  |
| C  | 18.6275052 | 2.3497719   | 2.0184406  |
| C  | 18.6260440 | 3.0969989   | -0.0567658 |

|    |            |            |             |
|----|------------|------------|-------------|
| N  | 18.6446332 | 1.9445586  | 0.7004169   |
| C  | 18.6072508 | 3.1534223  | -1.4832801  |
| C  | 18.6275052 | 2.0184406  | -2.3497719  |
| C  | 18.6078430 | 2.0977995  | -3.7939222  |
| C  | 18.6072143 | 0.8025557  | -4.2602430  |
| C  | 18.6260440 | -0.0567658 | -3.0969989  |
| N  | 18.6446332 | 0.7004169  | -1.9445586  |
| C  | 18.6072508 | -1.4832801 | -3.1534223  |
| C  | 18.6275052 | -2.3497719 | -2.0184406  |
| C  | 18.6078430 | -3.7939222 | -2.0977995  |
| C  | 18.6072143 | -4.2602430 | -0.8025557  |
| C  | 18.6260440 | -3.0969989 | 0.0567658   |
| N  | 18.6446332 | -1.9445586 | -0.7004169  |
| C  | 18.6072508 | -3.1534223 | 1.4832801   |
| C  | 18.6275052 | -2.0184406 | 2.3497719   |
| C  | 18.6078430 | -2.0977995 | 3.7939222   |
| C  | 18.6072143 | -0.8025557 | 4.2602430   |
| C  | 18.6260440 | 0.0567658  | 3.0969989   |
| N  | 18.6446332 | -0.7004169 | 1.9445586   |
| C  | 18.6072508 | 1.4832801  | 3.1534223   |
| H  | 18.5932337 | 5.2980831  | 0.4535966   |
| H  | 18.5936140 | 4.3713057  | 3.0280515   |
| H  | 18.5936140 | 3.0280515  | -4.3713057  |
| H  | 18.5932337 | 0.4535966  | -5.2980831  |
| H  | 18.5936140 | -4.3713057 | -3.0280515  |
| H  | 18.5932337 | -5.2980831 | -0.4535966  |
| H  | 18.5936140 | -3.0280515 | 4.3713057   |
| H  | 18.5932337 | -0.4535966 | 5.2980831   |
| Zn | 16.1813880 | 11.8333606 | -5.9631137  |
| C  | 14.1276982 | 15.5838870 | -5.2446466  |
| C  | 14.4887669 | 15.2802935 | -3.9521045  |
| C  | 15.2104472 | 14.0268368 | -4.0083706  |
| C  | 14.6469481 | 14.5223030 | -6.0767400  |
| N  | 15.3143232 | 13.5922668 | -5.3109232  |
| C  | 14.4502826 | 14.4411416 | -7.4847441  |
| C  | 15.0274399 | 13.4534725 | -8.3368703  |
| C  | 14.8837617 | 13.4357002 | -9.7743488  |
| C  | 15.5134236 | 12.2949533 | -10.2181116 |
| C  | 16.0241020 | 11.6206842 | -9.0444679  |
| N  | 15.7427688 | 12.3540567 | -7.9124049  |
| C  | 16.6405911 | 10.3318485 | -9.0629950  |
| C  | 17.1134645 | 9.6249179  | -7.9189955  |
| C  | 17.6981701 | 8.3030723  | -7.9651027  |
| C  | 17.9385531 | 7.9333394  | -6.6606795  |
| C  | 17.5023446 | 9.0350283  | -5.8302480  |
| N  | 17.0164354 | 10.0597413 | -6.6145497  |
| C  | 17.5446267 | 9.0330658  | -4.4028547  |
| C  | 17.1604800 | 10.1284097 | -3.5703169  |
| C  | 17.2568363 | 10.1282823 | -2.1269605  |

|    |             |            |             |
|----|-------------|------------|-------------|
| C  | 16.7490113  | 11.3341550 | -1.6973112  |
| C  | 16.3398682  | 12.0560670 | -2.8815779  |
| N  | 16.6131795  | 11.3145088 | -4.0114675  |
| C  | 15.6787945  | 13.3192453 | -2.8620363  |
| H  | 13.5649897  | 16.4496883 | -5.6096604  |
| H  | 14.2806022  | 15.8463155 | -3.0387681  |
| H  | 14.3670063  | 14.2003975 | -10.3635345 |
| H  | 15.6154191  | 11.9335775 | -11.2461115 |
| H  | 17.8910088  | 7.7342824  | -8.8812730  |
| H  | 18.3722124  | 6.9996870  | -6.2873868  |
| H  | 17.6597353  | 9.3068371  | -1.5251714  |
| H  | 16.6467979  | 11.7031548 | -0.6710425  |
| Zn | -0.0000000  | 18.6480069 | 0.0000000   |
| C  | -4.2602430  | 18.6072143 | 0.8025557   |
| C  | -3.7939222  | 18.6078430 | 2.0977995   |
| C  | -2.3497719  | 18.6275052 | 2.0184406   |
| C  | -3.0969989  | 18.6260440 | -0.0567658  |
| N  | -1.9445586  | 18.6446332 | 0.7004169   |
| C  | -3.1534223  | 18.6072508 | -1.4832801  |
| C  | -2.0184406  | 18.6275052 | -2.3497719  |
| C  | -2.0977995  | 18.6078430 | -3.7939222  |
| C  | -0.8025557  | 18.6072143 | -4.2602430  |
| C  | 0.0567658   | 18.6260440 | -3.0969989  |
| N  | -0.7004169  | 18.6446332 | -1.9445586  |
| C  | 1.4832801   | 18.6072508 | -3.1534223  |
| C  | 2.3497719   | 18.6275052 | -2.0184406  |
| C  | 3.7939222   | 18.6078430 | -2.0977995  |
| C  | 4.2602430   | 18.6072143 | -0.8025557  |
| C  | 3.0969989   | 18.6260440 | 0.0567658   |
| N  | 1.9445586   | 18.6446332 | -0.7004169  |
| C  | 3.1534223   | 18.6072508 | 1.4832801   |
| C  | 2.0184406   | 18.6275052 | 2.3497719   |
| C  | 2.0977995   | 18.6078430 | 3.7939222   |
| C  | 0.8025557   | 18.6072143 | 4.2602430   |
| C  | -0.0567658  | 18.6260440 | 3.0969989   |
| N  | 0.7004169   | 18.6446332 | 1.9445586   |
| C  | -1.4832801  | 18.6072508 | 3.1534223   |
| H  | -5.2980831  | 18.5932337 | 0.4535966   |
| H  | -4.3713057  | 18.5936140 | 3.0280515   |
| H  | -3.0280515  | 18.5936140 | -4.3713057  |
| H  | -0.4535966  | 18.5932337 | -5.2980831  |
| H  | 4.3713057   | 18.5936140 | -3.0280515  |
| H  | 5.2980831   | 18.5932337 | -0.4535966  |
| H  | 3.0280515   | 18.5936140 | 4.3713057   |
| H  | 0.4535966   | 18.5932337 | 5.2980831   |
| Zn | -16.1813880 | 11.8333606 | 5.9631137   |
| C  | -16.7490113 | 11.3341550 | 1.6973112   |
| C  | -17.2568363 | 10.1282823 | 2.1269605   |
| C  | -17.1604800 | 10.1284097 | 3.5703169   |

|    |             |            |            |
|----|-------------|------------|------------|
| C  | -16.3398682 | 12.0560670 | 2.8815779  |
| N  | -16.6131795 | 11.3145088 | 4.0114675  |
| C  | -15.6787945 | 13.3192453 | 2.8620363  |
| C  | -15.2104472 | 14.0268368 | 4.0083706  |
| C  | -14.4887669 | 15.2802935 | 3.9521045  |
| C  | -14.1276982 | 15.5838870 | 5.2446466  |
| C  | -14.6469481 | 14.5223030 | 6.0767400  |
| N  | -15.3143232 | 13.5922668 | 5.3109232  |
| C  | -14.4502826 | 14.4411416 | 7.4847441  |
| C  | -15.0274399 | 13.4534725 | 8.3368703  |
| C  | -14.8837617 | 13.4357002 | 9.7743488  |
| C  | -15.5134236 | 12.2949533 | 10.2181116 |
| C  | -16.0241020 | 11.6206842 | 9.0444679  |
| N  | -15.7427688 | 12.3540567 | 7.9124049  |
| C  | -16.6405911 | 10.3318485 | 9.0629950  |
| C  | -17.1134645 | 9.6249179  | 7.9189955  |
| C  | -17.6981701 | 8.3030723  | 7.9651027  |
| C  | -17.9385531 | 7.9333394  | 6.6606795  |
| C  | -17.5023446 | 9.0350283  | 5.8302480  |
| N  | -17.0164354 | 10.0597413 | 6.6145497  |
| C  | -17.5446267 | 9.0330658  | 4.4028547  |
| H  | -16.6467979 | 11.7031548 | 0.6710425  |
| H  | -17.6597353 | 9.3068371  | 1.5251714  |
| H  | -14.2806022 | 15.8463155 | 3.0387681  |
| H  | -13.5649897 | 16.4496883 | 5.6096604  |
| H  | -14.3670063 | 14.2003975 | 10.3635345 |
| H  | -15.6154191 | 11.9335775 | 11.2461115 |
| H  | -17.8910088 | 7.7342824  | 8.8812730  |
| H  | -18.3722124 | 6.9996870  | 6.2873868  |
| Zn | -11.8333606 | 5.9631137  | 16.1813880 |
| C  | -15.5838870 | 5.2446466  | 14.1276982 |
| C  | -15.2802935 | 3.9521045  | 14.4887669 |
| C  | -14.0268368 | 4.0083706  | 15.2104472 |
| C  | -14.5223030 | 6.0767400  | 14.6469481 |
| N  | -13.5922668 | 5.3109232  | 15.3143232 |
| C  | -14.4411416 | 7.4847441  | 14.4502826 |
| C  | -13.4534725 | 8.3368703  | 15.0274399 |
| C  | -13.4357002 | 9.7743488  | 14.8837617 |
| C  | -12.2949533 | 10.2181116 | 15.5134236 |
| C  | -11.6206842 | 9.0444679  | 16.0241020 |
| N  | -12.3540567 | 7.9124049  | 15.7427688 |
| C  | -10.3318485 | 9.0629950  | 16.6405911 |
| C  | -9.6249179  | 7.9189955  | 17.1134645 |
| C  | -8.3030723  | 7.9651027  | 17.6981701 |
| C  | -7.9333394  | 6.6606795  | 17.9385531 |
| C  | -9.0350283  | 5.8302480  | 17.5023446 |
| N  | -10.0597413 | 6.6145497  | 17.0164354 |
| C  | -9.0330658  | 4.4028547  | 17.5446267 |
| C  | -10.1284097 | 3.5703169  | 17.1604800 |

|    |             |             |            |
|----|-------------|-------------|------------|
| C  | -10.1282823 | 2.1269605   | 17.2568363 |
| C  | -11.3341550 | 1.6973112   | 16.7490113 |
| C  | -12.0560670 | 2.8815779   | 16.3398682 |
| N  | -11.3145088 | 4.0114675   | 16.6131795 |
| C  | -13.3192453 | 2.8620363   | 15.6787945 |
| H  | -16.4496883 | 5.6096604   | 13.5649897 |
| H  | -15.8463155 | 3.0387681   | 14.2806022 |
| H  | -14.2003975 | 10.3635345  | 14.3670063 |
| H  | -11.9335775 | 11.2461115  | 15.6154191 |
| H  | -7.7342824  | 8.8812730   | 17.8910088 |
| H  | -6.9996870  | 6.2873868   | 18.3722124 |
| H  | -9.3068371  | 1.5251714   | 17.6597353 |
| H  | -11.7031548 | 0.6710425   | 16.6467979 |
| Zn | -5.9631137  | -11.8333606 | 16.1813880 |
| C  | -6.6606795  | -7.9333394  | 17.9385531 |
| C  | -7.9651027  | -8.3030723  | 17.6981701 |
| C  | -7.9189955  | -9.6249179  | 17.1134645 |
| C  | -5.8302480  | -9.0350283  | 17.5023446 |
| N  | -6.6145497  | -10.0597413 | 17.0164354 |
| C  | -4.4028547  | -9.0330658  | 17.5446267 |
| C  | -3.5703169  | -10.1284097 | 17.1604800 |
| C  | -2.1269605  | -10.1282823 | 17.2568363 |
| C  | -1.6973112  | -11.3341550 | 16.7490113 |
| C  | -2.8815779  | -12.0560670 | 16.3398682 |
| N  | -4.0114675  | -11.3145088 | 16.6131795 |
| C  | -2.8620363  | -13.3192453 | 15.6787945 |
| C  | -4.0083706  | -14.0268368 | 15.2104472 |
| C  | -3.9521045  | -15.2802935 | 14.4887669 |
| C  | -5.2446466  | -15.5838870 | 14.1276982 |
| C  | -6.0767400  | -14.5223030 | 14.6469481 |
| N  | -5.3109232  | -13.5922668 | 15.3143232 |
| C  | -7.4847441  | -14.4411416 | 14.4502826 |
| C  | -8.3368703  | -13.4534725 | 15.0274399 |
| C  | -9.7743488  | -13.4357002 | 14.8837617 |
| C  | -10.2181116 | -12.2949533 | 15.5134236 |
| C  | -9.0444679  | -11.6206842 | 16.0241020 |
| N  | -7.9124049  | -12.3540567 | 15.7427688 |
| C  | -9.0629950  | -10.3318485 | 16.6405911 |
| H  | -6.2873868  | -6.9996870  | 18.3722124 |
| H  | -8.8812730  | -7.7342824  | 17.8910088 |
| H  | -1.5251714  | -9.3068371  | 17.6597353 |
| H  | -0.6710425  | -11.7031548 | 16.6467979 |
| H  | -3.0387681  | -15.8463155 | 14.2806022 |
| H  | -5.6096604  | -16.4496883 | 13.5649897 |
| H  | -10.3635345 | -14.2003975 | 14.3670063 |
| H  | -11.2461115 | -11.9335775 | 15.6154191 |
| Zn | 5.9631137   | -16.1813880 | 11.8333606 |
| C  | 5.2446466   | -14.1276982 | 15.5838870 |
| C  | 3.9521045   | -14.4887669 | 15.2802935 |

|    |            |             |            |
|----|------------|-------------|------------|
| C  | 4.0083706  | -15.2104472 | 14.0268368 |
| C  | 6.0767400  | -14.6469481 | 14.5223030 |
| N  | 5.3109232  | -15.3143232 | 13.5922668 |
| C  | 7.4847441  | -14.4502826 | 14.4411416 |
| C  | 8.3368703  | -15.0274399 | 13.4534725 |
| C  | 9.7743488  | -14.8837617 | 13.4357002 |
| C  | 10.2181116 | -15.5134236 | 12.2949533 |
| C  | 9.0444679  | -16.0241020 | 11.6206842 |
| N  | 7.9124049  | -15.7427688 | 12.3540567 |
| C  | 9.0629950  | -16.6405911 | 10.3318485 |
| C  | 7.9189955  | -17.1134645 | 9.6249179  |
| C  | 7.9651027  | -17.6981701 | 8.3030723  |
| C  | 6.6606795  | -17.9385531 | 7.9333394  |
| C  | 5.8302480  | -17.5023446 | 9.0350283  |
| N  | 6.6145497  | -17.0164354 | 10.0597413 |
| C  | 4.4028547  | -17.5446267 | 9.0330658  |
| C  | 3.5703169  | -17.1604800 | 10.1284097 |
| C  | 2.1269605  | -17.2568363 | 10.1282823 |
| C  | 1.6973112  | -16.7490113 | 11.3341550 |
| C  | 2.8815779  | -16.3398682 | 12.0560670 |
| N  | 4.0114675  | -16.6131795 | 11.3145088 |
| C  | 2.8620363  | -15.6787945 | 13.3192453 |
| H  | 5.6096604  | -13.5649897 | 16.4496883 |
| H  | 3.0387681  | -14.2806022 | 15.8463155 |
| H  | 10.3635345 | -14.3670063 | 14.2003975 |
| H  | 11.2461115 | -15.6154191 | 11.9335775 |
| H  | 8.8812730  | -17.8910088 | 7.7342824  |
| H  | 6.2873868  | -18.3722124 | 6.9996870  |
| H  | 1.5251714  | -17.6597353 | 9.3068371  |
| H  | 0.6710425  | -16.6467979 | 11.7031548 |
| Zn | 16.1813880 | -11.8333606 | 5.9631137  |
| C  | 17.9385531 | -7.9333394  | 6.6606795  |
| C  | 17.6981701 | -8.3030723  | 7.9651027  |
| C  | 17.1134645 | -9.6249179  | 7.9189955  |
| C  | 17.5023446 | -9.0350283  | 5.8302480  |
| N  | 17.0164354 | -10.0597413 | 6.6145497  |
| C  | 17.5446267 | -9.0330658  | 4.4028547  |
| C  | 17.1604800 | -10.1284097 | 3.5703169  |
| C  | 17.2568363 | -10.1282823 | 2.1269605  |
| C  | 16.7490113 | -11.3341550 | 1.6973112  |
| C  | 16.3398682 | -12.0560670 | 2.8815779  |
| N  | 16.6131795 | -11.3145088 | 4.0114675  |
| C  | 15.6787945 | -13.3192453 | 2.8620363  |
| C  | 15.2104472 | -14.0268368 | 4.0083706  |
| C  | 14.4887669 | -15.2802935 | 3.9521045  |
| C  | 14.1276982 | -15.5838870 | 5.2446466  |
| C  | 14.6469481 | -14.5223030 | 6.0767400  |
| N  | 15.3143232 | -13.5922668 | 5.3109232  |
| C  | 14.4502826 | -14.4411416 | 7.4847441  |



|    |            |             |             |
|----|------------|-------------|-------------|
| C  | 15.0274399 | -13.4534725 | 8.3368703   |
| C  | 14.8837617 | -13.4357002 | 9.7743488   |
| C  | 15.5134236 | -12.2949533 | 10.2181116  |
| C  | 16.0241020 | -11.6206842 | 9.0444679   |
| N  | 15.7427688 | -12.3540567 | 7.9124049   |
| C  | 16.6405911 | -10.3318485 | 9.0629950   |
| H  | 18.3722124 | -6.9996870  | 6.2873868   |
| H  | 17.8910088 | -7.7342824  | 8.8812730   |
| H  | 17.6597353 | -9.3068371  | 1.5251714   |
| H  | 16.6467979 | -11.7031548 | 0.6710425   |
| H  | 14.2806022 | -15.8463155 | 3.0387681   |
| H  | 13.5649897 | -16.4496883 | 5.6096604   |
| H  | 14.3670063 | -14.2003975 | 10.3635345  |
| H  | 15.6154191 | -11.9335775 | 11.2461115  |
| Zn | 16.1813880 | -5.9631137  | -11.8333606 |
| C  | 16.7490113 | -1.6973112  | -11.3341550 |
| C  | 17.2568363 | -2.1269605  | -10.1282823 |
| C  | 17.1604800 | -3.5703169  | -10.1284097 |
| C  | 16.3398682 | -2.8815779  | -12.0560670 |
| N  | 16.6131795 | -4.0114675  | -11.3145088 |
| C  | 15.6787945 | -2.8620363  | -13.3192453 |
| C  | 15.2104472 | -4.0083706  | -14.0268368 |
| C  | 14.4887669 | -3.9521045  | -15.2802935 |
| C  | 14.1276982 | -5.2446466  | -15.5838870 |
| C  | 14.6469481 | -6.0767400  | -14.5223030 |
| N  | 15.3143232 | -5.3109232  | -13.5922668 |
| C  | 14.4502826 | -7.4847441  | -14.4411416 |
| C  | 15.0274399 | -8.3368703  | -13.4534725 |
| C  | 14.8837617 | -9.7743488  | -13.4357002 |
| C  | 15.5134236 | -10.2181116 | -12.2949533 |
| C  | 16.0241020 | -9.0444679  | -11.6206842 |
| N  | 15.7427688 | -7.9124049  | -12.3540567 |
| C  | 16.6405911 | -9.0629950  | -10.3318485 |
| C  | 17.1134645 | -7.9189955  | -9.6249179  |
| C  | 17.6981701 | -7.9651027  | -8.3030723  |
| C  | 17.9385531 | -6.6606795  | -7.9333394  |
| C  | 17.5023446 | -5.8302480  | -9.0350283  |
| N  | 17.0164354 | -6.6145497  | -10.0597413 |
| C  | 17.5446267 | -4.4028547  | -9.0330658  |
| H  | 16.6467979 | -0.6710425  | -11.7031548 |
| H  | 17.6597353 | -1.5251714  | -9.3068371  |
| H  | 14.2806022 | -3.0387681  | -15.8463155 |
| H  | 13.5649897 | -5.6096604  | -16.4496883 |
| H  | 14.3670063 | -10.3635345 | -14.2003975 |
| H  | 15.6154191 | -11.2461115 | -11.9335775 |
| H  | 17.8910088 | -8.8812730  | -7.7342824  |
| H  | 18.3722124 | -6.2873868  | -6.9996870  |
| Zn | 11.8333606 | 5.9631137   | -16.1813880 |
| C  | 7.9333394  | 6.6606795   | -17.9385531 |

|    |            |            |             |
|----|------------|------------|-------------|
| C  | 8.3030723  | 7.9651027  | -17.6981701 |
| C  | 9.6249179  | 7.9189955  | -17.1134645 |
| C  | 9.0350283  | 5.8302480  | -17.5023446 |
| N  | 10.0597413 | 6.6145497  | -17.0164354 |
| C  | 9.0330658  | 4.4028547  | -17.5446267 |
| C  | 10.1284097 | 3.5703169  | -17.1604800 |
| C  | 10.1282823 | 2.1269605  | -17.2568363 |
| C  | 11.3341550 | 1.6973112  | -16.7490113 |
| C  | 12.0560670 | 2.8815779  | -16.3398682 |
| N  | 11.3145088 | 4.0114675  | -16.6131795 |
| C  | 13.3192453 | 2.8620363  | -15.6787945 |
| C  | 14.0268368 | 4.0083706  | -15.2104472 |
| C  | 15.2802935 | 3.9521045  | -14.4887669 |
| C  | 15.5838870 | 5.2446466  | -14.1276982 |
| C  | 14.5223030 | 6.0767400  | -14.6469481 |
| N  | 13.5922668 | 5.3109232  | -15.3143232 |
| C  | 14.4411416 | 7.4847441  | -14.4502826 |
| C  | 13.4534725 | 8.3368703  | -15.0274399 |
| C  | 13.4357002 | 9.7743488  | -14.8837617 |
| C  | 12.2949533 | 10.2181116 | -15.5134236 |
| C  | 11.6206842 | 9.0444679  | -16.0241020 |
| N  | 12.3540567 | 7.9124049  | -15.7427688 |
| C  | 10.3318485 | 9.0629950  | -16.6405911 |
| H  | 6.9996870  | 6.2873868  | -18.3722124 |
| H  | 7.7342824  | 8.8812730  | -17.8910088 |
| H  | 9.3068371  | 1.5251714  | -17.6597353 |
| H  | 11.7031548 | 0.6710425  | -16.6467979 |
| H  | 15.8463155 | 3.0387681  | -14.2806022 |
| H  | 16.4496883 | 5.6096604  | -13.5649897 |
| H  | 14.2003975 | 10.3635345 | -14.3670063 |
| H  | 11.9335775 | 11.2461115 | -15.6154191 |
| Zn | 5.9631137  | 16.1813880 | -11.8333606 |
| C  | 1.6973112  | 16.7490113 | -11.3341550 |
| C  | 2.1269605  | 17.2568363 | -10.1282823 |
| C  | 3.5703169  | 17.1604800 | -10.1284097 |
| C  | 2.8815779  | 16.3398682 | -12.0560670 |
| N  | 4.0114675  | 16.6131795 | -11.3145088 |
| C  | 2.8620363  | 15.6787945 | -13.3192453 |
| C  | 4.0083706  | 15.2104472 | -14.0268368 |
| C  | 3.9521045  | 14.4887669 | -15.2802935 |
| C  | 5.2446466  | 14.1276982 | -15.5838870 |
| C  | 6.0767400  | 14.6469481 | -14.5223030 |
| N  | 5.3109232  | 15.3143232 | -13.5922668 |
| C  | 7.4847441  | 14.4502826 | -14.4411416 |
| C  | 8.3368703  | 15.0274399 | -13.4534725 |
| C  | 9.7743488  | 14.8837617 | -13.4357002 |
| C  | 10.2181116 | 15.5134236 | -12.2949533 |
| C  | 9.0444679  | 16.0241020 | -11.6206842 |
| N  | 7.9124049  | 15.7427688 | -12.3540567 |

|    |             |            |             |
|----|-------------|------------|-------------|
| C  | 9.0629950   | 16.6405911 | -10.3318485 |
| C  | 7.9189955   | 17.1134645 | -9.6249179  |
| C  | 7.9651027   | 17.6981701 | -8.3030723  |
| C  | 6.6606795   | 17.9385531 | -7.9333394  |
| C  | 5.8302480   | 17.5023446 | -9.0350283  |
| N  | 6.6145497   | 17.0164354 | -10.0597413 |
| C  | 4.4028547   | 17.5446267 | -9.0330658  |
| H  | 0.6710425   | 16.6467979 | -11.7031548 |
| H  | 1.5251714   | 17.6597353 | -9.3068371  |
| H  | 3.0387681   | 14.2806022 | -15.8463155 |
| H  | 5.6096604   | 13.5649897 | -16.4496883 |
| H  | 10.3635345  | 14.3670063 | -14.2003975 |
| H  | 11.2461115  | 15.6154191 | -11.9335775 |
| H  | 8.8812730   | 17.8910088 | -7.7342824  |
| H  | 6.2873868   | 18.3722124 | -6.9996870  |
| Zn | -11.8333606 | 16.1813880 | -5.9631137  |
| C  | -15.5838870 | 14.1276982 | -5.2446466  |
| C  | -15.2802935 | 14.4887669 | -3.9521045  |
| C  | -14.0268368 | 15.2104472 | -4.0083706  |
| C  | -14.5223030 | 14.6469481 | -6.0767400  |
| N  | -13.5922668 | 15.3143232 | -5.3109232  |
| C  | -14.4411416 | 14.4502826 | -7.4847441  |
| C  | -13.4534725 | 15.0274399 | -8.3368703  |
| C  | -13.4357002 | 14.8837617 | -9.7743488  |
| C  | -12.2949533 | 15.5134236 | -10.2181116 |
| C  | -11.6206842 | 16.0241020 | -9.0444679  |
| N  | -12.3540567 | 15.7427688 | -7.9124049  |
| C  | -10.3318485 | 16.6405911 | -9.0629950  |
| C  | -9.6249179  | 17.1134645 | -7.9189955  |
| C  | -8.3030723  | 17.6981701 | -7.9651027  |
| C  | -7.9333394  | 17.9385531 | -6.6606795  |
| C  | -9.0350283  | 17.5023446 | -5.8302480  |
| N  | -10.0597413 | 17.0164354 | -6.6145497  |
| C  | -9.0330658  | 17.5446267 | -4.4028547  |
| C  | -10.1284097 | 17.1604800 | -3.5703169  |
| C  | -10.1282823 | 17.2568363 | -2.1269605  |
| C  | -11.3341550 | 16.7490113 | -1.6973112  |
| C  | -12.0560670 | 16.3398682 | -2.8815779  |
| N  | -11.3145088 | 16.6131795 | -4.0114675  |
| C  | -13.3192453 | 15.6787945 | -2.8620363  |
| H  | -16.4496883 | 13.5649897 | -5.6096604  |
| H  | -15.8463155 | 14.2806022 | -3.0387681  |
| H  | -14.2003975 | 14.3670063 | -10.3635345 |
| H  | -11.9335775 | 15.6154191 | -11.2461115 |
| H  | -7.7342824  | 17.8910088 | -8.8812730  |
| H  | -6.9996870  | 18.3722124 | -6.2873868  |
| H  | -9.3068371  | 17.6597353 | -1.5251714  |
| H  | -11.7031548 | 16.6467979 | -0.6710425  |
| Zn | -18.6480069 | -0.0000000 | -0.0000000  |

|    |             |             |            |
|----|-------------|-------------|------------|
| C  | -18.6072143 | -0.8025557  | -4.2602430 |
| C  | -18.6078430 | -2.0977995  | -3.7939222 |
| C  | -18.6275052 | -2.0184406  | -2.3497719 |
| C  | -18.6260440 | 0.0567658   | -3.0969989 |
| N  | -18.6446332 | -0.7004169  | -1.9445586 |
| C  | -18.6072508 | 1.4832801   | -3.1534223 |
| C  | -18.6275052 | 2.3497719   | -2.0184406 |
| C  | -18.6078430 | 3.7939222   | -2.0977995 |
| C  | -18.6072143 | 4.2602430   | -0.8025557 |
| C  | -18.6260440 | 3.0969989   | 0.0567658  |
| N  | -18.6446332 | 1.9445586   | -0.7004169 |
| C  | -18.6072508 | 3.1534223   | 1.4832801  |
| C  | -18.6275052 | 2.0184406   | 2.3497719  |
| C  | -18.6078430 | 2.0977995   | 3.7939222  |
| C  | -18.6072143 | 0.8025557   | 4.2602430  |
| C  | -18.6260440 | -0.0567658  | 3.0969989  |
| N  | -18.6446332 | 0.7004169   | 1.9445586  |
| C  | -18.6072508 | -1.4832801  | 3.1534223  |
| C  | -18.6275052 | -2.3497719  | 2.0184406  |
| C  | -18.6078430 | -3.7939222  | 2.0977995  |
| C  | -18.6072143 | -4.2602430  | 0.8025557  |
| C  | -18.6260440 | -3.0969989  | -0.0567658 |
| N  | -18.6446332 | -1.9445586  | 0.7004169  |
| C  | -18.6072508 | -3.1534223  | -1.4832801 |
| H  | -18.5932337 | -0.4535966  | -5.2980831 |
| H  | -18.5936140 | -3.0280515  | -4.3713057 |
| H  | -18.5936140 | 4.3713057   | -3.0280515 |
| H  | -18.5932337 | 5.2980831   | -0.4535966 |
| H  | -18.5936140 | 3.0280515   | 4.3713057  |
| H  | -18.5932337 | 0.4535966   | 5.2980831  |
| H  | -18.5936140 | -4.3713057  | 3.0280515  |
| H  | -18.5932337 | -5.2980831  | 0.4535966  |
| Zn | -16.1813880 | -5.9631137  | 11.8333606 |
| C  | -16.7490113 | -1.6973112  | 11.3341550 |
| C  | -17.2568363 | -2.1269605  | 10.1282823 |
| C  | -17.1604800 | -3.5703169  | 10.1284097 |
| C  | -16.3398682 | -2.8815779  | 12.0560670 |
| N  | -16.6131795 | -4.0114675  | 11.3145088 |
| C  | -15.6787945 | -2.8620363  | 13.3192453 |
| C  | -15.2104472 | -4.0083706  | 14.0268368 |
| C  | -14.4887669 | -3.9521045  | 15.2802935 |
| C  | -14.1276982 | -5.2446466  | 15.5838870 |
| C  | -14.6469481 | -6.0767400  | 14.5223030 |
| N  | -15.3143232 | -5.3109232  | 13.5922668 |
| C  | -14.4502826 | -7.4847441  | 14.4411416 |
| C  | -15.0274399 | -8.3368703  | 13.4534725 |
| C  | -14.8837617 | -9.7743488  | 13.4357002 |
| C  | -15.5134236 | -10.2181116 | 12.2949533 |
| C  | -16.0241020 | -9.0444679  | 11.6206842 |

|    |             |             |            |
|----|-------------|-------------|------------|
| N  | -15.7427688 | -7.9124049  | 12.3540567 |
| C  | -16.6405911 | -9.0629950  | 10.3318485 |
| C  | -17.1134645 | -7.9189955  | 9.6249179  |
| C  | -17.6981701 | -7.9651027  | 8.3030723  |
| C  | -17.9385531 | -6.6606795  | 7.9333394  |
| C  | -17.5023446 | -5.8302480  | 9.0350283  |
| N  | -17.0164354 | -6.6145497  | 10.0597413 |
| C  | -17.5446267 | -4.4028547  | 9.0330658  |
| H  | -16.6467979 | -0.6710425  | 11.7031548 |
| H  | -17.6597353 | -1.5251714  | 9.3068371  |
| H  | -14.2806022 | -3.0387681  | 15.8463155 |
| H  | -13.5649897 | -5.6096604  | 16.4496883 |
| H  | -14.3670063 | -10.3635345 | 14.2003975 |
| H  | -15.6154191 | -11.2461115 | 11.9335775 |
| H  | -17.8910088 | -8.8812730  | 7.7342824  |
| H  | -18.3722124 | -6.2873868  | 6.9996870  |
| Zn | -11.8333606 | -16.1813880 | 5.9631137  |
| C  | -15.5838870 | -14.1276982 | 5.2446466  |
| C  | -15.2802935 | -14.4887669 | 3.9521045  |
| C  | -14.0268368 | -15.2104472 | 4.0083706  |
| C  | -14.5223030 | -14.6469481 | 6.0767400  |
| N  | -13.5922668 | -15.3143232 | 5.3109232  |
| C  | -14.4411416 | -14.4502826 | 7.4847441  |
| C  | -13.4534725 | -15.0274399 | 8.3368703  |
| C  | -13.4357002 | -14.8837617 | 9.7743488  |
| C  | -12.2949533 | -15.5134236 | 10.2181116 |
| C  | -11.6206842 | -16.0241020 | 9.0444679  |
| N  | -12.3540567 | -15.7427688 | 7.9124049  |
| C  | -10.3318485 | -16.6405911 | 9.0629950  |
| C  | -9.6249179  | -17.1134645 | 7.9189955  |
| C  | -8.3030723  | -17.6981701 | 7.9651027  |
| C  | -7.9333394  | -17.9385531 | 6.6606795  |
| C  | -9.0350283  | -17.5023446 | 5.8302480  |
| N  | -10.0597413 | -17.0164354 | 6.6145497  |
| C  | -9.0330658  | -17.5446267 | 4.4028547  |
| C  | -10.1284097 | -17.1604800 | 3.5703169  |
| C  | -10.1282823 | -17.2568363 | 2.1269605  |
| C  | -11.3341550 | -16.7490113 | 1.6973112  |
| C  | -12.0560670 | -16.3398682 | 2.8815779  |
| N  | -11.3145088 | -16.6131795 | 4.0114675  |
| C  | -13.3192453 | -15.6787945 | 2.8620363  |
| H  | -16.4496883 | -13.5649897 | 5.6096604  |
| H  | -15.8463155 | -14.2806022 | 3.0387681  |
| H  | -14.2003975 | -14.3670063 | 10.3635345 |
| H  | -11.9335775 | -15.6154191 | 11.2461115 |
| H  | -7.7342824  | -17.8910088 | 8.8812730  |
| H  | -6.9996870  | -18.3722124 | 6.2873868  |
| H  | -9.3068371  | -17.6597353 | 1.5251714  |
| H  | -11.7031548 | -16.6467979 | 0.6710425  |

|    |            |             |             |
|----|------------|-------------|-------------|
| Zn | -0.0000000 | -18.6480069 | -0.0000000  |
| C  | -0.8025557 | -18.6072143 | 4.2602430   |
| C  | -2.0977995 | -18.6078430 | 3.7939222   |
| C  | -2.0184406 | -18.6275052 | 2.3497719   |
| C  | 0.0567658  | -18.6260440 | 3.0969989   |
| N  | -0.7004169 | -18.6446332 | 1.9445586   |
| C  | 1.4832801  | -18.6072508 | 3.1534223   |
| C  | 2.3497719  | -18.6275052 | 2.0184406   |
| C  | 3.7939222  | -18.6078430 | 2.0977995   |
| C  | 4.2602430  | -18.6072143 | 0.8025557   |
| C  | 3.0969989  | -18.6260440 | -0.0567658  |
| N  | 1.9445586  | -18.6446332 | 0.7004169   |
| C  | 3.1534223  | -18.6072508 | -1.4832801  |
| C  | 2.0184406  | -18.6275052 | -2.3497719  |
| C  | 2.0977995  | -18.6078430 | -3.7939222  |
| C  | 0.8025557  | -18.6072143 | -4.2602430  |
| C  | -0.0567658 | -18.6260440 | -3.0969989  |
| N  | 0.7004169  | -18.6446332 | -1.9445586  |
| C  | -1.4832801 | -18.6072508 | -3.1534223  |
| C  | -2.3497719 | -18.6275052 | -2.0184406  |
| C  | -3.7939222 | -18.6078430 | -2.0977995  |
| C  | -4.2602430 | -18.6072143 | -0.8025557  |
| C  | -3.0969989 | -18.6260440 | 0.0567658   |
| N  | -1.9445586 | -18.6446332 | -0.7004169  |
| C  | -3.1534223 | -18.6072508 | 1.4832801   |
| H  | -0.4535966 | -18.5932337 | 5.2980831   |
| H  | -3.0280515 | -18.5936140 | 4.3713057   |
| H  | 4.3713057  | -18.5936140 | 3.0280515   |
| H  | 5.2980831  | -18.5932337 | 0.4535966   |
| H  | 3.0280515  | -18.5936140 | -4.3713057  |
| H  | 0.4535966  | -18.5932337 | -5.2980831  |
| H  | -4.3713057 | -18.5936140 | -3.0280515  |
| H  | -5.2980831 | -18.5932337 | -0.4535966  |
| Zn | 11.8333606 | -16.1813880 | -5.9631137  |
| C  | 15.5838870 | -14.1276982 | -5.2446466  |
| C  | 15.2802935 | -14.4887669 | -3.9521045  |
| C  | 14.0268368 | -15.2104472 | -4.0083706  |
| C  | 14.5223030 | -14.6469481 | -6.0767400  |
| N  | 13.5922668 | -15.3143232 | -5.3109232  |
| C  | 14.4411416 | -14.4502826 | -7.4847441  |
| C  | 13.4534725 | -15.0274399 | -8.3368703  |
| C  | 13.4357002 | -14.8837617 | -9.7743488  |
| C  | 12.2949533 | -15.5134236 | -10.2181116 |
| C  | 11.6206842 | -16.0241020 | -9.0444679  |
| N  | 12.3540567 | -15.7427688 | -7.9124049  |
| C  | 10.3318485 | -16.6405911 | -9.0629950  |
| C  | 9.6249179  | -17.1134645 | -7.9189955  |
| C  | 8.3030723  | -17.6981701 | -7.9651027  |
| C  | 7.9333394  | -17.9385531 | -6.6606795  |

|    |            |             |             |
|----|------------|-------------|-------------|
| C  | 9.0350283  | -17.5023446 | -5.8302480  |
| N  | 10.0597413 | -17.0164354 | -6.6145497  |
| C  | 9.0330658  | -17.5446267 | -4.4028547  |
| C  | 10.1284097 | -17.1604800 | -3.5703169  |
| C  | 10.1282823 | -17.2568363 | -2.1269605  |
| C  | 11.3341550 | -16.7490113 | -1.6973112  |
| C  | 12.0560670 | -16.3398682 | -2.8815779  |
| N  | 11.3145088 | -16.6131795 | -4.0114675  |
| C  | 13.3192453 | -15.6787945 | -2.8620363  |
| H  | 16.4496883 | -13.5649897 | -5.6096604  |
| H  | 15.8463155 | -14.2806022 | -3.0387681  |
| H  | 14.2003975 | -14.3670063 | -10.3635345 |
| H  | 11.9335775 | -15.6154191 | -11.2461115 |
| H  | 7.7342824  | -17.8910088 | -8.8812730  |
| H  | 6.9996870  | -18.3722124 | -6.2873868  |
| H  | 9.3068371  | -17.6597353 | -1.5251714  |
| H  | 11.7031548 | -16.6467979 | -0.6710425  |
| Zn | 5.9631137  | -11.8333606 | -16.1813880 |
| C  | 6.6606795  | -7.9333394  | -17.9385531 |
| C  | 7.9651027  | -8.3030723  | -17.6981701 |
| C  | 7.9189955  | -9.6249179  | -17.1134645 |
| C  | 5.8302480  | -9.0350283  | -17.5023446 |
| N  | 6.6145497  | -10.0597413 | -17.0164354 |
| C  | 4.4028547  | -9.0330658  | -17.5446267 |
| C  | 3.5703169  | -10.1284097 | -17.1604800 |
| C  | 2.1269605  | -10.1282823 | -17.2568363 |
| C  | 1.6973112  | -11.3341550 | -16.7490113 |
| C  | 2.8815779  | -12.0560670 | -16.3398682 |
| N  | 4.0114675  | -11.3145088 | -16.6131795 |
| C  | 2.8620363  | -13.3192453 | -15.6787945 |
| C  | 4.0083706  | -14.0268368 | -15.2104472 |
| C  | 3.9521045  | -15.2802935 | -14.4887669 |
| C  | 5.2446466  | -15.5838870 | -14.1276982 |
| C  | 6.0767400  | -14.5223030 | -14.6469481 |
| N  | 5.3109232  | -13.5922668 | -15.3143232 |
| C  | 7.4847441  | -14.4411416 | -14.4502826 |
| C  | 8.3368703  | -13.4534725 | -15.0274399 |
| C  | 9.7743488  | -13.4357002 | -14.8837617 |
| C  | 10.2181116 | -12.2949533 | -15.5134236 |
| C  | 9.0444679  | -11.6206842 | -16.0241020 |
| N  | 7.9124049  | -12.3540567 | -15.7427688 |
| C  | 9.0629950  | -10.3318485 | -16.6405911 |
| H  | 6.2873868  | -6.9996870  | -18.3722124 |
| H  | 8.8812730  | -7.7342824  | -17.8910088 |
| H  | 1.5251714  | -9.3068371  | -17.6597353 |
| H  | 0.6710425  | -11.7031548 | -16.6467979 |
| H  | 3.0387681  | -15.8463155 | -14.2806022 |
| H  | 5.6096604  | -16.4496883 | -13.5649897 |
| H  | 10.3635345 | -14.2003975 | -14.3670063 |

|    |             |             |             |
|----|-------------|-------------|-------------|
| H  | 11.2461115  | -11.9335775 | -15.6154191 |
| Zn | 0.0000000   | -0.0000000  | -18.6480069 |
| C  | -4.2602430  | 0.8025557   | -18.6072143 |
| C  | -3.7939222  | 2.0977995   | -18.6078430 |
| C  | -2.3497719  | 2.0184406   | -18.6275052 |
| C  | -3.0969989  | -0.0567658  | -18.6260440 |
| N  | -1.9445586  | 0.7004169   | -18.6446332 |
| C  | -3.1534223  | -1.4832801  | -18.6072508 |
| C  | -2.0184406  | -2.3497719  | -18.6275052 |
| C  | -2.0977995  | -3.7939222  | -18.6078430 |
| C  | -0.8025557  | -4.2602430  | -18.6072143 |
| C  | 0.0567658   | -3.0969989  | -18.6260440 |
| N  | -0.7004169  | -1.9445586  | -18.6446332 |
| C  | 1.4832801   | -3.1534223  | -18.6072508 |
| C  | 2.3497719   | -2.0184406  | -18.6275052 |
| C  | 3.7939222   | -2.0977995  | -18.6078430 |
| C  | 4.2602430   | -0.8025557  | -18.6072143 |
| C  | 3.0969989   | 0.0567658   | -18.6260440 |
| N  | 1.9445586   | -0.7004169  | -18.6446332 |
| C  | 3.1534223   | 1.4832801   | -18.6072508 |
| C  | 2.0184406   | 2.3497719   | -18.6275052 |
| C  | 2.0977995   | 3.7939222   | -18.6078430 |
| C  | 0.8025557   | 4.2602430   | -18.6072143 |
| C  | -0.0567658  | 3.0969989   | -18.6260440 |
| N  | 0.7004169   | 1.9445586   | -18.6446332 |
| C  | -1.4832801  | 3.1534223   | -18.6072508 |
| H  | -5.2980831  | 0.4535966   | -18.5932337 |
| H  | -4.3713057  | 3.0280515   | -18.5936140 |
| H  | -3.0280515  | -4.3713057  | -18.5936140 |
| H  | -0.4535966  | -5.2980831  | -18.5932337 |
| H  | 4.3713057   | -3.0280515  | -18.5936140 |
| H  | 5.2980831   | -0.4535966  | -18.5932337 |
| H  | 3.0280515   | 4.3713057   | -18.5936140 |
| H  | 0.4535966   | 5.2980831   | -18.5932337 |
| Zn | -5.9631137  | 11.8333606  | -16.1813880 |
| C  | -10.2181116 | 12.2949533  | -15.5134236 |
| C  | -9.7743488  | 13.4357002  | -14.8837617 |
| C  | -8.3368703  | 13.4534725  | -15.0274399 |
| C  | -9.0444679  | 11.6206842  | -16.0241020 |
| N  | -7.9124049  | 12.3540567  | -15.7427688 |
| C  | -9.0629950  | 10.3318485  | -16.6405911 |
| C  | -7.9189955  | 9.6249179   | -17.1134645 |
| C  | -7.9651027  | 8.3030723   | -17.6981701 |
| C  | -6.6606795  | 7.9333394   | -17.9385531 |
| C  | -5.8302480  | 9.0350283   | -17.5023446 |
| N  | -6.6145497  | 10.0597413  | -17.0164354 |
| C  | -4.4028547  | 9.0330658   | -17.5446267 |
| C  | -3.5703169  | 10.1284097  | -17.1604800 |
| C  | -2.1269605  | 10.1282823  | -17.2568363 |



|    |             |            |             |
|----|-------------|------------|-------------|
| C  | -1.6973112  | 11.3341550 | -16.7490113 |
| C  | -2.8815779  | 12.0560670 | -16.3398682 |
| N  | -4.0114675  | 11.3145088 | -16.6131795 |
| C  | -2.8620363  | 13.3192453 | -15.6787945 |
| C  | -4.0083706  | 14.0268368 | -15.2104472 |
| C  | -3.9521045  | 15.2802935 | -14.4887669 |
| C  | -5.2446466  | 15.5838870 | -14.1276982 |
| C  | -6.0767400  | 14.5223030 | -14.6469481 |
| N  | -5.3109232  | 13.5922668 | -15.3143232 |
| C  | -7.4847441  | 14.4411416 | -14.4502826 |
| H  | -11.2461115 | 11.9335775 | -15.6154191 |
| H  | -10.3635345 | 14.2003975 | -14.3670063 |
| H  | -8.8812730  | 7.7342824  | -17.8910088 |
| H  | -6.2873868  | 6.9996870  | -18.3722124 |
| H  | -1.5251714  | 9.3068371  | -17.6597353 |
| H  | -0.6710425  | 11.7031548 | -16.6467979 |
| H  | -3.0387681  | 15.8463155 | -14.2806022 |
| H  | -5.6096604  | 16.4496883 | -13.5649897 |
| Zn | -16.1813880 | 5.9631137  | -11.8333606 |
| C  | -16.7490113 | 1.6973112  | -11.3341550 |
| C  | -17.2568363 | 2.1269605  | -10.1282823 |
| C  | -17.1604800 | 3.5703169  | -10.1284097 |
| C  | -16.3398682 | 2.8815779  | -12.0560670 |
| N  | -16.6131795 | 4.0114675  | -11.3145088 |
| C  | -15.6787945 | 2.8620363  | -13.3192453 |
| C  | -15.2104472 | 4.0083706  | -14.0268368 |
| C  | -14.4887669 | 3.9521045  | -15.2802935 |
| C  | -14.1276982 | 5.2446466  | -15.5838870 |
| C  | -14.6469481 | 6.0767400  | -14.5223030 |
| N  | -15.3143232 | 5.3109232  | -13.5922668 |
| C  | -14.4502826 | 7.4847441  | -14.4411416 |
| C  | -15.0274399 | 8.3368703  | -13.4534725 |
| C  | -14.8837617 | 9.7743488  | -13.4357002 |
| C  | -15.5134236 | 10.2181116 | -12.2949533 |
| C  | -16.0241020 | 9.0444679  | -11.6206842 |
| N  | -15.7427688 | 7.9124049  | -12.3540567 |
| C  | -16.6405911 | 9.0629950  | -10.3318485 |
| C  | -17.1134645 | 7.9189955  | -9.6249179  |
| C  | -17.6981701 | 7.9651027  | -8.3030723  |
| C  | -17.9385531 | 6.6606795  | -7.9333394  |
| C  | -17.5023446 | 5.8302480  | -9.0350283  |
| N  | -17.0164354 | 6.6145497  | -10.0597413 |
| C  | -17.5446267 | 4.4028547  | -9.0330658  |
| H  | -16.6467979 | 0.6710425  | -11.7031548 |
| H  | -17.6597353 | 1.5251714  | -9.3068371  |
| H  | -14.2806022 | 3.0387681  | -15.8463155 |
| H  | -13.5649897 | 5.6096604  | -16.4496883 |
| H  | -14.3670063 | 10.3635345 | -14.2003975 |
| H  | -15.6154191 | 11.2461115 | -11.9335775 |

|    |             |             |             |
|----|-------------|-------------|-------------|
| H  | -17.8910088 | 8.8812730   | -7.7342824  |
| H  | -18.3722124 | 6.2873868   | -6.9996870  |
| Zn | -16.1813880 | -11.8333606 | -5.9631137  |
| C  | -17.9385531 | -7.9333394  | -6.6606795  |
| C  | -17.6981701 | -8.3030723  | -7.9651027  |
| C  | -17.1134645 | -9.6249179  | -7.9189955  |
| C  | -17.5023446 | -9.0350283  | -5.8302480  |
| N  | -17.0164354 | -10.0597413 | -6.6145497  |
| C  | -17.5446267 | -9.0330658  | -4.4028547  |
| C  | -17.1604800 | -10.1284097 | -3.5703169  |
| C  | -17.2568363 | -10.1282823 | -2.1269605  |
| C  | -16.7490113 | -11.3341550 | -1.6973112  |
| C  | -16.3398682 | -12.0560670 | -2.8815779  |
| N  | -16.6131795 | -11.3145088 | -4.0114675  |
| C  | -15.6787945 | -13.3192453 | -2.8620363  |
| C  | -15.2104472 | -14.0268368 | -4.0083706  |
| C  | -14.4887669 | -15.2802935 | -3.9521045  |
| C  | -14.1276982 | -15.5838870 | -5.2446466  |
| C  | -14.6469481 | -14.5223030 | -6.0767400  |
| N  | -15.3143232 | -13.5922668 | -5.3109232  |
| C  | -14.4502826 | -14.4411416 | -7.4847441  |
| C  | -15.0274399 | -13.4534725 | -8.3368703  |
| C  | -14.8837617 | -13.4357002 | -9.7743488  |
| C  | -15.5134236 | -12.2949533 | -10.2181116 |
| C  | -16.0241020 | -11.6206842 | -9.0444679  |
| N  | -15.7427688 | -12.3540567 | -7.9124049  |
| C  | -16.6405911 | -10.3318485 | -9.0629950  |
| H  | -18.3722124 | -6.9996870  | -6.2873868  |
| H  | -17.8910088 | -7.7342824  | -8.8812730  |
| H  | -17.6597353 | -9.3068371  | -1.5251714  |
| H  | -16.6467979 | -11.7031548 | -0.6710425  |
| H  | -14.2806022 | -15.8463155 | -3.0387681  |
| H  | -13.5649897 | -16.4496883 | -5.6096604  |
| H  | -14.3670063 | -14.2003975 | -10.3635345 |
| H  | -15.6154191 | -11.9335775 | -11.2461115 |
| Zn | -5.9631137  | -16.1813880 | -11.8333606 |
| C  | -1.6973112  | -16.7490113 | -11.3341550 |
| C  | -2.1269605  | -17.2568363 | -10.1282823 |
| C  | -3.5703169  | -17.1604800 | -10.1284097 |
| C  | -2.8815779  | -16.3398682 | -12.0560670 |
| N  | -4.0114675  | -16.6131795 | -11.3145088 |
| C  | -2.8620363  | -15.6787945 | -13.3192453 |
| C  | -4.0083706  | -15.2104472 | -14.0268368 |
| C  | -3.9521045  | -14.4887669 | -15.2802935 |
| C  | -5.2446466  | -14.1276982 | -15.5838870 |
| C  | -6.0767400  | -14.6469481 | -14.5223030 |
| N  | -5.3109232  | -15.3143232 | -13.5922668 |
| C  | -7.4847441  | -14.4502826 | -14.4411416 |
| C  | -8.3368703  | -15.0274399 | -13.4534725 |

|    |             |             |             |
|----|-------------|-------------|-------------|
| C  | -9.7743488  | -14.8837617 | -13.4357002 |
| C  | -10.2181116 | -15.5134236 | -12.2949533 |
| C  | -9.0444679  | -16.0241020 | -11.6206842 |
| N  | -7.9124049  | -15.7427688 | -12.3540567 |
| C  | -9.0629950  | -16.6405911 | -10.3318485 |
| C  | -7.9189955  | -17.1134645 | -9.6249179  |
| C  | -7.9651027  | -17.6981701 | -8.3030723  |
| C  | -6.6606795  | -17.9385531 | -7.9333394  |
| C  | -5.8302480  | -17.5023446 | -9.0350283  |
| N  | -6.6145497  | -17.0164354 | -10.0597413 |
| C  | -4.4028547  | -17.5446267 | -9.0330658  |
| H  | -0.6710425  | -16.6467979 | -11.7031548 |
| H  | -1.5251714  | -17.6597353 | -9.3068371  |
| H  | -3.0387681  | -14.2806022 | -15.8463155 |
| H  | -5.6096604  | -13.5649897 | -16.4496883 |
| H  | -10.3635345 | -14.3670063 | -14.2003975 |
| H  | -11.2461115 | -15.6154191 | -11.9335775 |
| H  | -8.8812730  | -17.8910088 | -7.7342824  |
| H  | -6.2873868  | -18.3722124 | -6.9996870  |
| Zn | -11.8333606 | -5.9631137  | -16.1813880 |
| C  | -15.5838870 | -5.2446466  | -14.1276982 |
| C  | -15.2802935 | -3.9521045  | -14.4887669 |
| C  | -14.0268368 | -4.0083706  | -15.2104472 |
| C  | -14.5223030 | -6.0767400  | -14.6469481 |
| N  | -13.5922668 | -5.3109232  | -15.3143232 |
| C  | -14.4411416 | -7.4847441  | -14.4502826 |
| C  | -13.4534725 | -8.3368703  | -15.0274399 |
| C  | -13.4357002 | -9.7743488  | -14.8837617 |
| C  | -12.2949533 | -10.2181116 | -15.5134236 |
| C  | -11.6206842 | -9.0444679  | -16.0241020 |
| N  | -12.3540567 | -7.9124049  | -15.7427688 |
| C  | -10.3318485 | -9.0629950  | -16.6405911 |
| C  | -9.6249179  | -7.9189955  | -17.1134645 |
| C  | -8.3030723  | -7.9651027  | -17.6981701 |
| C  | -7.9333394  | -6.6606795  | -17.9385531 |
| C  | -9.0350283  | -5.8302480  | -17.5023446 |
| N  | -10.0597413 | -6.6145497  | -17.0164354 |
| C  | -9.0330658  | -4.4028547  | -17.5446267 |
| C  | -10.1284097 | -3.5703169  | -17.1604800 |
| C  | -10.1282823 | -2.1269605  | -17.2568363 |
| C  | -11.3341550 | -1.6973112  | -16.7490113 |
| C  | -12.0560670 | -2.8815779  | -16.3398682 |
| N  | -11.3145088 | -4.0114675  | -16.6131795 |
| C  | -13.3192453 | -2.8620363  | -15.6787945 |
| H  | -16.4496883 | -5.6096604  | -13.5649897 |
| H  | -15.8463155 | -3.0387681  | -14.2806022 |
| H  | -14.2003975 | -10.3635345 | -14.3670063 |
| H  | -11.9335775 | -11.2461115 | -15.6154191 |
| H  | -7.7342824  | -8.8812730  | -17.8910088 |

|   |             |            |             |
|---|-------------|------------|-------------|
| H | -6.9996870  | -6.2873868 | -18.3722124 |
| H | -9.3068371  | -1.5251714 | -17.6597353 |
| H | -11.7031548 | -0.6710425 | -16.6467979 |
| C | 8.0629394   | 15.3201560 | 13.5088956  |
| C | 8.5635330   | 15.9175255 | 12.5390576  |
| C | 9.1280631   | 16.3827391 | 11.4033125  |
| C | 9.6632965   | 16.6269771 | 10.3070886  |
| C | 10.3070886  | 9.6632965  | 16.6269771  |
| C | 11.4033125  | 9.1280631  | 16.3827391  |
| C | 12.5390576  | 8.5635330  | 15.9175255  |
| C | 13.5088956  | 8.0629394  | 15.3201560  |
| C | 3.7659148   | 7.8313522  | 17.9311949  |
| C | 3.2146862   | 6.7434904  | 18.1791409  |
| C | 2.6231473   | 5.5439090  | 18.3846427  |
| C | 2.0856168   | 4.4297313  | 18.5190103  |
| C | 1.6109429   | 13.8863863 | 15.3521203  |
| C | 0.5658519   | 14.4115938 | 14.9327210  |
| C | -0.5658519  | 14.9327210 | 14.4115938  |
| C | -1.6109429  | 15.3521203 | 13.8863863  |
| C | 16.6269771  | 10.3070886 | 9.6632965   |
| C | 16.3827391  | 11.4033125 | 9.1280631   |
| C | 15.9175255  | 12.5390576 | 8.5635330   |
| C | 15.3201560  | 13.5088956 | 8.0629394   |
| C | 17.9311949  | 3.7659148  | 7.8313522   |
| C | 18.1791409  | 3.2146862  | 6.7434904   |
| C | 18.3846427  | 2.6231473  | 5.5439090   |
| C | 18.5190103  | 2.0856168  | 4.4297313   |
| C | 15.3521203  | 1.6109429  | 13.8863863  |
| C | 14.9327210  | 0.5658519  | 14.4115938  |
| C | 14.4115938  | -0.5658519 | 14.9327210  |
| C | 13.8863863  | -1.6109429 | 15.3521203  |
| C | 7.8313522   | 17.9311949 | 3.7659148   |
| C | 6.7434904   | 18.1791409 | 3.2146862   |
| C | 5.5439090   | 18.3846427 | 2.6231473   |
| C | 4.4297313   | 18.5190103 | 2.0856168   |
| C | 13.8863863  | 15.3521203 | 1.6109429   |
| C | 14.4115938  | 14.9327210 | 0.5658519   |
| C | 14.9327210  | 14.4115938 | -0.5658519  |
| C | 15.3521203  | 13.8863863 | -1.6109429  |
| C | -3.7659148  | 17.9311949 | 7.8313522   |
| C | -3.2146862  | 18.1791409 | 6.7434904   |
| C | -2.6231473  | 18.3846427 | 5.5439090   |
| C | -2.0856168  | 18.5190103 | 4.4297313   |
| C | -8.0629394  | 13.5088956 | 15.3201560  |
| C | -8.5635330  | 12.5390576 | 15.9175255  |
| C | -9.1280631  | 11.4033125 | 16.3827391  |
| C | -9.6632965  | 10.3070886 | 16.6269771  |
| C | -10.3070886 | 16.6269771 | 9.6632965   |
| C | -11.4033125 | 16.3827391 | 9.1280631   |

|   |             |             |             |
|---|-------------|-------------|-------------|
| C | -12.5390576 | 15.9175255  | 8.5635330   |
| C | -13.5088956 | 15.3201560  | 8.0629394   |
| C | 4.4297313   | -2.0856168  | 18.5190103  |
| C | 5.5439090   | -2.6231473  | 18.3846427  |
| C | 6.7434904   | -3.2146862  | 18.1791409  |
| C | 7.8313522   | -3.7659148  | 17.9311949  |
| C | -2.0856168  | -4.4297313  | 18.5190103  |
| C | -2.6231473  | -5.5439090  | 18.3846427  |
| C | -3.2146862  | -6.7434904  | 18.1791409  |
| C | -3.7659148  | -7.8313522  | 17.9311949  |
| C | -4.4297313  | 2.0856168   | 18.5190103  |
| C | -5.5439090  | 2.6231473   | 18.3846427  |
| C | -6.7434904  | 3.2146862   | 18.1791409  |
| C | -7.8313522  | 3.7659148   | 17.9311949  |
| C | 15.3201560  | -8.0629394  | 13.5088956  |
| C | 15.9175255  | -8.5635330  | 12.5390576  |
| C | 16.3827391  | -9.1280631  | 11.4033125  |
| C | 16.6269771  | -9.6632965  | 10.3070886  |
| C | 9.6632965   | -10.3070886 | 16.6269771  |
| C | 9.1280631   | -11.4033125 | 16.3827391  |
| C | 8.5635330   | -12.5390576 | 15.9175255  |
| C | 8.0629394   | -13.5088956 | 15.3201560  |
| C | 18.5190103  | 4.4297313   | -2.0856168  |
| C | 18.3846427  | 5.5439090   | -2.6231473  |
| C | 18.1791409  | 6.7434904   | -3.2146862  |
| C | 17.9311949  | 7.8313522   | -3.7659148  |
| C | 18.5190103  | -2.0856168  | -4.4297313  |
| C | 18.3846427  | -2.6231473  | -5.5439090  |
| C | 18.1791409  | -3.2146862  | -6.7434904  |
| C | 17.9311949  | -3.7659148  | -7.8313522  |
| C | 18.5190103  | -4.4297313  | 2.0856168   |
| C | 18.3846427  | -5.5439090  | 2.6231473   |
| C | 18.1791409  | -6.7434904  | 3.2146862   |
| C | 17.9311949  | -7.8313522  | 3.7659148   |
| C | 13.5088956  | 15.3201560  | -8.0629394  |
| C | 12.5390576  | 15.9175255  | -8.5635330  |
| C | 11.4033125  | 16.3827391  | -9.1280631  |
| C | 10.3070886  | 16.6269771  | -9.6632965  |
| C | 16.6269771  | 9.6632965   | -10.3070886 |
| C | 16.3827391  | 9.1280631   | -11.4033125 |
| C | 15.9175255  | 8.5635330   | -12.5390576 |
| C | 15.3201560  | 8.0629394   | -13.5088956 |
| C | -4.4297313  | 18.5190103  | -2.0856168  |
| C | -5.5439090  | 18.3846427  | -2.6231473  |
| C | -6.7434904  | 18.1791409  | -3.2146862  |
| C | -7.8313522  | 17.9311949  | -3.7659148  |
| C | 2.0856168   | 18.5190103  | -4.4297313  |
| C | 2.6231473   | 18.3846427  | -5.5439090  |
| C | 3.2146862   | 18.1791409  | -6.7434904  |

|   |             |             |             |
|---|-------------|-------------|-------------|
| C | 3.7659148   | 17.9311949  | -7.8313522  |
| C | -15.3521203 | 13.8863863  | 1.6109429   |
| C | -14.9327210 | 14.4115938  | 0.5658519   |
| C | -14.4115938 | 14.9327210  | -0.5658519  |
| C | -13.8863863 | 15.3521203  | -1.6109429  |
| C | -16.6269771 | 9.6632965   | 10.3070886  |
| C | -16.3827391 | 9.1280631   | 11.4033125  |
| C | -15.9175255 | 8.5635330   | 12.5390576  |
| C | -15.3201560 | 8.0629394   | 13.5088956  |
| C | -17.9311949 | 7.8313522   | 3.7659148   |
| C | -18.1791409 | 6.7434904   | 3.2146862   |
| C | -18.3846427 | 5.5439090   | 2.6231473   |
| C | -18.5190103 | 4.4297313   | 2.0856168   |
| C | -13.8863863 | 1.6109429   | 15.3521203  |
| C | -14.4115938 | 0.5658519   | 14.9327210  |
| C | -14.9327210 | -0.5658519  | 14.4115938  |
| C | -15.3521203 | -1.6109429  | 13.8863863  |
| C | -1.6109429  | -13.8863863 | 15.3521203  |
| C | -0.5658519  | -14.4115938 | 14.9327210  |
| C | 0.5658519   | -14.9327210 | 14.4115938  |
| C | 1.6109429   | -15.3521203 | 13.8863863  |
| C | -8.0629394  | -15.3201560 | 13.5088956  |
| C | -8.5635330  | -15.9175255 | 12.5390576  |
| C | -9.1280631  | -16.3827391 | 11.4033125  |
| C | -9.6632965  | -16.6269771 | 10.3070886  |
| C | -10.3070886 | -9.6632965  | 16.6269771  |
| C | -11.4033125 | -9.1280631  | 16.3827391  |
| C | -12.5390576 | -8.5635330  | 15.9175255  |
| C | -13.5088956 | -8.0629394  | 15.3201560  |
| C | 10.3070886  | -16.6269771 | 9.6632965   |
| C | 11.4033125  | -16.3827391 | 9.1280631   |
| C | 12.5390576  | -15.9175255 | 8.5635330   |
| C | 13.5088956  | -15.3201560 | 8.0629394   |
| C | 3.7659148   | -17.9311949 | 7.8313522   |
| C | 3.2146862   | -18.1791409 | 6.7434904   |
| C | 2.6231473   | -18.3846427 | 5.5439090   |
| C | 2.0856168   | -18.5190103 | 4.4297313   |
| C | 15.3521203  | -13.8863863 | 1.6109429   |
| C | 14.9327210  | -14.4115938 | 0.5658519   |
| C | 14.4115938  | -14.9327210 | -0.5658519  |
| C | 13.8863863  | -15.3521203 | -1.6109429  |
| C | 15.3521203  | -1.6109429  | -13.8863863 |
| C | 14.9327210  | -0.5658519  | -14.4115938 |
| C | 14.4115938  | 0.5658519   | -14.9327210 |
| C | 13.8863863  | 1.6109429   | -15.3521203 |
| C | 13.5088956  | -8.0629394  | -15.3201560 |
| C | 12.5390576  | -8.5635330  | -15.9175255 |
| C | 11.4033125  | -9.1280631  | -16.3827391 |
| C | 10.3070886  | -9.6632965  | -16.6269771 |

|   |             |             |             |
|---|-------------|-------------|-------------|
| C | 16.6269771  | -10.3070886 | -9.6632965  |
| C | 16.3827391  | -11.4033125 | -9.1280631  |
| C | 15.9175255  | -12.5390576 | -8.5635330  |
| C | 15.3201560  | -13.5088956 | -8.0629394  |
| C | 7.8313522   | 3.7659148   | -17.9311949 |
| C | 6.7434904   | 3.2146862   | -18.1791409 |
| C | 5.5439090   | 2.6231473   | -18.3846427 |
| C | 4.4297313   | 2.0856168   | -18.5190103 |
| C | 9.6632965   | 10.3070886  | -16.6269771 |
| C | 9.1280631   | 11.4033125  | -16.3827391 |
| C | 8.5635330   | 12.5390576  | -15.9175255 |
| C | 8.0629394   | 13.5088956  | -15.3201560 |
| C | 1.6109429   | 15.3521203  | -13.8863863 |
| C | 0.5658519   | 14.9327210  | -14.4115938 |
| C | -0.5658519  | 14.4115938  | -14.9327210 |
| C | -1.6109429  | 13.8863863  | -15.3521203 |
| C | -15.3201560 | 13.5088956  | -8.0629394  |
| C | -15.9175255 | 12.5390576  | -8.5635330  |
| C | -16.3827391 | 11.4033125  | -9.1280631  |
| C | -16.6269771 | 10.3070886  | -9.6632965  |
| C | -9.6632965  | 16.6269771  | -10.3070886 |
| C | -9.1280631  | 16.3827391  | -11.4033125 |
| C | -8.5635330  | 15.9175255  | -12.5390576 |
| C | -8.0629394  | 15.3201560  | -13.5088956 |
| C | -18.5190103 | 2.0856168   | -4.4297313  |
| C | -18.3846427 | 2.6231473   | -5.5439090  |
| C | -18.1791409 | 3.2146862   | -6.7434904  |
| C | -17.9311949 | 3.7659148   | -7.8313522  |
| C | -18.5190103 | -2.0856168  | 4.4297313   |
| C | -18.3846427 | -2.6231473  | 5.5439090   |
| C | -18.1791409 | -3.2146862  | 6.7434904   |
| C | -17.9311949 | -3.7659148  | 7.8313522   |
| C | -18.5190103 | -4.4297313  | -2.0856168  |
| C | -18.3846427 | -5.5439090  | -2.6231473  |
| C | -18.1791409 | -6.7434904  | -3.2146862  |
| C | -17.9311949 | -7.8313522  | -3.7659148  |
| C | -16.6269771 | -10.3070886 | 9.6632965   |
| C | -16.3827391 | -11.4033125 | 9.1280631   |
| C | -15.9175255 | -12.5390576 | 8.5635330   |
| C | -15.3201560 | -13.5088956 | 8.0629394   |
| C | -7.8313522  | -17.9311949 | 3.7659148   |
| C | -6.7434904  | -18.1791409 | 3.2146862   |
| C | -5.5439090  | -18.3846427 | 2.6231473   |
| C | -4.4297313  | -18.5190103 | 2.0856168   |
| C | -13.8863863 | -15.3521203 | 1.6109429   |
| C | -14.4115938 | -14.9327210 | 0.5658519   |
| C | -14.9327210 | -14.4115938 | -0.5658519  |
| C | -15.3521203 | -13.8863863 | -1.6109429  |
| C | 4.4297313   | -18.5190103 | -2.0856168  |

|   |             |             |             |
|---|-------------|-------------|-------------|
| C | 5.5439090   | -18.3846427 | -2.6231473  |
| C | 6.7434904   | -18.1791409 | -3.2146862  |
| C | 7.8313522   | -17.9311949 | -3.7659148  |
| C | -2.0856168  | -18.5190103 | -4.4297313  |
| C | -2.6231473  | -18.3846427 | -5.5439090  |
| C | -3.2146862  | -18.1791409 | -6.7434904  |
| C | -3.7659148  | -17.9311949 | -7.8313522  |
| C | 9.6632965   | -16.6269771 | -10.3070886 |
| C | 9.1280631   | -16.3827391 | -11.4033125 |
| C | 8.5635330   | -15.9175255 | -12.5390576 |
| C | 8.0629394   | -15.3201560 | -13.5088956 |
| C | 3.7659148   | -7.8313522  | -17.9311949 |
| C | 3.2146862   | -6.7434904  | -18.1791409 |
| C | 2.6231473   | -5.5439090  | -18.3846427 |
| C | 2.0856168   | -4.4297313  | -18.5190103 |
| C | 1.6109429   | -13.8863863 | -15.3521203 |
| C | 0.5658519   | -14.4115938 | -14.9327210 |
| C | -0.5658519  | -14.9327210 | -14.4115938 |
| C | -1.6109429  | -15.3521203 | -13.8863863 |
| C | -4.4297313  | -2.0856168  | -18.5190103 |
| C | -5.5439090  | -2.6231473  | -18.3846427 |
| C | -6.7434904  | -3.2146862  | -18.1791409 |
| C | -7.8313522  | -3.7659148  | -17.9311949 |
| C | -2.0856168  | 4.4297313   | -18.5190103 |
| C | -2.6231473  | 5.5439090   | -18.3846427 |
| C | -3.2146862  | 6.7434904   | -18.1791409 |
| C | -3.7659148  | 7.8313522   | -17.9311949 |
| C | -10.3070886 | 9.6632965   | -16.6269771 |
| C | -11.4033125 | 9.1280631   | -16.3827391 |
| C | -12.5390576 | 8.5635330   | -15.9175255 |
| C | -13.5088956 | 8.0629394   | -15.3201560 |
| C | -15.3521203 | 1.6109429   | -13.8863863 |
| C | -14.9327210 | 0.5658519   | -14.4115938 |
| C | -14.4115938 | -0.5658519  | -14.9327210 |
| C | -13.8863863 | -1.6109429  | -15.3521203 |
| C | -13.5088956 | -15.3201560 | -8.0629394  |
| C | -12.5390576 | -15.9175255 | -8.5635330  |
| C | -11.4033125 | -16.3827391 | -9.1280631  |
| C | -10.3070886 | -16.6269771 | -9.6632965  |
| C | -16.6269771 | -9.6632965  | -10.3070886 |
| C | -16.3827391 | -9.1280631  | -11.4033125 |
| C | -15.9175255 | -8.5635330  | -12.5390576 |
| C | -15.3201560 | -8.0629394  | -13.5088956 |
| C | -8.0629394  | -13.5088956 | -15.3201560 |
| C | -8.5635330  | -12.5390576 | -15.9175255 |
| C | -9.1280631  | -11.4033125 | -16.3827391 |
| C | -9.6632965  | -10.3070886 | -16.6269771 |
